# Supplementary material for: LiOtBu-promoted stereoselective deconjugation of α,β-unsaturated diesters probed using density functional theory
Source: Royal Society of Chemistry journal article supplement (doi:10.1039/d0qo01091j), 2020-01-01

## Supplementary Information

### LiOtBu-Promoted Stereoselective Deconjugation of $\alpha,\beta$ -Unsaturated Diesters Probed by Density Functional Theory

Won Jun Jang,<sup>a</sup> Seon Bin Song,<sup>a</sup> Soyeon Lee,<sup>a</sup> Seok Yeol Yoo,<sup>a</sup> You Kyoung Chung,<sup>a</sup> Joonsuk Huh<sup>a,b\*</sup> and Jaesook Yun<sup>a\*</sup>

<sup>a</sup> Department of Chemistry, Sungkyunkwan University, Suwon 16419, Korea

<sup>b</sup> School of Advanced Institute of Nanotechnology, Sungkyunkwan University, Suwon 16419, Korea

joonsukhuh@skku.edu

jaesook@skku.edu

### Table of Contents

|                                                     |              |
|-----------------------------------------------------|--------------|
| I . General Methods                                 | Page S1      |
| II . Experimental Details                           | Page S1–S82  |
| III . References                                    | Page S83     |
| IV . <sup>1</sup> H and <sup>13</sup> C NMR spectra | Page S84–S96 |

**General methods:** All commercial reagents were purchased from Aldrich and used as received. compounds **1a–1d**, and **1i–1k** was prepared by following literature procedures.<sup>1</sup> THF was purified using PureSolv solvent purification system, from Innovative Technology, Inc. Reactions with oxygen- and moisture-sensitive materials were carried out with the standard Schlenk technique. Flash chromatography was performed on silica gel from Merck (70–230 mesh). All <sup>1</sup>H NMR spectra were obtained on Bruker at 500 systems and reported in parts per million (ppm) downfield from tetramethylsilane. <sup>13</sup>C NMR spectra were reported in ppm referenced to deuteriochloroform (77.16 ppm). High resolution mass spectra (HRMS) were obtained at Korea Basic Science Institute (Cheongju, Korea) and reported in the form of *m/z* (intensity relative to peak = 100).

### Preparation of tetrasubstituted $\alpha,\beta$ -unsaturated diesters (**1e–1h**)<sup>2</sup>

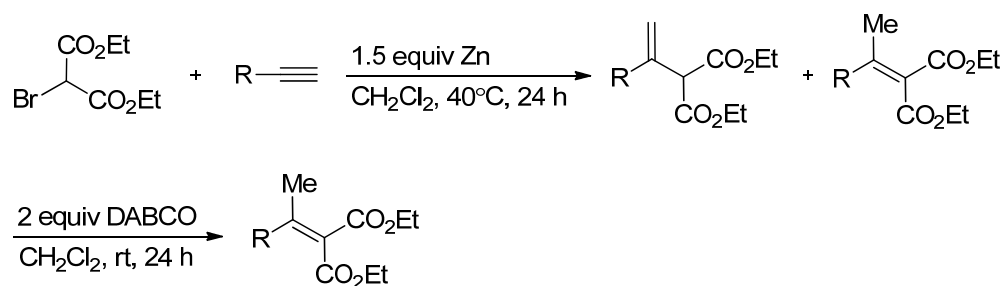

To an oven-dried round-bottomed flask, zinc powder (7.5 mmol, 1.5 equiv) and dichloromethane (5 mL) were charged under an atmosphere of nitrogen. Diethyl bromomalonate (5 mmol, 1 equiv), and terminal alkyne (7.5 mmol, 1.5 equiv) were added to the reaction solution. The reaction mixture was stirred at 40 °C for 24 h. The reaction mixture was filtered through a small plug of Celite, and washed with several portions of dichloromethane, and the filtrate was dried in vacuo. The crude mixture was used for the next step without further purification. The crude mixture and DABCO (10 mmol) were dissolved in dichloromethane (6 mL). The reaction mixture was stirred at room temperature for 24 h. Upon completion of the reaction, the reaction mixture was filtered through a pad of Celite and concentrated. The product was purified by silica gel chromatography.

## General procedure for deconjugation reaction of $\alpha,\beta$ -unsaturated diesters

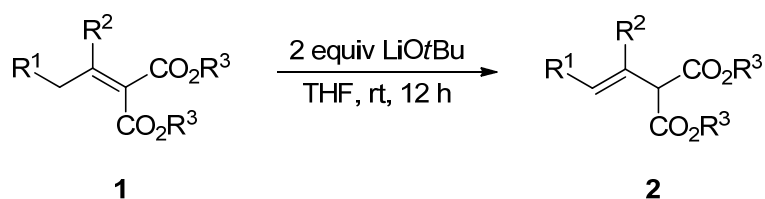

LiOtBu (2 equiv, 1 mmol) was placed in an oven-dried round-bottomed flask.  $\alpha,\beta$ -Unsaturated diester (**1**) dissolved in THF (1 mL) was added to the reaction mixture. The reaction mixture was stirred at room temperature for 12 h. Upon completion of the reaction, the reaction mixture was quenched with sat.  $\text{NH}_4\text{Cl}$  (5 mL). The aqueous layer was extracted with ethyl acetate (10 mL), and the combined organic layers were dried over  $\text{Na}_2\text{SO}_4$ , and concentrated in vacuo. The product was purified by silica gel chromatography.

## Characterization of $\beta,\gamma$ -unsaturated diesters **2** (Scheme 2)

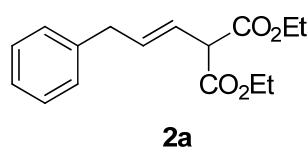

**(E)-diethyl 2-(prop-1-en-1-yl)malonate (2a)** (Scheme 2): By following the general procedure, **2a** was obtained in 94% yield (colorless oil). The characterization data for **2a** was concordant with that previously reported in the literature.<sup>3</sup>  $^1\text{H}$  NMR (500 MHz,  $\text{C}_6\text{D}_6$ )  $\delta$  7.13–7.10 (m, 2H), 7.04–7.02 (m, 3H), 6.02 (dd,  $J = 15.5, 9.0$  Hz, 1H), 5.64 (dq,  $J = 15.5, 7.0$  Hz, 1H), 4.05 (d,  $J = 9.0$  Hz, 1H), 3.93 (q,  $J = 7.0$  Hz, 4H), 3.13 (q,  $J = 7.0$  Hz, 2H), 0.89 (t,  $J = 7.0$  Hz, 6H);  $^{13}\text{C}$  NMR (125 MHz,  $\text{C}_6\text{D}_6$ )  $\delta$  167.8, 139.5, 134.8, 128.5, 128.3, 126.1, 123.5, 61.0, 55.7, 38.7, 13.6.

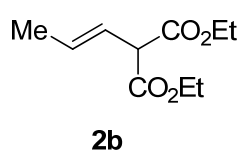

**(E)-diethyl 2-(prop-1-en-1-yl)malonate (2b)** (Scheme 2): By following the general procedure, **2b** was obtained in 89% yield (colorless oil). The characterization data for **2b** was concordant with that previously reported in the literature.<sup>4</sup>  $^1\text{H}$  NMR (500 MHz,  $\text{C}_6\text{D}_6$ )  $\delta$  6.04 (ddq,  $J = 15.0, 9.0, 2.0$  Hz, 1H), 5.46 (dq,  $J = 15.0, 6.5$  Hz, 1H), 4.06 (d,  $J = 9.0$  Hz, 1H), 3.95 (q,  $J = 7.0$  Hz, 2H), 3.94 (q,  $J = 7.0$  Hz, 2H), 1.44 (dd,  $J = 6.5, 2.0$  Hz, 3H), 0.90 (t,  $J = 7.0$  Hz, 6H);  $^{13}\text{C}$  NMR (125 MHz,  $\text{C}_6\text{D}_6$ )  $\delta$  167.9, 130.8, 123.4, 61.0, 55.9, 17.5, 13.6.

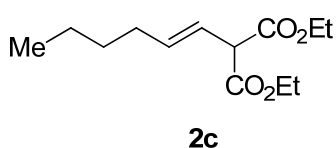

**(E)-diethyl 2-(hex-1-en-1-yl)malonate (2c)** (Scheme 2): By following the general procedure, **2c** was obtained in 86% yield (colorless oil). <sup>1</sup>H NMR (500 MHz, C<sub>6</sub>D<sub>6</sub>) δ 6.01 (dd, *J* = 15.5, 9.0 Hz, 1H), 5.55 (dt, *J* = 15.0, 7.0 Hz, 1H), 4.11 (d, *J* = 9.0 Hz, 1H), 3.96 (q, *J* = 7.0 Hz, 4H), 1.88 (q, *J* = 7.0 Hz, 2H), 1.21–1.15 (m, 2H), 0.91 (t, *J* = 7.0 Hz, 6H), 0.78 (t, *J* = 7.0 Hz, 3H); <sup>13</sup>C NMR (125 MHz, C<sub>6</sub>D<sub>6</sub>) δ 168.0, 136.3, 122.2, 61.0, 55.9, 32.0, 30.9, 28.5, 22.0, 13.6; IR (neat) 2965, 1735, 1465, 1369, 1264, 1176, 1033 cm<sup>-1</sup>; HRMS (ESI) calcd. for [C<sub>13</sub>H<sub>22</sub>O<sub>4</sub>+Na<sup>+</sup>]: 265.1416, found: 265.1417.

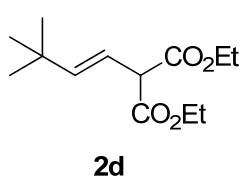

**(E)-diethyl 2-(3,3-dimethylbut-1-en-1-yl)malonate (2d)** (Scheme 2): By following the general procedure, **2d** was obtained in 92% yield (colorless oil). <sup>1</sup>H NMR (500 MHz, CDCl<sub>3</sub>) δ 5.70 (d, *J* = 15.5 Hz, 1H), 5.59 (dd, *J* = 15.5, 8.5 Hz, 1H), 4.20 (q, *J* = 7.0 Hz, 4H), 3.94 (d, *J* = 8.5 Hz, 1H), 1.26 (t, *J* = 7.0 Hz, 6H), 1.03 (s, 9H); <sup>13</sup>C NMR (125 MHz, CDCl<sub>3</sub>) δ 168.6, 147.5, 116.7, 61.5, 55.7, 33.4, 29.3, 14.0; IR (neat) 2962, 1736, 1465, 1367, 1258, 1147, 1035 cm<sup>-1</sup>; HRMS (ESI) calcd. for [C<sub>13</sub>H<sub>22</sub>O<sub>4</sub>+Na<sup>+</sup>]: 265.1416, found: 265.1416.

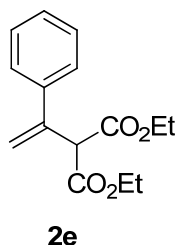

**Diethyl 2-(1-phenylvinyl)malonate (2e)** (Scheme 2): By following the general procedure, **2e** was obtained in 98% yield (colorless oil). The characterization data for **2e** was concordant with that previously reported in the literature.<sup>2</sup> <sup>1</sup>H NMR (500 MHz, CDCl<sub>3</sub>) δ 7.42–7.39 (m, 2H), 7.35–7.27 (m, 3H), 5.64 (s, 1H), 5.42 (s, 1H), 4.62 (s, 1H), 4.22 (q, *J* = 7.0 Hz, 2H), 4.21 (q, *J* = 7.0 Hz, 2H), 1.24 (t, *J* = 7.0 Hz, 6H); <sup>13</sup>C NMR (125 MHz, CDCl<sub>3</sub>) δ 167.9, 140.7, 140.2, 128.4, 128.0, 126.3, 117.7, 61.8, 57.2, 14.0.

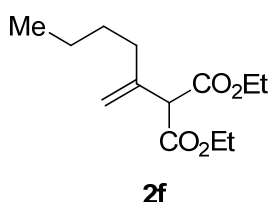

**Diethyl 2-(hex-1-en-2-yl)malonate (2f)** (Scheme 2): By following the general procedure, **2f** was obtained in 98% yield (colorless oil). <sup>1</sup>H NMR (500 MHz, CDCl<sub>3</sub>) δ 5.10 (s, 1H), 5.07 (s, 1H), 4.21 (q, *J* = 7.0 Hz, 2H), 4.20 (q, *J* = 7.0 Hz, 2H), 4.06 (s, 1H), 2.15 (t, *J* = 7.0 Hz, 2H), 1.48–1.42 (m, 2H), 1.37–1.31 (m, 2H), 1.27 (t, *J* = 7.0 Hz, 6H), 0.91 (t, *J* = 7.0 Hz, 3H); <sup>13</sup>C NMR (125 MHz, CDCl<sub>3</sub>) δ 168.1, 141.7, 115.0, 61.5, 58.4, 34.8, 29.6, 22.3, 14.0, 13.9; IR (neat) 2960, 1735, 1465, 1368, 1306, 1146, 1035 cm<sup>-1</sup>; HRMS (ESI) calcd. for [C<sub>13</sub>H<sub>22</sub>O<sub>4</sub>+Na<sup>+</sup>]: 265.1416, found: 265.1417.

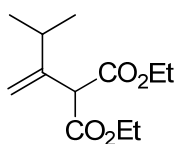

**2g**

**Diethyl 2-(3-methylbut-1-en-2-yl)malonate (2g)** (Scheme 2): By following the general procedure, **2g** was obtained in 98% yield (colorless oil). <sup>1</sup>H NMR (500 MHz, CDCl<sub>3</sub>) δ 5.16 (s, 1H), 5.11 (s, 1H), 4.20 (q, *J* = 7.0 Hz, 4H), 4.06 (s, 1H), 2.38–2.33 (m, 1H), 1.27 (t, *J* = 7.0 Hz, 6H), 1.06 (d, *J* = 7.0 Hz, 6H); <sup>13</sup>C NMR (125 MHz, CDCl<sub>3</sub>) δ 168.3, 147.5, 113.2, 61.5, 56.4, 34.5, 21.7, 14.0; IR (neat) 2966, 1735, 1466, 1368, 1235, 1142, 1034 cm<sup>-1</sup>; HRMS (ESI) calcd. for [C<sub>12</sub>H<sub>20</sub>O<sub>4</sub>+Na<sup>+</sup>]: 251.1259, found: 251.1260.

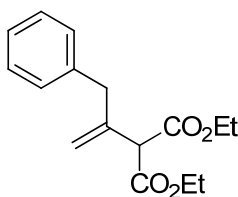

**2h**

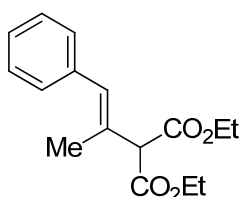

**2h'**

**diethyl 2-(3-phenylprop-1-en-2-yl)malonate (2h) + (E)-diethyl 2-(1-phenylprop-1-en-2-yl)malonate (2h')** (Scheme 2): By following the general procedure, **2h + 2h'** (1:1 mixture) were obtained in 87% yield (colorless oil). <sup>1</sup>H NMR (500 MHz, CDCl<sub>3</sub>) δ 7.53–7.28 (m, 3H, **2h**, **2h'**), 7.23–7.19 (m, 2H, **2h**, **2h'**), 6.48 (s, 1H, **2h'**), 5.19 (s, 1H, **2h**), 5.01 (s, 1H, **2h**), 4.25 (q, *J* = 7.0 Hz, 4H, **2h'**), 4.21–4.14 (m, 5H, **2h**), 4.05 (s, 1H, **2h'**), 3.52 (s, 2H, **2h**), 2.01 (s, 3H, **2h'**), 1.30 (t, *J* = 7.0 Hz, 6H, **2h** or **2h'**), 1.30 (t, *J* = 7.0 Hz, 6H, **2h** or **2h'**); <sup>13</sup>C NMR (125 MHz, CDCl<sub>3</sub>) δ 168.2 (**2h** or **2h'**), 167.9 (**2h** or **2h'**), 140.9 (**2h**), 138.2 (**2h'**), 137.0 (**2h'**), 131.5 (**2h** or **2h'**), 130.8 (**2h** or **2h'**), 129.4 (**2h** or **2h'**), 129.0 (**2h** or **2h'**), 128.4 (**2h** or **2h'**), 128.1 (**2h** or **2h'**), 126.9 (**2h** or **2h'**), 126.5 (**2h** or **2h'**), 117.7 (**2h**), 61.6 (**2h** and **2h'**) 57.7 (**2h** and **2h'**), 41.7 (**2h**), 16.5 (**2h'**), 14.1 (**2h** or **2h'**), 14.0 (**2h** or **2h'**); IR (neat) 2984, 1733, 1447, 1368, 1306, 1145, 1037 cm<sup>-1</sup>; HRMS (ESI) calcd. for [C<sub>16</sub>H<sub>20</sub>O<sub>4</sub>+Na<sup>+</sup>]: 299.1259, found: 299.1260.

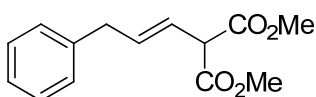

**2i**

**(E)-dimethyl 2-(3-phenylprop-1-en-1-yl)malonate (2i)** (Scheme 2): By following the general procedure, **2i** was obtained in 93% yield (colorless oil). <sup>1</sup>H NMR (500 MHz, C<sub>6</sub>D<sub>6</sub>) δ 7.13–7.10 (m, 2H), 7.05–7.01 (m, 3H), 5.96 (ddt, *J* = 15.0, 9.0, 1.5 Hz, 1H), 5.60 (dt, *J* = 15.0, 7.0 Hz, 1H), 4.01 (d, *J* = 9.0 Hz, 1H), 3.27 (s, 6H), 3.11 (q, *J* = 7.0 Hz, 2H); <sup>13</sup>C NMR (125 MHz, C<sub>6</sub>D<sub>6</sub>) δ 168.1, 139.4, 135.0, 128.5, 128.4, 126.1, 123.1, 55.2, 51.7, 38.7; IR (neat) 2966, 1735, 1466, 1368, 1235, 1142, 1034 cm<sup>-1</sup>; HRMS (ESI) calcd. for [C<sub>14</sub>H<sub>16</sub>O<sub>4</sub>+Na<sup>+</sup>]: 271.0946, found: 271.0947.

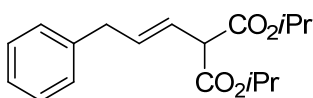

**2j**

**(E)-dimethyl 2-(3-phenylprop-1-en-1-yl)malonate (2j)** (Scheme 2): By following the general procedure, **2j** was obtained in 92% yield (colorless oil). <sup>1</sup>H NMR (500 MHz, C<sub>6</sub>D<sub>6</sub>) δ 7.13–7.10 (m, 2H), 7.04–7.01 (m, 3H), 6.05 (ddt, *J* = 15.5, 9.0, 1.5 Hz, 1H), 5.65 (dt, *J* = 15.5, 7.0 Hz, 1H), 5.05–4.97 (m, 2H), 4.04 (d, *J* = 9.0 Hz, 1H), 3.14 (d, *J* = 7.0 Hz, 1H), 1.02 (d, *J* = 6.0 Hz, 1H), 0.99 (d,

$J = 6.0$  Hz, 1H);  $^{13}\text{C}$  NMR (125 MHz,  $\text{C}_6\text{D}_6$ )  $\delta$  167.4, 139.6, 134.6, 128.5, 128.3, 126.1, 123.7, 68.5, 56.0, 38.7, 21.2; IR (neat) 2966, 1735, 1466, 1368, 1235, 1142, 1034  $\text{cm}^{-1}$ ; HRMS (ESI) calcd. for  $[\text{C}_{18}\text{H}_{24}\text{O}_4+\text{Na}^+]$ : 327.1572, found: 327.1561.

### General procedure for the deconjugative alkylation of $\alpha,\beta$ -unsaturated diesters (Scheme 4)

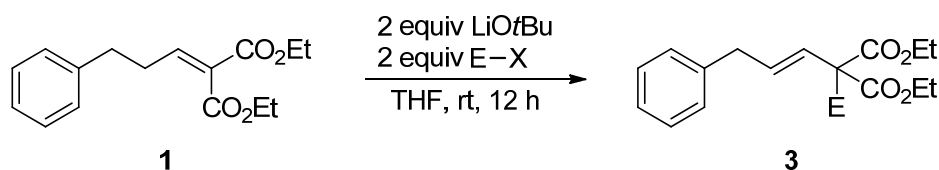

LiOtBu (2 equiv, 1 mmol) was placed in an oven-dried round-bottomed flask.  $\alpha,\beta$ -Unsaturated diester (**1**) and alkyl electrophile (E-X) dissolved in THF (1 mL) was added to the reaction mixture. The reaction mixture was stirred at room temperature for 12 h. Upon completion of the reaction, the reaction mixture was quenched with sat.  $\text{NH}_4\text{Cl}$  (5 mL). The aqueous layer was extracted with ethyl acetate (10 mL), and the combined organic layers were dried over  $\text{Na}_2\text{SO}_4$ , and concentrated in vacuo. The product was purified by silica gel chromatography.

### Characterization of **3** (Scheme 4)

**(E)-diethyl 2-allyl-2-(3-phenylprop-1-en-1-yl)malonate (3a)** (Scheme 4):  
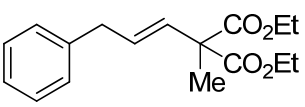  
**3a** By following the general procedure, **3a** was obtained in 88% yield (colorless oil).  $^1\text{H}$  NMR (500 MHz,  $\text{CDCl}_3$ )  $\delta$  7.32–7.27 (m, 2H), 7.21–7.16 (m, 3H), 6.04 (dt,  $J = 16.0, 1.5$  Hz, 1H), 5.74 (dt,  $J = 16.0, 7.0$  Hz, 1H), 4.20 (q,  $J = 7.0$  Hz, 4H), 3.43 (d,  $J = 7.0$  Hz, 2H), 1.55 (s, 3H), 1.25 (t,  $J = 7.0$  Hz, 6H);  $^{13}\text{C}$  NMR (125 MHz,  $\text{CDCl}_3$ )  $\delta$  171.3, 139.9, 130.5, 129.6, 128.5, 128.4, 126.2, 61.5, 55.5, 38.9, 20.3, 14.0; IR (neat) 2973, 1731, 1454, 1375, 1252, 1193, 1032  $\text{cm}^{-1}$ ; HRMS (ESI) calcd. for  $[\text{C}_{17}\text{H}_{22}\text{O}_4+\text{Na}^+]$ : 313.1416, found: 313.1415.

**(E)-diethyl 2-allyl-2-(3-phenylprop-1-en-1-yl)malonate (3b)** (Scheme 4):  
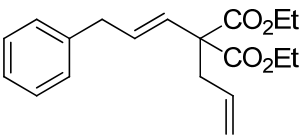  
**3b** By following the general procedure, **3b** was obtained in 91% yield (colorless oil).  $^1\text{H}$  NMR (500 MHz,  $\text{CDCl}_3$ )  $\delta$  7.29–7.26 (m, 2H), 7.21–7.15 (m, 3H), 6.04 (d,  $J = 16.0$  Hz, 1H), 5.78–5.65 (m, 2H), 5.10–5.05 (m, 2H),

4.19 (q,  $J = 7.0$  Hz, 4H), 3.43 (d,  $J = 7.0$  Hz, 2H), 2.80 (d,  $J = 7.5$  Hz, 2H), 1.23 (t,  $J = 7.0$  Hz, 6H);  $^{13}\text{C}$  NMR (125 MHz,  $\text{CDCl}_3$ )  $\delta$  170.3, 139.8, 132.6, 131.5, 128.5, 128.4, 128.0, 126.2, 118.8, 61.5, 59.2, 39.9, 39.1, 14.1 IR (neat) 3028, 2981, 1731, 1452, 1278, 1258, 1151, 1037  $\text{cm}^{-1}$ ; HRMS (ESI) calcd. for  $[\text{C}_{19}\text{H}_{24}\text{O}_4+\text{Na}^+]$ : 339.1572, found: 339.1573.

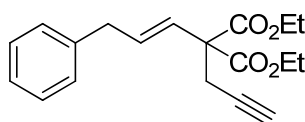

**3c**

**(E)-diethyl 2-(3-phenylprop-1-en-1-yl)-2-(prop-2-yn-1-yl)malonate (3c)**

(Scheme 4): By following the general procedure, **3c** was obtained in 85% yield (colorless oil).  $^1\text{H}$  NMR (500 MHz,  $\text{CDCl}_3$ )  $\delta$  7.29–7.26 (m, 2H), 7.21–7.18 (m, 3H), 6.13 (dt,  $J = 16.0, 1.5$  Hz, 1H), 5.79 (dt,  $J = 16.0, 7.0$  Hz, 1H), 4.23 (q,  $J = 7.0$  Hz, 2H), 4.22 (q,  $J = 7.0$  Hz, 2H), 3.47 (d,  $J = 7.0$  Hz, 2H), 2.95 (d,  $J = 2.5$  Hz, 2H), 1.99 (d,  $J = 2.5$  Hz, 1H), 1.25 (t,  $J = 7.0$  Hz, 6H);  $^{13}\text{C}$  NMR (125 MHz,  $\text{CDCl}_3$ )  $\delta$  169.3, 139.6, 131.9, 128.5, 128.4, 127.1, 126.2, 126.1, 79.2, 71.2, 61.9, 68.8, 39.0, 25.3, 14.0.; IR (neat) 3289, 2981, 1733, 1454, 1368, 1276, 1190, 1033  $\text{cm}^{-1}$ ; HRMS (ESI) calcd. for  $[\text{C}_{19}\text{H}_{22}\text{O}_4+\text{Na}^+]$ : 337.1416, found: 337.1414.

**Table S1. Optimization of reaction conditions**

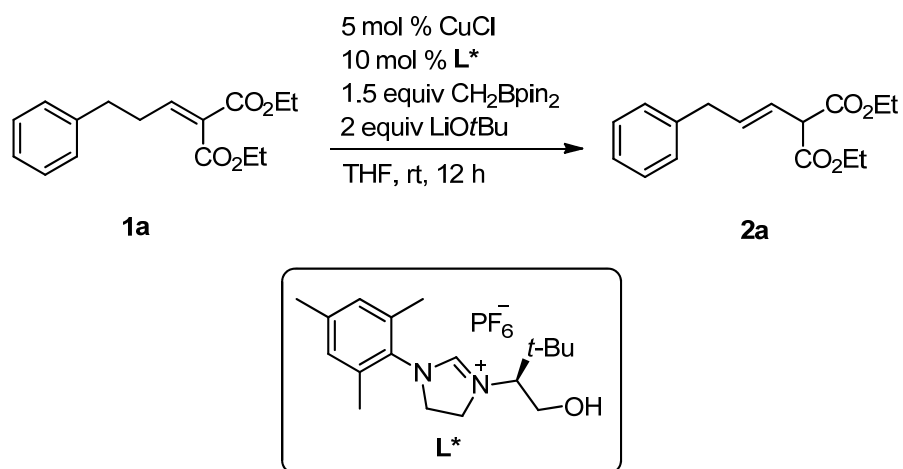

| Entry | Change from standard conditions                              | yield <sup>b</sup> |
|-------|--------------------------------------------------------------|--------------------|
| 1     | none                                                         | 22                 |
| 2     | without CH <sub>2</sub> Bpin <sub>2</sub>                    | 55                 |
| 3     | without CH <sub>2</sub> Bpin <sub>2</sub> & <b>L*</b>        | 71                 |
| 4     | without CH <sub>2</sub> Bpin <sub>2</sub> & <b>L*</b> & CuCl | 91                 |



## Computational Methods

We have performed density functional theory (DFT) calculations to find the most stable structures of reactants and products using a hybrid functional B3LYP<sup>5,6</sup> and def2-SVP<sup>7</sup> basis set implemented in TUROMOLE 7.3 program<sup>8,9</sup> utilizing the resolution of identity (RI) method.<sup>10</sup> For the most reasonable reaction path and transition states (TS), *ab initio* molecular dynamics (AIMD) calculations at 298K are initially carried out. Conductor-like Screening Model (COSMO)<sup>11</sup> is used to consider the implicit solvent-mediated effect for the geometry optimization, AIMD, and TS calculations with dielectric constants 7.58 for THF (tetrahydrofuran) and 9.1 for DCM (dichloromethane).

**Figure S1.** Deconjugation of **1e** with LiOtBu (**Figure S1(a)**) and conjugation of **2e** with DABCO (**Figure S1(b)**). 'INT' denotes the intermediate (**Figure S1(b)**).

(a)

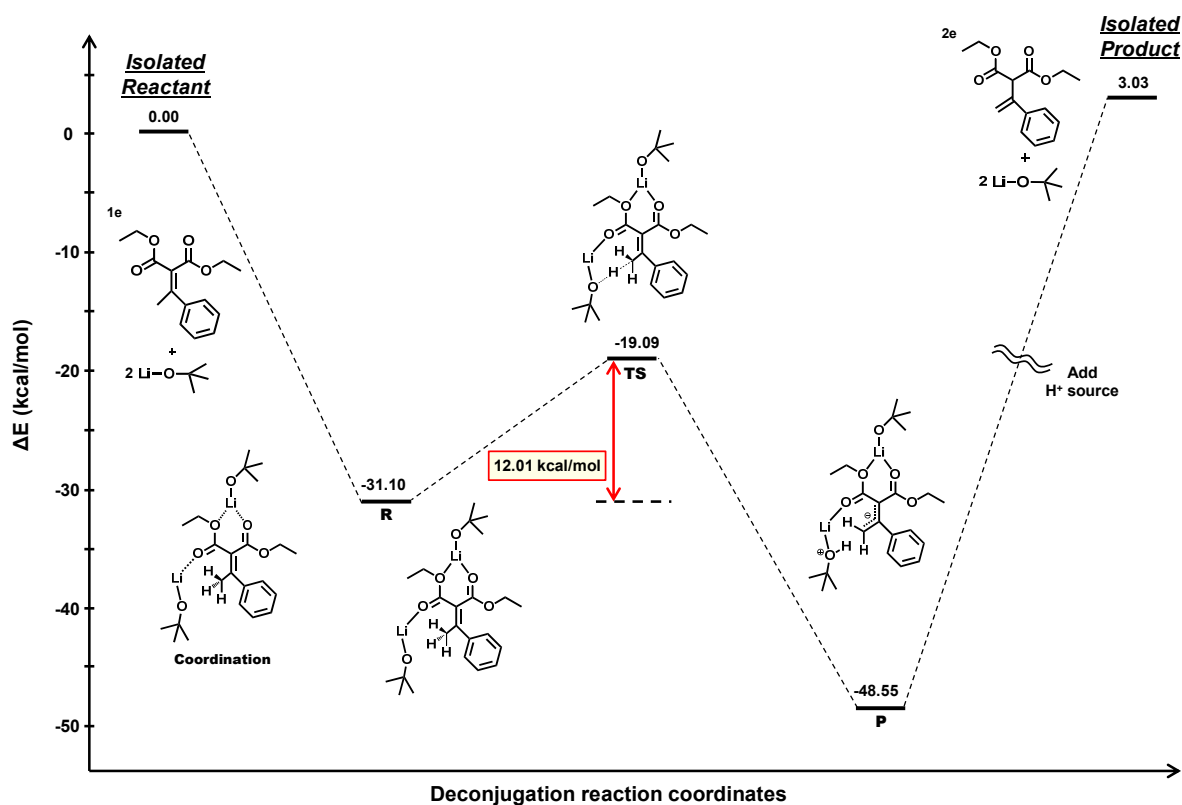

(b)

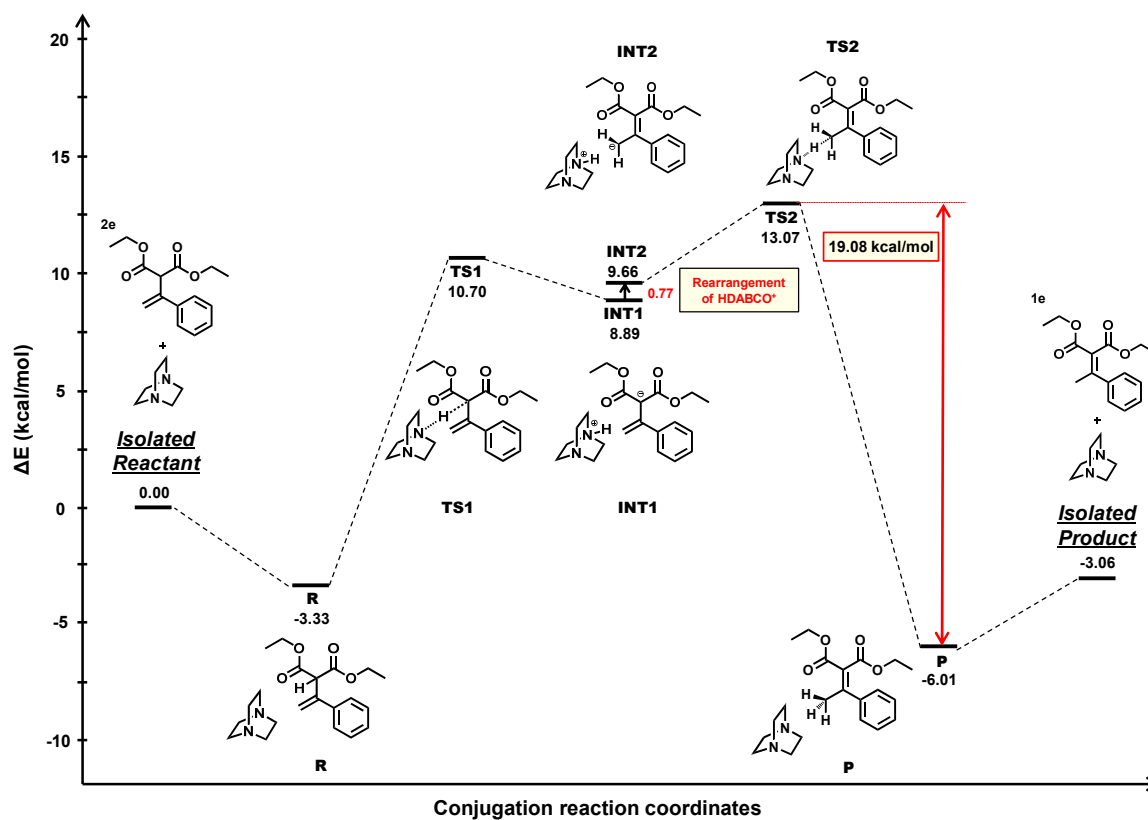

This calculation shows the activation energy for deconjugation reaction with LiOtBu (**12.01 kcal/mol**) is lower than that with DABCO (**19.08 kcal/mol**). The energy difference between the isolated reactant and isolated product in each reaction is caused by solvent difference used in **Figure S1(a)** (THF) and **Figure S1(b)** (DCM).

**Scheme S1.** Conjugation reaction of  $\beta,\gamma$ -unsaturated diesters with DABCO.

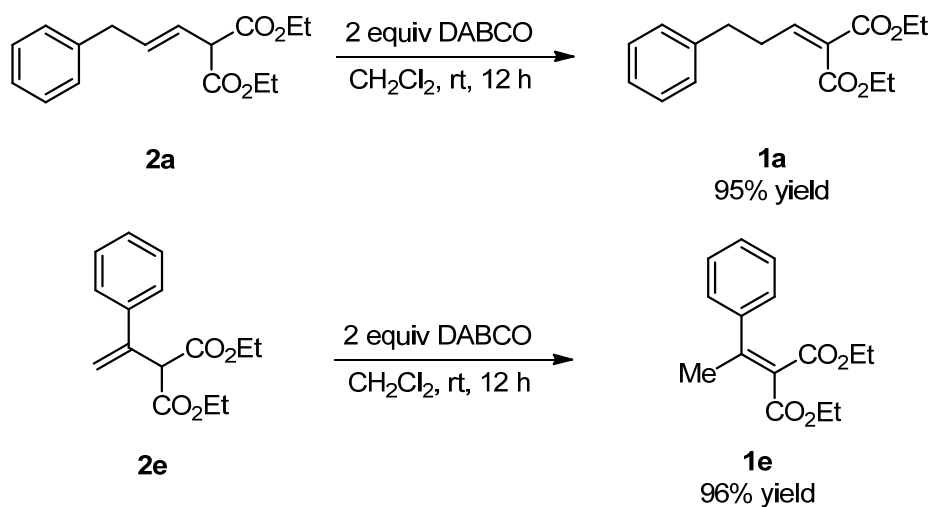

**Figure S2.** Different energy stability of metal-O coordination compound upon the base (LiOtBu, NaOtBu, and KOtBu).

(a)

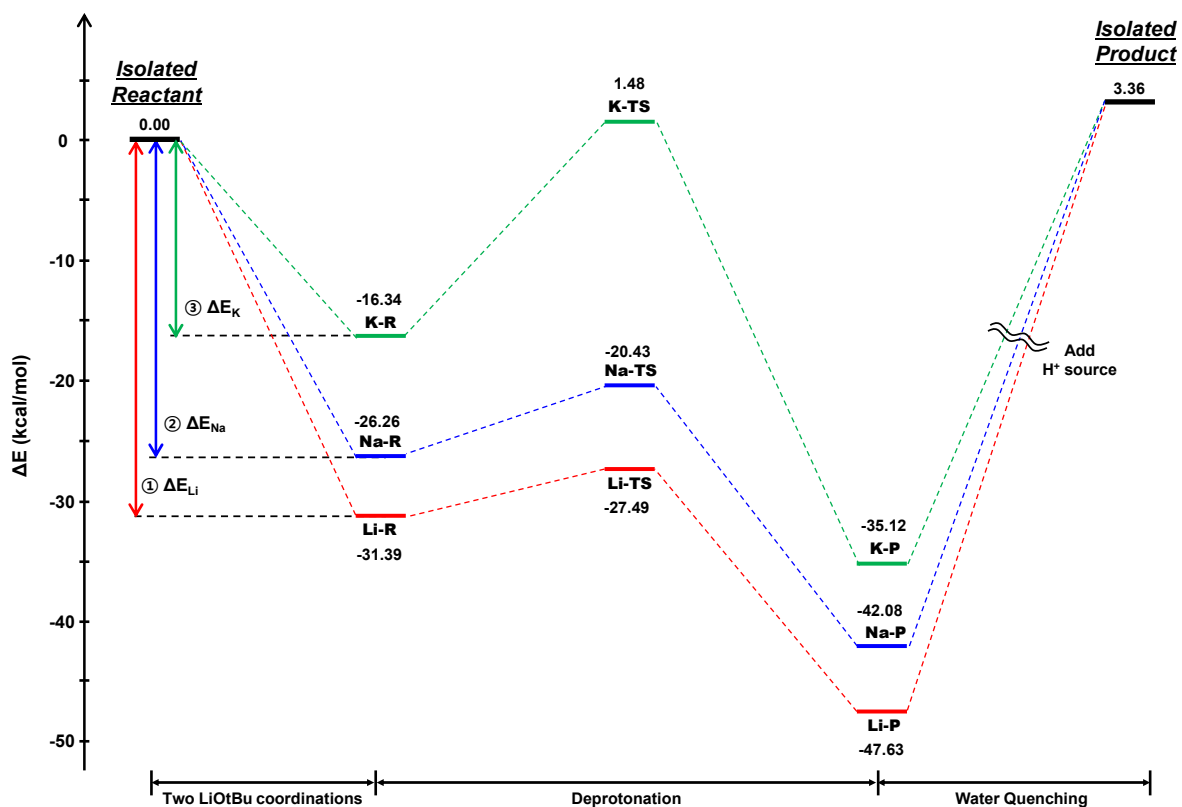

(b)

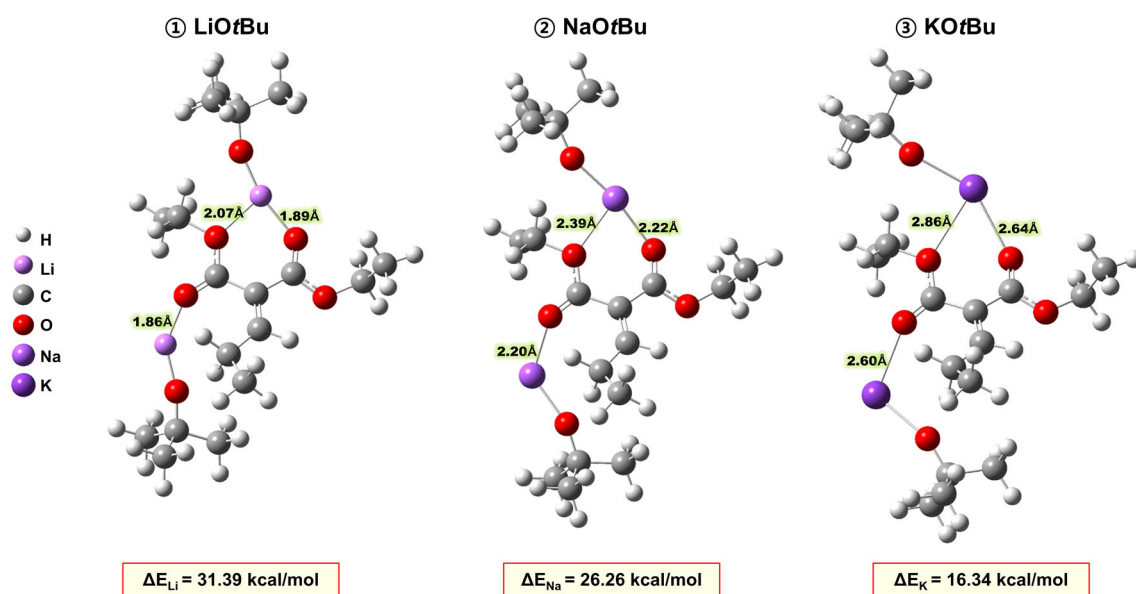

As shown in the energy profile calculation, the difference of stability energy for the Metal-O coordination compound is increased in the order of  $\Delta E_{\text{K}}$ ,  $\Delta E_{\text{Na}}$ , and  $\Delta E_{\text{Li}}$  (**Figure S2(a)**) and the coordination length is decreased in the order of K-O, Na-O, and Li-O (**Figure S2(b)**). This difference in coordination length occurs by the periodic property of the atom radius of each metal.

**Figure S3.** Four different possible deconjugation reaction pathways with LiOtBu. Since the energy of the **R4** and the activation energy of **TS4** (3.87kcal/mol) are the lowest in other pathways, 'Path 4' was selected as the most reasonable reaction pathway.

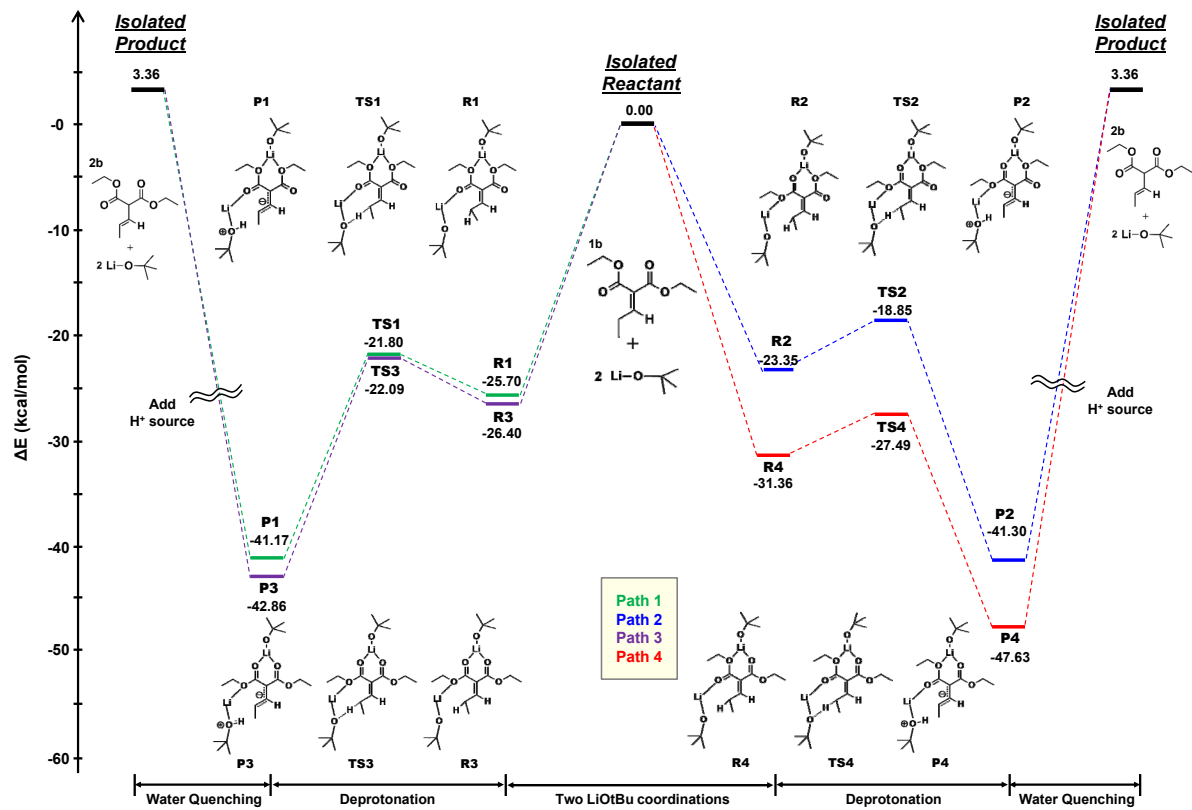

**Figure S4.** Deconjugation reaction pathways.

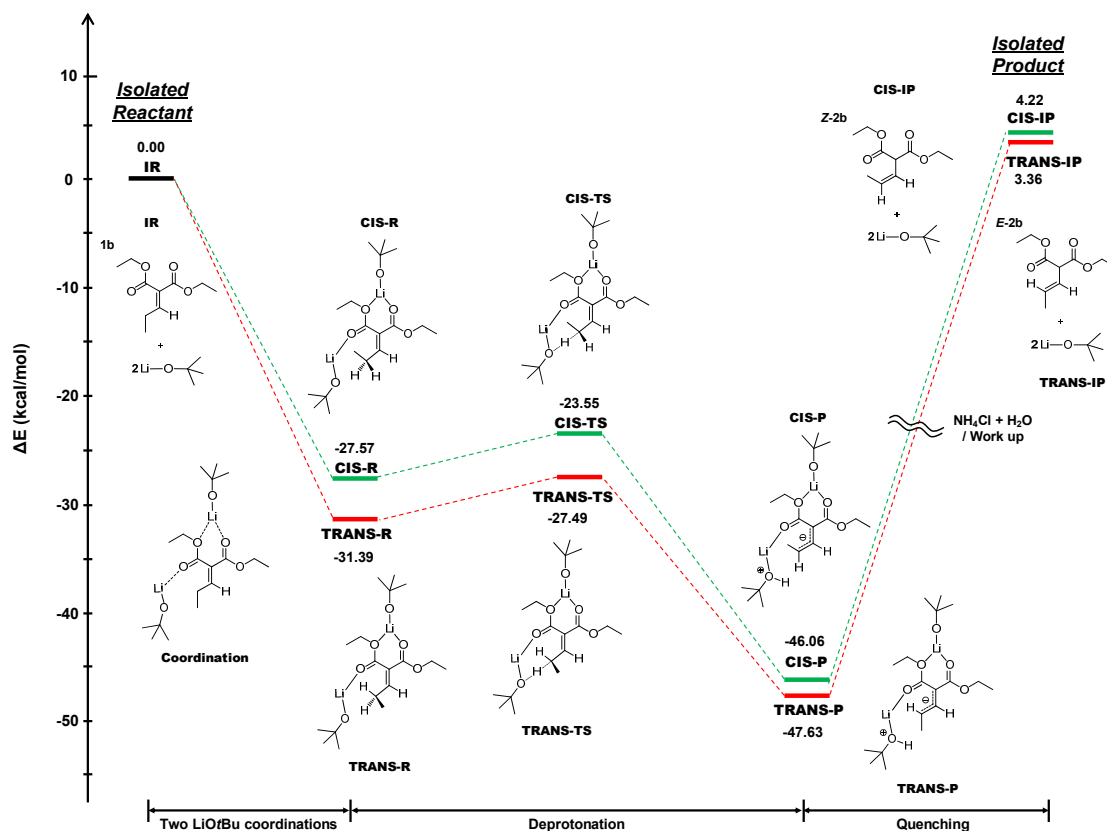

The substrate (**1b**) initially coordinates with two equivalents of LiOtBu to form stable coordination compounds via ion-dipole interactions with **TRANS-R** more stable than **CIS-R** by 3.82 kcal/mol. These compounds subsequently undergo  $\gamma$ -deprotonation with LiOtBu and form electronically delocalized anionic products **CIS-P** and **TRANS-P**. Moreover, the activation energies of both **TRANS-R** and **CIS-R** during deprotonation are similar ( $\sim 4$  kcal/mol). Therefore, the stability of  $\text{Li}^+$ -coordinated diesters determines the overall reaction pathway. The trans pathway is favoured due to less steric hindrance of **TRANS-R** with a low activation energy barrier of **TRANS-TS**.

**Figure S5.** AIMD screenshot of the conjugated molecule containing the CN group (**1k**). In the case of the conjugated molecule containing the CN group (**1k**), unlike the conjugated molecule containing the diester, the double coordinate with lithium of LiO*t*Bu is not formed. Namely, CN group is only formed the single coordination with LiO*t*Bu, which is free to move and form more stable LiO*t*Bu clusters. Therefore, deconjugation reaction of the cyano group does not occur as presented below, which is consistent with experimental result. We also performed ab initio molecular dynamics (AIMD) and confirmed the reaction mechanism of LiO*t*Bu cluster in the CN group. The following pictures are the snap shots of the cluster reaction for **1k** molecule over time.

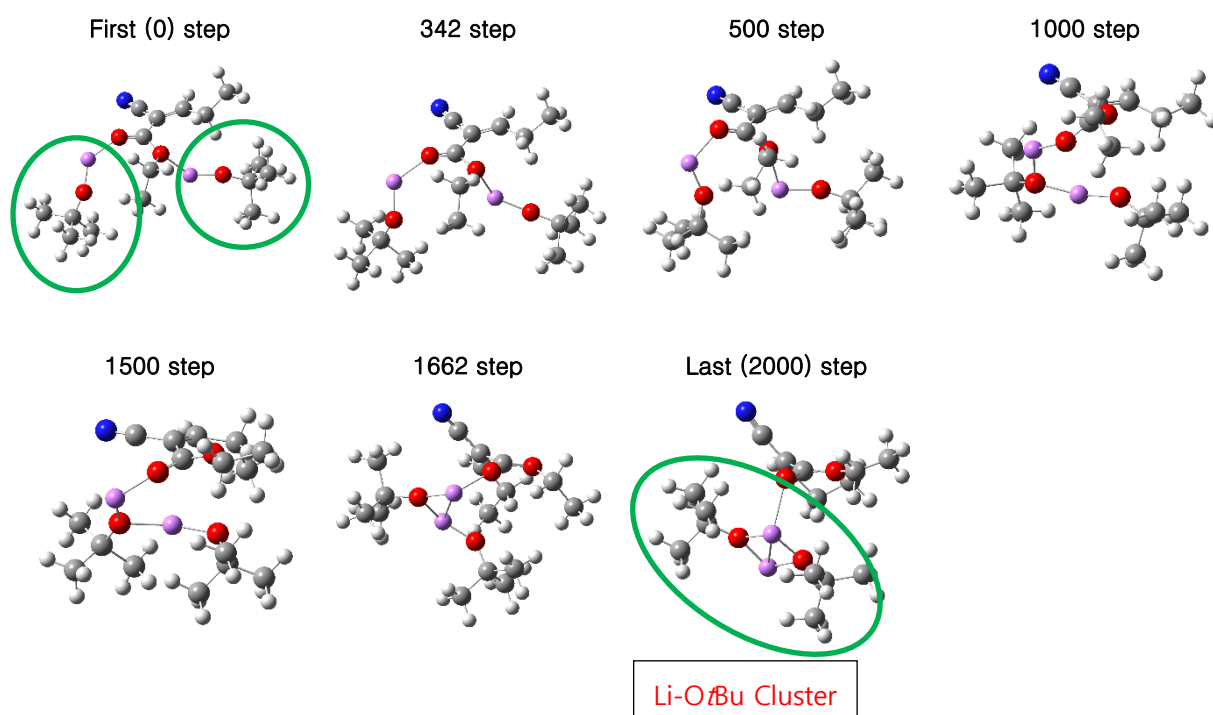

## Imaginary frequencies for all the transition states

Figure 1

TS1

---

| mode | symmetry | wave number          | IR intensity | selection rules |       |
|------|----------|----------------------|--------------|-----------------|-------|
|      |          | cm <sup>**(-1)</sup> | km/mol       | IR              | RAMAN |
| 1    | a        | -870.43              | 0.00000      | YES             | YES   |
| 2    |          | -0.00                | 0.00000      | -               | -     |
| 3    |          | -0.00                | 0.00000      | -               | -     |
| 4    |          | -0.00                | 0.00000      | -               | -     |
| 5    |          | 0.00                 | 0.00000      | -               | -     |
| 6    |          | 0.00                 | 0.00000      | -               | -     |
| 7    |          | 0.00                 | 0.00000      | -               | -     |
| 8    | a        | 14.34                | 0.02350      | YES             | YES   |
| 9    | a        | 16.66                | 0.50632      | YES             | YES   |
| 10   | a        | 23.28                | 0.02317      | YES             | YES   |

TS2- $\alpha$

---

| mode | symmetry | wave number          | IR intensity | selection rules |       |
|------|----------|----------------------|--------------|-----------------|-------|
|      |          | cm <sup>**(-1)</sup> | km/mol       | IR              | RAMAN |
| 1    | a        | -1171.76             | 0.00000      | YES             | YES   |
| 2    |          | -0.00                | 0.00000      | -               | -     |
| 3    |          | -0.00                | 0.00000      | -               | -     |
| 4    |          | -0.00                | 0.00000      | -               | -     |
| 5    |          | 0.00                 | 0.00000      | -               | -     |
| 6    |          | 0.00                 | 0.00000      | -               | -     |
| 7    |          | 0.00                 | 0.00000      | -               | -     |
| 8    | a        | 34.11                | 0.19359      | YES             | YES   |
| 9    | a        | 41.37                | 3.31799      | YES             | YES   |
| 10   | a        | 43.29                | 1.11552      | YES             | YES   |



TS2-y

---

| mode | symmetry | wave number | IR intensity | selection rules |       |
|------|----------|-------------|--------------|-----------------|-------|
|      |          | cm**(-1)    | km/mol       | IR              | RAMAN |
| 1    | a        | -1048.83    | 0.00000      | YES             | YES   |
| 2    |          | -0.00       | 0.00000      | -               | -     |
| 3    |          | 0.00        | 0.00000      | -               | -     |
| 4    |          | 0.00        | 0.00000      | -               | -     |
| 5    |          | 0.00        | 0.00000      | -               | -     |
| 6    |          | 0.00        | 0.00000      | -               | -     |
| 7    |          | 0.00        | 0.00000      | -               | -     |
| 8    | a        | 13.57       | 8.98272      | YES             | YES   |
| 9    | a        | 32.19       | 1.34708      | YES             | YES   |
| 10   | a        | 39.11       | 3.96145      | YES             | YES   |

**Figure 2 (a)**

TS<sub>1f-A</sub>

---

| mode | symmetry | wave number | IR intensity | selection rules |       |
|------|----------|-------------|--------------|-----------------|-------|
|      |          | cm**(-1)    | km/mol       | IR              | RAMAN |
| 1    | a        | -499.61     | 0.00000      | YES             | YES   |
| 2    |          | -0.00       | 0.00000      | -               | -     |
| 3    |          | -0.00       | 0.00000      | -               | -     |
| 4    |          | 0.00        | 0.00000      | -               | -     |
| 5    |          | 0.00        | 0.00000      | -               | -     |
| 6    |          | 0.00        | 0.00000      | -               | -     |
| 7    |          | 0.00        | 0.00000      | -               | -     |
| 8    | a        | 2.55        | 0.50355      | YES             | YES   |
| 9    | a        | 4.57        | 0.25960      | YES             | YES   |
| 10   | a        | 8.02        | 0.81733      | YES             | YES   |

TS<sub>1f-B</sub>

---

| mode | symmetry | wave number          | IR intensity | selection rules |       |
|------|----------|----------------------|--------------|-----------------|-------|
|      |          | cm <sup>**(-1)</sup> | km/mol       | IR              | RAMAN |
| 1    | a        | -1161.89             | 0.00000      | YES             | YES   |
| 2    |          | -0.00                | 0.00000      | -               | -     |
| 3    |          | -0.00                | 0.00000      | -               | -     |
| 4    |          | 0.00                 | 0.00000      | -               | -     |
| 5    |          | 0.00                 | 0.00000      | -               | -     |
| 6    |          | 0.00                 | 0.00000      | -               | -     |
| 7    |          | 0.00                 | 0.00000      | -               | -     |
| 8    | a        | 8.57                 | 0.36393      | YES             | YES   |
| 9    | a        | 12.29                | 0.13306      | YES             | YES   |
| 10   | a        | 18.86                | 0.09240      | YES             | YES   |

**Figure 2 (b)**

TS<sub>1g-A</sub>

---

| mode | symmetry | wave number          | IR intensity | selection rules |       |
|------|----------|----------------------|--------------|-----------------|-------|
|      |          | cm <sup>**(-1)</sup> | km/mol       | IR              | RAMAN |
| 1    | a        | -1165.29             | 0.00000      | YES             | YES   |
| 2    |          | -0.00                | 0.00000      | -               | -     |
| 3    |          | -0.00                | 0.00000      | -               | -     |
| 4    |          | -0.00                | 0.00000      | -               | -     |
| 5    |          | -0.00                | 0.00000      | -               | -     |
| 6    |          | -0.00                | 0.00000      | -               | -     |
| 7    |          | 0.00                 | 0.00000      | -               | -     |
| 8    | a        | 7.14                 | 0.31302      | YES             | YES   |
| 9    | a        | 16.50                | 0.82126      | YES             | YES   |
| 10   | a        | 20.86                | 0.70292      | YES             | YES   |

TS<sub>1g-B</sub>

---

| mode | symmetry | wave number | IR intensity | selection rules |       |
|------|----------|-------------|--------------|-----------------|-------|
|      |          | cm**(-1)    | km/mol       | IR              | RAMAN |
| 1    | a        | -628.77     | 0.00000      | YES             | YES   |
| 2    |          | -0.00       | 0.00000      | -               | -     |
| 3    |          | -0.00       | 0.00000      | -               | -     |
| 4    |          | -0.00       | 0.00000      | -               | -     |
| 5    |          | 0.00        | 0.00000      | -               | -     |
| 6    |          | 0.00        | 0.00000      | -               | -     |
| 7    |          | 0.00        | 0.00000      | -               | -     |
| 8    | a        | 8.90        | 0.13491      | YES             | YES   |
| 9    | a        | 16.73       | 0.88738      | YES             | YES   |
| 10   | a        | 21.58       | 0.04086      | YES             | YES   |

**Figure 2 (c)**

TS<sub>1h-A</sub>

---

| mode | symmetry | wave number | IR intensity | selection rules |       |
|------|----------|-------------|--------------|-----------------|-------|
|      |          | cm**(-1)    | km/mol       | IR              | RAMAN |
| 1    | a        | -366.81     | 0.00000      | YES             | YES   |
| 2    |          | -0.00       | 0.00000      | -               | -     |
| 3    |          | -0.00       | 0.00000      | -               | -     |
| 4    |          | -0.00       | 0.00000      | -               | -     |
| 5    |          | -0.00       | 0.00000      | -               | -     |
| 6    |          | -0.00       | 0.00000      | -               | -     |
| 7    |          | 0.00        | 0.00000      | -               | -     |
| 8    | a        | 10.56       | 0.53054      | YES             | YES   |
| 9    | a        | 12.24       | 1.64858      | YES             | YES   |
| 10   | a        | 13.81       | 0.64612      | YES             | YES   |

TS<sub>1h-B</sub>

---

| mode | symmetry | wave number          | IR intensity | selection rules |       |
|------|----------|----------------------|--------------|-----------------|-------|
|      |          | cm <sup>**(-1)</sup> | km/mol       | IR              | RAMAN |
| 1    | a        | -686.59              | 0.00000      | YES             | YES   |
| 2    |          | -0.00                | 0.00000      | -               | -     |
| 3    |          | -0.00                | 0.00000      | -               | -     |
| 4    |          | -0.00                | 0.00000      | -               | -     |
| 5    |          | 0.00                 | 0.00000      | -               | -     |
| 6    |          | 0.00                 | 0.00000      | -               | -     |
| 7    |          | 0.00                 | 0.00000      | -               | -     |
| 8    | a        | 4.99                 | 1.09839      | YES             | YES   |
| 9    | a        | 9.03                 | 0.05639      | YES             | YES   |
| 10   | a        | 17.43                | 0.02632      | YES             | YES   |

## Cartesian coordinates for all molecules

### Scheme 1 (C)

#### 1a

---

|   |            |            |            |
|---|------------|------------|------------|
| H | -0.7319000 | 2.6945000  | -0.3202000 |
| O | 0.8994187  | -0.7491827 | 3.4491132  |
| H | 3.8464382  | -2.6917955 | -0.6400979 |
| C | 2.7259187  | -2.7277898 | 3.3926474  |
| C | 0.9512000  | -1.5744000 | -0.1574000 |
| C | 3.1159408  | -2.8116662 | -1.4461211 |
| C | 0.4931000  | -0.9066000 | 1.0887000  |
| H | -1.7263000 | 2.2912000  | 1.0797000  |
| O | 1.0266000  | -1.0258000 | -1.2480000 |
| C | -1.1907000 | 0.6012000  | -0.1510000 |
| O | 1.2617000  | -2.8694000 | 0.0939000  |
| H | -2.0950000 | -0.0152000 | -0.2357000 |
| H | 3.5958635  | -3.3227419 | -2.2854912 |
| H | 3.3239853  | -1.8920661 | 3.7741825  |

|   |            |            |            |
|---|------------|------------|------------|
| C | 1.7991025  | -3.2844499 | 4.4587929  |
| H | 2.8231418  | -1.8064051 | -1.7665524 |
| H | -0.6951000 | 0.5970000  | 1.9683000  |
| H | 3.4279202  | -3.5081149 | 3.0802891  |
| C | -2.8152999 | 2.5548000  | -0.7178000 |
| C | 1.1313001  | -1.2951999 | 2.3809000  |
| H | -0.6386000 | 0.4437000  | -1.0840000 |
| H | 2.3737120  | -3.6503685 | 5.3148148  |
| H | 2.1847655  | -4.6052234 | -0.6655321 |
| C | -0.4257000 | 0.0855000  | 1.0443000  |
| H | 1.0996353  | -2.5229943 | 4.8169960  |
| O | 1.9989716  | -2.3322989 | 2.2184941  |
| C | -1.5772000 | 2.0776000  | 0.0128000  |
| H | 1.1798908  | -3.6824463 | -1.7789171 |
| H | 1.1972852  | -4.1060183 | 4.0577971  |
| C | 1.9076001  | -3.5882998 | -0.9661001 |
| C | -4.0684997 | 2.1685992  | -0.2111460 |
| C | -5.2515464 | 2.5390697  | -0.8535853 |
| H | -4.1281022 | 1.5708465  | 0.6965097  |
| C | -2.7830562 | 3.3184327  | -1.8917919 |
| C | -5.2010524 | 3.2990899  | -2.0178658 |
| H | -6.2103332 | 2.2318850  | -0.4445882 |
| C | -3.9682005 | 3.6887603  | -2.5356020 |
| H | -1.8437811 | 3.6402327  | -2.3317538 |
| H | -6.1198765 | 3.5869811  | -2.5211489 |
| H | -3.9271296 | 4.2818416  | -3.4456498 |

## 2a

-----

|   |           |            |            |
|---|-----------|------------|------------|
| H | 0.6797363 | 2.7232016  | -1.0777117 |
| O | 0.7984000 | -0.7622000 | 3.3844000  |
| H | 4.3485000 | -2.1895000 | -0.1673000 |
| C | 2.7634000 | -2.5963000 | 3.3160000  |
| C | 0.9590000 | -1.7769000 | -0.1295000 |

|   |            |            |            |
|---|------------|------------|------------|
| C | 3.7512000  | -2.4474000 | -1.0478000 |
| C | 0.2114000  | -1.1364000 | 1.0386000  |
| H | -0.2212065 | 2.9119067  | 0.4296924  |
| O | 0.8057000  | -1.5002000 | -1.3138000 |
| C | -0.1945000 | 0.9322000  | -0.3925000 |
| O | 1.8027000  | -2.7512000 | 0.3232000  |
| H | 4.4025000  | -2.9049000 | -1.7974000 |
| H | 3.1395000  | -1.6474000 | 3.7161000  |
| C | 2.0639000  | -3.4127000 | 4.3893000  |
| H | 3.3542000  | -1.5099000 | -1.4508000 |
| H | 3.6313000  | -3.1536000 | 2.9478000  |
| C | -1.4239441 | 2.9779577  | -1.3201013 |
| C | 0.9783000  | -1.3698000 | 2.3369000  |
| H | 2.7548000  | -3.6466000 | 5.2052000  |
| H | 3.0068000  | -4.3535000 | -0.3514000 |
| C | -0.0078000 | 0.3516000  | 0.8099000  |
| H | 1.2110000  | -2.8724000 | 4.8109000  |
| O | 1.9102000  | -2.3602000 | 2.1819000  |
| C | -0.2395000 | 2.4283000  | -0.5539000 |
| H | 1.9821000  | -3.5683000 | -1.5470000 |
| H | 1.6760000  | -4.3480000 | 3.9744000  |
| C | 2.6183000  | -3.3815000 | -0.6762000 |
| C | -1.3016402 | 3.2320355  | -2.6962046 |
| C | -2.3401309 | 3.8341046  | -3.4092000 |
| H | -0.3851769 | 2.9741895  | -3.2231408 |
| C | -2.6161457 | 3.3405868  | -0.6768155 |
| C | -3.5178518 | 4.1885013  | -2.7570486 |
| H | -2.2236879 | 4.0349046  | -4.4710823 |
| C | -3.6584312 | 3.9362731  | -1.3935122 |
| H | -2.7386691 | 3.1734938  | 0.3906239  |
| H | -4.3223532 | 4.6662203  | -3.3097540 |
| H | -4.5771675 | 4.2158102  | -0.8845328 |
| H | -0.2117000 | 0.3221000  | -1.2940000 |
| H | 0.0395000  | 0.9928000  | 1.6895000  |

|   |            |            |           |
|---|------------|------------|-----------|
| H | -0.7616000 | -1.6376000 | 1.1244000 |
|---|------------|------------|-----------|

**Figure 1**

**IR (1b)**

-----

|   |           |           |            |
|---|-----------|-----------|------------|
| H | 6.1574466 | 6.9238939 | 1.0523176  |
| O | 6.7906014 | 2.2988543 | 4.6643765  |
| H | 8.0749018 | 2.9296329 | -0.8422258 |
| C | 5.9686332 | 4.0153791 | 6.5677029  |
| C | 6.8644761 | 2.8730224 | 1.9038837  |
| C | 7.2942008 | 2.2257480 | -1.1667886 |
| C | 6.0606663 | 3.6986019 | 2.8723264  |
| H | 4.5242267 | 7.2524168 | 1.6773218  |
| O | 8.0642645 | 2.7689938 | 1.9521287  |
| C | 4.8678404 | 5.1544435 | 1.1315010  |
| O | 6.0916662 | 2.2724590 | 0.9771269  |
| H | 3.7947933 | 4.9321032 | 0.9744000  |
| H | 7.7400657 | 1.5396465 | -1.9053843 |
| H | 5.7747320 | 2.9468645 | 6.7452985  |
| C | 7.3362543 | 4.4138554 | 7.0984698  |
| H | 6.4899719 | 2.7882370 | -1.6678233 |
| H | 4.7623314 | 5.2530849 | 3.3327705  |
| H | 5.1694016 | 4.6088669 | 7.0363065  |
| H | 4.7702548 | 6.9799451 | -0.0642036 |
| C | 6.2898300 | 3.3394321 | 4.3072822  |
| H | 5.4111709 | 4.5789340 | 0.3694495  |
| H | 7.3706257 | 4.2689863 | 8.1907271  |
| H | 7.5689901 | 0.8888995 | 0.5206975  |
| C | 5.2257651 | 4.6937233 | 2.5121514  |
| H | 8.1254681 | 3.7951744 | 6.6458918  |
| O | 5.8453902 | 4.2855681 | 5.1590233  |
| C | 5.0931033 | 6.6621798 | 0.9397043  |
| H | 5.9875852 | 0.7134112 | -0.3044277 |
| H | 7.5487593 | 5.4731524 | 6.8841009  |

|   |           |           |           |
|---|-----------|-----------|-----------|
| C | 6.7575404 | 1.4315963 | 0.0135208 |
|---|-----------|-----------|-----------|

LiOfBu

---

|    |            |           |            |
|----|------------|-----------|------------|
| C  | -0.7934059 | 6.3472193 | -1.7858864 |
| H  | -0.2535329 | 6.4279923 | 1.6541723  |
| H  | -1.8000354 | 6.2464751 | 0.7866055  |
| C  | -0.7803157 | 6.6613066 | 0.7131805  |
| H  | 1.9475512  | 6.3718366 | 0.3632363  |
| H  | 1.3932892  | 7.7004249 | -0.6986595 |
| H  | 1.9366195  | 6.1492130 | -1.4052776 |
| H  | -0.8585774 | 7.7589126 | 0.6231273  |
| C  | -0.0355700 | 6.0109124 | -0.4781694 |
| Li | 0.1217016  | 3.0224671 | -0.1124071 |
| H  | -1.8129738 | 5.9279839 | -1.7440740 |
| O  | 0.0294340  | 4.6460609 | -0.3064711 |
| H  | -0.2759512 | 5.8884581 | -2.6457417 |
| H  | -0.8724538 | 7.4332208 | -1.9690791 |
| C  | 1.3917897  | 6.6049177 | -0.5609974 |

**R1**

---

|    |            |            |            |
|----|------------|------------|------------|
| C  | 11.6463509 | -0.7550733 | 3.8608800  |
| C  | 6.0754244  | 4.3238588  | 6.7761535  |
| H  | 5.7122320  | 5.0182164  | 0.6215362  |
| H  | 10.9830137 | -1.1766489 | 4.6345580  |
| O  | 2.9428359  | 3.2825075  | 0.2530579  |
| O  | 7.4881191  | 2.9343811  | 4.9664982  |
| H  | 1.3602487  | 1.9967469  | -1.4681742 |
| Li | 8.9096355  | 1.9952935  | 4.1455967  |
| H  | 1.1346235  | 2.9860890  | 2.1720751  |
| C  | 6.6868039  | 2.7939880  | 2.0956195  |
| H  | -0.1459772 | 3.9724666  | 1.4049368  |
| H  | 8.0738505  | 5.1787118  | 6.7041933  |



|    |            |            |            |
|----|------------|------------|------------|
| H  | 12.2091766 | 1.0610915  | 1.8613773  |
| H  | 7.7393165  | -0.6169991 | 2.5466825  |
| H  | 12.1980898 | 2.3049300  | 5.4277111  |
| C  | 11.6424430 | 0.7904076  | 3.9572446  |
| C  | 7.0924773  | 5.3845383  | 7.1579059  |
| H  | 1.0878096  | 1.3768243  | 0.1825515  |
| H  | 11.2589695 | -1.0716138 | 2.8776565  |
| H  | 5.0979223  | 4.5155378  | 7.2405015  |
| O  | 6.1178750  | 2.6105935  | 1.0213527  |
| H  | 6.4175398  | 3.3177196  | 7.0560387  |
| O  | 5.7969650  | 4.3391404  | 5.3541078  |
| C  | 4.9731818  | 5.2865844  | 1.3950454  |
| H  | 1.8090547  | 4.4789974  | -1.8380909 |
| H  | 13.2245345 | 0.8436566  | 5.5217288  |
| C  | 5.4263966  | 4.8433218  | 2.7305463  |
| H  | 4.0614982  | 4.6745944  | 1.1197394  |
| H  | 8.2906329  | 1.6050564  | 0.4599075  |
| H  | 7.2206403  | 5.3918511  | 8.2521443  |
| H  | -0.1726611 | 2.3555408  | -0.6231401 |
| H  | 12.5531798 | 2.4674834  | 2.8996630  |
| Li | 4.4617374  | 2.6434974  | 0.1854086  |
| C  | 0.9160284  | 2.2356863  | -0.4872618 |
| C  | 6.2036285  | 3.7781715  | 3.1021693  |
| H  | 9.3911668  | 1.0815236  | 1.8196691  |
| H  | 1.8087784  | 5.6034527  | -0.4553942 |
| C  | 12.5697850 | 1.3655748  | 2.8585951  |
| C  | 1.5843710  | 3.5003904  | 0.1001747  |
| H  | 13.6165058 | 1.0294124  | 2.9613563  |
| H  | 11.5468839 | 0.8045246  | 6.1389858  |
| H  | 6.7578760  | 6.3862575  | 6.8460642  |
| C  | 0.9443761  | 3.8162989  | 1.4720578  |
| C  | 7.6492746  | -0.1874969 | 1.5369236  |
| H  | 6.5862395  | -0.1230725 | 1.2593719  |
| O  | 10.3613815 | 1.2697777  | 3.7913447  |

|   |            |            |            |
|---|------------|------------|------------|
| O | 7.7816431  | 2.1182982  | 2.4171492  |
| H | 12.6525547 | -1.1913399 | 3.9900689  |
| C | 1.3445337  | 4.6884841  | -0.8602591 |
| C | 6.5731875  | 3.6281209  | 4.5409887  |
| H | 1.3935874  | 4.7283551  | 1.9002379  |
| C | 8.3532364  | 1.1521069  | 1.4583991  |
| H | 8.1420757  | -0.8828545 | 0.8382088  |
| C | 12.1965710 | 1.2050930  | 5.3423291  |
| H | 0.2719827  | 4.8921296  | -1.0223152 |
| H | 5.0981166  | 5.4714258  | 3.5654316  |
| C | 4.6157687  | 6.7748554  | 1.3264869  |
| H | 3.8403930  | 7.0330245  | 2.0664596  |
| H | 5.4894544  | 7.4212536  | 1.5122682  |
| H | 4.2174594  | 7.0254552  | 0.3317766  |

## TS1

-----

|    |            |            |            |
|----|------------|------------|------------|
| C  | 5.8406283  | -1.7370874 | -0.7880434 |
| C  | 0.4980335  | -1.1293284 | 3.9664289  |
| H  | -2.5114757 | 2.3360438  | -0.1991369 |
| H  | 5.7316944  | -1.9770565 | 0.2830232  |
| O  | -3.9617173 | 0.0746594  | -1.1448110 |
| O  | 1.5173535  | -0.4204792 | 1.6145844  |
| H  | -5.3347275 | -0.9955415 | -3.1502872 |
| Li | 2.7713741  | -0.0301372 | 0.2880271  |
| H  | -4.1742534 | -2.1863105 | 0.2416792  |
| C  | -0.1198589 | 0.7704997  | -0.5508406 |
| H  | -5.9535119 | -2.1665379 | 0.4085438  |
| H  | 2.0077654  | 0.4031145  | 4.2730028  |
| H  | 4.9563417  | -0.5757775 | -3.1405723 |
| H  | 2.1184292  | -1.2203387 | -2.5359523 |
| H  | 6.1216260  | 1.7086907  | -0.3718972 |
| C  | 5.4496478  | -0.2581201 | -1.0337164 |
| C  | 1.2443332  | -0.1419595 | 4.8477214  |

|    |            |            |            |
|----|------------|------------|------------|
| H  | -4.4144674 | -2.2703190 | -2.2995325 |
| H  | 5.1613622  | -2.3989669 | -1.3512381 |
| H  | -0.2496271 | -1.6934253 | 4.5425023  |
| O  | -0.9110690 | 1.0251347  | -1.4727991 |
| H  | 1.1897288  | -1.8366874 | 3.4866980  |
| O  | -0.2727162 | -0.4628123 | 2.9441447  |
| C  | -2.8522487 | 1.7006100  | 0.6338056  |
| H  | -6.4055052 | 0.8997855  | -1.8251140 |
| H  | 7.4633157  | 0.5305436  | -0.5038099 |
| C  | -1.8083324 | 0.9753817  | 1.2768897  |
| H  | -3.4779456 | 0.8171518  | -0.0753922 |
| H  | 1.1056488  | 1.6974867  | -2.6277928 |
| H  | 1.7537894  | -0.6845372 | 5.6603491  |
| H  | -6.1939174 | -2.2154437 | -2.1735893 |
| H  | 5.3763010  | 1.1118698  | -2.7389994 |
| Li | -2.5668581 | 0.5501380  | -2.0260639 |
| C  | -5.2835854 | -1.5956545 | -2.2264161 |
| C  | -0.5492244 | 0.5497571  | 0.8332411  |
| H  | 2.7215824  | 1.0877661  | -2.0412793 |
| H  | -6.2705946 | 0.9372862  | -0.0482529 |
| C  | 5.6325799  | 0.0569229  | -2.5407082 |
| C  | -5.1452061 | -0.6766126 | -0.9984886 |
| H  | 6.6649718  | -0.1157396 | -2.8923527 |
| H  | 6.3041084  | 0.4297570  | 0.8551754  |
| H  | 0.5531457  | 0.5854377  | 5.3020695  |
| C  | -5.0605987 | -1.5326882 | 0.2802546  |
| C  | 1.5158055  | -0.4223038 | -2.9945082 |
| H  | 0.4684345  | -0.7487873 | -3.0863101 |
| O  | 4.1447348  | -0.0410491 | -0.6551022 |
| O  | 1.1854543  | 0.6782643  | -0.8107225 |
| H  | 6.8781677  | -1.9663367 | -1.0898619 |
| C  | -6.3570941 | 0.2708550  | -0.9213921 |
| C  | 0.3345103  | -0.1392844 | 1.7939978  |
| H  | -4.9714945 | -0.8913861 | 1.1722021  |

|   |            |            |            |
|---|------------|------------|------------|
| C | 1.6586188  | 0.8553103  | -2.1911021 |
| H | 1.9104662  | -0.2486843 | -4.0089654 |
| C | 6.4026431  | 0.6530436  | -0.2205711 |
| H | -7.3065832 | -0.2826607 | -0.8336809 |
| H | -2.0249476 | 0.6691919  | 2.3057861  |
| C | -3.8816516 | 2.3862225  | 1.5292729  |
| H | -4.2282956 | 1.7129473  | 2.3314815  |
| H | -3.4794756 | 3.2946288  | 2.0106417  |
| H | -4.7676912 | 2.6879569  | 0.9486614  |

**P**

-----

|    |            |            |            |
|----|------------|------------|------------|
| C  | 4.7724362  | -1.8164316 | -2.1634702 |
| C  | 1.0322444  | 0.0850072  | 4.5786645  |
| H  | -2.5991241 | 2.8325362  | 0.5015029  |
| H  | 4.2459230  | -2.6334314 | -1.6413112 |
| O  | -4.3592325 | -0.3822427 | -0.4720969 |
| O  | 1.6042557  | 0.1407120  | 1.9942324  |
| H  | -4.4592678 | 0.5857302  | -2.9412417 |
| Li | 2.5541734  | 0.1495556  | 0.3966486  |
| H  | -2.8995474 | -2.4633744 | -1.3469578 |
| C  | -0.3923824 | 0.9555155  | -0.0364697 |
| H  | -4.1632323 | -3.1862754 | -2.3779099 |
| H  | 2.5905356  | 1.5521650  | 4.2226036  |
| H  | 5.0950316  | 0.8550087  | -2.7995388 |
| H  | 1.3497515  | -1.5681232 | -1.9554478 |
| H  | 6.0214807  | -0.2560133 | 0.6879774  |
| C  | 4.9702072  | -0.6226172 | -1.1928570 |
| C  | 1.9494585  | 1.2040080  | 5.0458209  |
| H  | -2.9095250 | -0.2619851 | -2.6547186 |
| H  | 4.1467508  | -1.5040114 | -3.0167960 |
| H  | 0.4094430  | -0.2856552 | 5.4073388  |
| O  | -1.3378072 | 1.1150139  | -0.8490052 |
| H  | 1.6141836  | -0.7527988 | 4.1673664  |

|    |            |            |            |
|----|------------|------------|------------|
| O  | 0.0905907  | 0.5390126  | 3.5943381  |
| C  | -2.7579027 | 2.3465421  | 1.4766965  |
| H  | -6.6002804 | -0.2784116 | -1.9175582 |
| H  | 6.8499006  | -1.4650921 | -0.3379101 |
| C  | -1.8031974 | 1.5080612  | 1.9711508  |
| H  | -4.8113553 | -0.7875798 | 0.2823336  |
| H  | 0.4127494  | 1.3309570  | -2.4613335 |
| H  | 2.6016066  | 0.8411603  | 5.8573691  |
| H  | -4.1155230 | -0.9527266 | -3.7692029 |
| H  | 5.8442859  | 1.3741416  | -1.2701104 |
| Li | -3.0088821 | 0.8888284  | -0.1863031 |
| C  | -3.9886292 | -0.4037695 | -2.8243045 |
| C  | -0.5598006 | 1.0063428  | 1.3894335  |
| H  | 2.0970363  | 0.7461698  | -2.0859751 |
| H  | -6.6085641 | -1.8043561 | -0.9862162 |
| C  | 5.7062177  | 0.5143125  | -1.9464778 |
| C  | -4.6302008 | -1.1780505 | -1.6734260 |
| H  | 6.6962124  | 0.2087738  | -2.3299864 |
| H  | 5.3505035  | -1.9004385 | 0.5364280  |
| H  | 1.3672047  | 2.0578184  | 5.4276970  |
| C  | -3.9866974 | -2.5554254 | -1.4930872 |
| C  | 0.6864122  | -0.8386570 | -2.4438895 |
| H  | -0.3653411 | -1.1027037 | -2.2520771 |
| O  | 3.7555316  | -0.1775339 | -0.7338660 |
| O  | 0.8354544  | 0.6934016  | -0.5239735 |
| H  | 5.7234992  | -2.2145359 | -2.5606948 |
| C  | -6.1481514 | -1.2792474 | -1.8406368 |
| C  | 0.4703601  | 0.5335551  | 2.2921368  |
| H  | -4.4110996 | -3.0801728 | -0.6204310 |
| C  | 1.0203986  | 0.5621363  | -1.9657349 |
| H  | 0.8640042  | -0.9017423 | -3.5303294 |
| C  | 5.8614608  | -1.0921558 | -0.0139386 |
| H  | -6.4018122 | -1.8449058 | -2.7504502 |
| H  | -1.9576004 | 1.1791137  | 3.0043334  |

|   |            |           |           |
|---|------------|-----------|-----------|
| C | -3.9336354 | 2.8410121 | 2.2801114 |
| H | -3.9910722 | 2.3359638 | 3.2577778 |
| H | -3.8599191 | 3.9274216 | 2.4714321 |
| H | -4.9016985 | 2.6881430 | 1.7671698 |

## R2

---

|   |            |            |            |
|---|------------|------------|------------|
| C | 1.7826906  | -2.3216439 | 2.9333526  |
| H | -3.2431299 | 1.0990374  | 1.7863157  |
| O | 1.8604190  | -0.0794174 | 1.5886729  |
| C | -0.6499161 | 1.3819435  | 0.8154191  |
| H | 2.5892618  | -0.7257443 | 4.1687395  |
| H | -0.0229031 | 1.1692308  | -2.6854914 |
| C | 2.2705997  | -1.7744440 | 4.2663526  |
| H | 1.4919106  | -3.3782464 | 3.0284034  |
| O | -1.5833129 | 2.1592203  | 0.7489286  |
| H | 2.5632473  | -2.2441413 | 2.1626326  |
| O | 0.5856459  | -1.6729703 | 2.4795631  |
| C | -3.0176258 | 0.2110319  | 2.3811312  |
| C | -1.7579933 | -0.2658548 | 2.4084317  |
| H | -0.1133442 | 3.4330726  | -0.5910990 |
| H | 3.1341571  | -2.3618872 | 4.6194030  |
| C | -0.5510046 | 0.2345640  | 1.7263334  |
| H | 1.3877015  | 2.7472145  | -1.3002991 |
| H | 1.4789828  | -1.8331017 | 5.0299733  |
| C | -0.4447988 | 2.0939926  | -2.2614054 |
| H | -1.4983803 | 1.9160907  | -2.0004814 |
| O | 0.4144257  | 1.4994747  | -0.0458021 |
| C | 0.6414106  | -0.4627451 | 1.9043575  |
| C | 0.3396765  | 2.5319318  | -1.0335659 |
| H | -0.4087484 | 2.8789654  | -3.0350343 |
| H | -1.5735022 | -1.1521990 | 3.0230213  |
| C | -4.1543509 | -0.4122169 | 3.1391693  |
| H | -3.8328238 | -1.2967065 | 3.7136558  |

|   |            |            |            |
|---|------------|------------|------------|
| H | -4.6121324 | 0.3029730  | 3.8482889  |
| H | -4.9685145 | -0.7287552 | 2.4605335  |
| H | 3.1612928  | 2.6925799  | 2.5495148  |
| H | 1.9713712  | 0.9262083  | 1.5574488  |
| H | 1.5448547  | 2.9628351  | 2.4333956  |
| H | 2.4910972  | 3.1061920  | 1.1060716  |
| N | 2.3459599  | 2.5498194  | 1.9502043  |
| H | -1.9313982 | -1.8552412 | -0.9546109 |
| H | -0.4441509 | -1.2337449 | -1.6646647 |
| H | -0.8070762 | -1.0794198 | 0.0469413  |
| H | -0.4966935 | -2.6280830 | -0.5809227 |
| N | -0.9325480 | -1.7232549 | -0.7759396 |

### TS2- $\alpha$

-----

|   |            |            |            |
|---|------------|------------|------------|
| C | 2.0461396  | -2.3288859 | 2.9174317  |
| H | -3.0249100 | 1.0018978  | 1.4545801  |
| O | 1.9729592  | 0.0838289  | 1.7428364  |
| C | -0.3820732 | 1.2877887  | 0.7092261  |
| H | 2.3547399  | -0.8493938 | 4.4821478  |
| H | -0.8771274 | 1.4971393  | -2.9686888 |
| C | 2.1947870  | -1.9332537 | 4.3749981  |
| H | 1.9083742  | -3.4142155 | 2.8124733  |
| O | -0.8128659 | 2.3658362  | 1.0664749  |
| H | 2.9150045  | -2.0193144 | 2.3205437  |
| O | 0.8457486  | -1.7664872 | 2.3241484  |
| C | -2.8528412 | 0.1744074  | 2.1537639  |
| C | -1.6204951 | -0.3572995 | 2.2582429  |
| H | 0.4545724  | 3.1660285  | -0.7376571 |
| H | 3.0684921  | -2.4462426 | 4.8075130  |
| C | -0.4147961 | 0.0080248  | 1.4742557  |
| H | 1.3303891  | 2.0954893  | -1.8820991 |
| H | 1.3069084  | -2.2203466 | 4.9591659  |
| C | -0.7759624 | 2.3994126  | -2.3441732 |

|   |            |            |            |
|---|------------|------------|------------|
| H | -1.7245173 | 2.5803102  | -1.8161605 |
| O | 0.2054110  | 1.1112437  | -0.5047232 |
| C | 0.8580486  | -0.5160843 | 1.8540559  |
| C | 0.3749410  | 2.2651780  | -1.3633728 |
| H | -0.5950248 | 3.2526823  | -3.0166913 |
| H | -1.4602024 | -1.1664456 | 2.9791999  |
| C | -4.0271281 | -0.2349958 | 2.9932869  |
| H | -3.7794250 | -1.0654457 | 3.6728196  |
| H | -4.3876862 | 0.6092417  | 3.6075934  |
| H | -4.8846153 | -0.5448568 | 2.3695718  |
| H | 2.3505857  | 2.7299930  | 3.1140933  |
| H | 1.9843190  | 1.3270429  | 1.9162156  |
| H | 1.0211391  | 2.9050465  | 2.1164635  |
| H | 2.5615444  | 3.0724168  | 1.5077136  |
| N | 1.9865252  | 2.5495457  | 2.1745258  |
| H | -2.0352818 | -1.8099035 | -0.5889738 |
| H | -0.6167656 | -1.4850968 | -1.4266625 |
| H | -0.6925818 | -1.0510195 | 0.2971982  |
| H | -0.6712747 | -2.7341641 | -0.3057285 |
| N | -1.0120970 | -1.7953366 | -0.5341163 |

### TS2-y

-----

|   |            |            |            |
|---|------------|------------|------------|
| C | 1.7826906  | -2.3216439 | 2.9333526  |
| H | -3.2431299 | 1.0990374  | 1.7863157  |
| O | 1.8604190  | -0.0794174 | 1.5886729  |
| C | -0.6499161 | 1.3819435  | 0.8154191  |
| H | 2.5892618  | -0.7257443 | 4.1687395  |
| H | -0.0229031 | 1.1692308  | -2.6854914 |
| C | 2.2705997  | -1.7744440 | 4.2663526  |
| H | 1.4919106  | -3.3782464 | 3.0284034  |
| O | -1.5833129 | 2.1592203  | 0.7489286  |
| H | 2.5632473  | -2.2441413 | 2.1626326  |
| O | 0.5856459  | -1.6729703 | 2.4795631  |



|   |            |            |            |
|---|------------|------------|------------|
| C | -3.0176258 | 0.2110319  | 2.3811312  |
| C | -1.7579933 | -0.2658548 | 2.4084317  |
| H | -0.1133442 | 3.4330726  | -0.5910990 |
| H | 3.1341571  | -2.3618872 | 4.6194030  |
| C | -0.5510046 | 0.2345640  | 1.7263334  |
| H | 1.3877015  | 2.7472145  | -1.3002991 |
| H | 1.4789828  | -1.8331017 | 5.0299733  |
| C | -0.4447988 | 2.0939926  | -2.2614054 |
| H | -1.4983803 | 1.9160907  | -2.0004814 |
| O | 0.4144257  | 1.4994747  | -0.0458021 |
| C | 0.6414106  | -0.4627451 | 1.9043575  |
| C | 0.3396765  | 2.5319318  | -1.0335659 |
| H | -0.4087484 | 2.8789654  | -3.0350343 |
| H | -1.5735022 | -1.1521990 | 3.0230213  |
| C | -4.1543509 | -0.4122169 | 3.1391693  |
| H | -3.8328238 | -1.2967065 | 3.7136558  |
| H | -4.6121324 | 0.3029730  | 3.8482889  |
| H | -4.9685145 | -0.7287552 | 2.4605335  |
| H | 3.1612928  | 2.6925799  | 2.5495148  |
| H | 1.9713712  | 0.9262083  | 1.5574488  |
| H | 1.5448547  | 2.9628351  | 2.4333956  |
| H | 2.4910972  | 3.1061920  | 1.1060716  |
| N | 2.3459599  | 2.5498194  | 1.9502043  |
| H | -3.2655555 | -2.8033134 | 0.7875447  |
| H | -3.4379699 | -1.6235264 | -0.5088797 |
| H | -2.9360008 | -0.8704003 | 1.3887896  |
| H | -1.8769835 | -2.1255335 | 0.1489597  |
| N | -2.8543754 | -1.9518322 | 0.3964477  |

**IP (E-2b)**

-----

|   |            |            |           |
|---|------------|------------|-----------|
| C | 0.9584703  | 0.4007858  | 4.4700085 |
| H | -3.2769208 | 0.9418645  | 0.5752475 |
| O | 0.2253282  | -0.4778261 | 2.0145609 |

|   |            |            |            |
|---|------------|------------|------------|
| C | -0.5797246 | 1.1999721  | -0.0495324 |
| H | 2.7250364  | -0.1643577 | 3.3435958  |
| H | 2.1815362  | -0.8525901 | -0.9447377 |
| C | 2.4659683  | 0.3313487  | 4.2912410  |
| H | 0.6892755  | 0.8675390  | 5.4289114  |
| O | -1.4605498 | 0.7487547  | -0.7371292 |
| H | 0.5071282  | -0.6011767 | 4.4176095  |
| O | 0.3436657  | 1.2411395  | 3.4714067  |
| C | -3.2562613 | 1.5524482  | 1.4820671  |
| C | -2.0757528 | 1.9816615  | 1.9457650  |
| H | 0.2096094  | 0.9922048  | -2.4502309 |
| H | 2.9137771  | -0.2487181 | 5.1145170  |
| C | -0.6925786 | 1.6925808  | 1.3915510  |
| H | 1.9124623  | 1.4019758  | -2.0727605 |
| H | 2.9109995  | 1.3388708  | 4.2983683  |
| C | 1.3753957  | -0.6706090 | -1.6721593 |
| H | 0.4943212  | -1.2540896 | -1.3663025 |
| O | 0.6932433  | 1.3423868  | -0.4606604 |
| C | 0.0163752  | 0.6749256  | 2.2985432  |
| C | 1.0418356  | 0.8099448  | -1.7539314 |
| H | 1.7064960  | -1.0343294 | -2.6586362 |
| H | -2.0503145 | 2.5858872  | 2.8610752  |
| C | -4.5746770 | 1.8725290  | 2.1217120  |
| H | -4.4599918 | 2.4894659  | 3.0272205  |
| H | -5.2353798 | 2.4116184  | 1.4193946  |
| H | -5.1113678 | 0.9481592  | 2.4009404  |
| H | -0.0914054 | 2.6145336  | 1.4575451  |

**Figure 2 (a)**

**1f**

-----

|   |           |           |            |
|---|-----------|-----------|------------|
| H | 6.3044168 | 6.6682018 | 0.4928378  |
| O | 7.8845904 | 3.9395231 | 4.1627204  |
| H | 5.9124640 | 1.3551822 | -0.5562027 |

|   |           |           |            |
|---|-----------|-----------|------------|
| C | 6.3486989 | 2.6366273 | 5.9516024  |
| C | 6.5657614 | 3.6105720 | 1.3889444  |
| C | 6.6944715 | 0.7628595 | -0.0579582 |
| C | 6.0699685 | 4.2772776 | 2.6282498  |
| H | 5.4408392 | 7.7998067 | 1.5479966  |
| O | 6.4734148 | 4.0354666 | 0.2571455  |
| C | 4.5147742 | 5.8325089 | 1.3625158  |
| O | 7.1376880 | 2.4254218 | 1.6843756  |
| H | 3.4933917 | 6.1694742 | 1.6151034  |
| H | 7.1881043 | 0.1374754 | -0.8196362 |
| H | 7.3529125 | 2.2253448 | 5.7693840  |
| C | 6.3845431 | 3.6770018 | 7.0597722  |
| H | 6.2191562 | 0.0966898 | 0.6794466  |
| C | 4.6699500 | 5.9292623 | 3.8892489  |
| H | 5.6620095 | 1.8138009 | 6.1998752  |
| C | 4.6148874 | 7.6425099 | -0.4483950 |
| C | 6.7154098 | 3.7939183 | 3.9028636  |
| H | 4.4308693 | 5.0579880 | 0.5886712  |
| H | 6.7148101 | 3.2092835 | 8.0016752  |
| H | 8.1574743 | 2.3670720 | -0.1209178 |
| C | 5.1447780 | 5.2718229 | 2.6188669  |
| H | 7.0912822 | 4.4838587 | 6.8150189  |
| O | 5.8366282 | 3.1770351 | 4.7178644  |
| C | 5.2997033 | 7.0228467 | 0.7739538  |
| H | 8.5224513 | 1.0866032 | 1.0784290  |
| H | 5.3867985 | 4.1132359 | 7.2275822  |
| C | 7.7173111 | 1.6694907 | 0.6072957  |
| H | 4.6656055 | 7.0250993 | 3.7650032  |
| H | 5.2678676 | 5.6801048 | 4.7736868  |
| H | 3.6251666 | 5.6332635 | 4.0910634  |
| H | 4.4792547 | 6.8606687 | -1.2172598 |
| C | 5.3915767 | 8.8180427 | -1.0446413 |
| H | 3.5968494 | 7.9737719 | -0.1708565 |
| H | 6.4011449 | 8.5088946 | -1.3636712 |

|   |           |           |            |
|---|-----------|-----------|------------|
| H | 5.5133716 | 9.6332718 | -0.3109791 |
| H | 4.8778416 | 9.2372764 | -1.9249320 |

**R<sub>1f-A</sub>**

-----

|   |            |            |            |
|---|------------|------------|------------|
| H | 3.2742007  | 6.7091395  | 4.2412324  |
| O | 8.5531601  | 3.3309801  | 4.6743885  |
| H | 8.6907264  | 1.2555600  | 0.8904355  |
| C | 9.4847208  | 5.7480627  | 5.3732750  |
| C | 6.3713030  | 3.1733919  | 2.6807465  |
| C | 7.6027150  | 1.2164214  | 0.7187915  |
| C | 6.5013068  | 4.2008417  | 3.7667850  |
| H | 2.9400599  | 5.3401683  | 5.3072191  |
| O | 5.5134077  | 3.1552973  | 1.8089074  |
| C | 4.0611035  | 4.8285495  | 3.5014476  |
| O | 6.8994153  | 1.9901148  | 2.9578402  |
| H | 3.7896767  | 3.7639274  | 3.5553687  |
| H | 7.4119427  | 0.4268026  | -0.0261677 |
| H | 9.6603827  | 4.9282570  | 6.0837219  |
| C | 10.6085182 | 5.8562181  | 4.3588036  |
| H | 7.2646427  | 2.1693131  | 0.2827857  |
| C | 5.5079412  | 6.0480598  | 5.1834136  |
| H | 9.3477968  | 6.6875259  | 5.9271994  |
| C | 1.5935457  | 5.4899181  | 3.6071112  |
| C | 7.8371679  | 4.2927228  | 4.4312921  |
| H | 4.0437921  | 5.1049357  | 2.4368750  |
| H | 11.5480482 | 6.1016705  | 4.8793085  |
| H | 7.1597828  | -0.0266815 | 2.4654878  |
| C | 5.4301417  | 4.9776363  | 4.1204824  |
| H | 10.7558627 | 4.9054904  | 3.8250128  |
| O | 8.2027407  | 5.5346761  | 4.7230683  |
| C | 2.9787481  | 5.6446967  | 4.2456431  |
| H | 5.7224003  | 0.8476349  | 1.7897781  |
| H | 10.4044215 | 6.6517670  | 3.6256382  |

|    |            |            |           |
|----|------------|------------|-----------|
| C  | 6.8106754  | 0.8888249  | 1.9676762 |
| H  | 4.5045917  | 6.2819332  | 5.5658381 |
| H  | 5.9294521  | 6.9715204  | 4.7531125 |
| H  | 6.1541838  | 5.7744535  | 6.0269141 |
| H  | 1.6498239  | 5.8108082  | 2.5514436 |
| C  | 0.5077687  | 6.2833154  | 4.3356984 |
| H  | 1.3221847  | 4.4181721  | 3.5908255 |
| H  | 0.7363602  | 7.3627222  | 4.3420132 |
| H  | 0.4000984  | 5.9609457  | 5.3858886 |
| H  | -0.4710482 | 6.1586158  | 3.8459825 |
| C  | 11.0579347 | -0.7670566 | 2.4345755 |
| H  | 10.3563138 | -1.0871358 | 5.8301526 |
| H  | 11.5288348 | 0.0037071  | 5.0437796 |
| C  | 11.0003858 | -0.9596635 | 4.9435583 |
| H  | 8.7273414  | -2.4437054 | 4.4075729 |
| H  | 10.0948118 | -3.1674056 | 3.5081767 |
| H  | 8.7833088  | -2.3281349 | 2.6309554 |
| H  | 11.7538499 | -1.7672107 | 4.9470354 |
| C  | 10.1317900 | -0.9501056 | 3.6618111 |
| Li | 8.5097688  | 1.4977977  | 4.2104986 |
| H  | 11.5689697 | 0.2082906  | 2.4980993 |
| O  | 9.2127736  | 0.0770284  | 3.7147415 |
| H  | 10.4617054 | -0.7746300 | 1.5065692 |
| H  | 11.8257165 | -1.5567857 | 2.3547833 |
| C  | 9.4007497  | -2.3092796 | 3.5448247 |
| C  | 2.8583474  | 0.1234476  | 4.3138450 |
| H  | 2.3148233  | 3.3311704  | 5.5596043 |
| H  | 3.7163227  | 2.2666427  | 5.8394610 |
| C  | 2.6402279  | 2.2782618  | 5.5980095 |
| H  | 0.5351282  | 2.6771031  | 3.8499494 |
| H  | 0.2789479  | 1.1072357  | 4.6641331 |
| H  | 0.7029828  | 1.1622522  | 2.9274830 |
| H  | 2.0974251  | 1.7807817  | 6.4207339 |
| C  | 2.4003394  | 1.5991891  | 4.2279090 |

|    |           |            |           |
|----|-----------|------------|-----------|
| Li | 3.9419764 | 3.0325095  | 2.0837360 |
| H  | 3.9357149 | 0.0763684  | 4.5448168 |
| O  | 3.1080067 | 2.2571353  | 3.2436553 |
| H  | 2.6994944 | -0.3741661 | 3.3423897 |
| H  | 2.3155039 | -0.4477942 | 5.0870913 |
| C  | 0.8866304 | 1.6333842  | 3.9074229 |

**TS<sub>1f-A</sub>**

-----

|   |            |            |            |
|---|------------|------------|------------|
| H | -3.5314932 | 2.4932814  | -1.6180822 |
| O | 1.9362369  | 1.3123982  | 1.0022335  |
| H | 2.5937118  | -0.7338082 | -3.3207023 |
| C | 1.4976954  | 3.9250668  | 1.1619980  |
| C | 0.2399935  | -0.4160958 | -0.6380951 |
| C | 2.0090203  | -1.6115582 | -3.0037066 |
| C | -0.1908190 | 0.8441825  | -0.0374239 |
| H | -4.4967561 | 1.6179196  | -0.4355928 |
| O | -0.5222234 | -1.3352635 | -0.9836498 |
| C | -2.5742427 | 0.6615409  | -0.8891632 |
| O | 1.5621281  | -0.5760693 | -0.8187660 |
| H | -3.0739376 | -0.3466147 | -0.1772468 |
| H | 2.4563935  | -2.5007343 | -3.4772152 |
| H | 1.9771857  | 3.4387398  | 2.0235727  |
| C | 2.5305910  | 4.4050940  | 0.1566862  |
| H | 0.9777256  | -1.5084632 | -3.3762235 |
| C | -2.0435988 | 2.3654532  | 0.8320631  |
| H | 0.8731027  | 4.7576750  | 1.5188608  |
| C | -4.5927745 | 0.7940608  | -2.4264145 |
| C | 0.8557689  | 1.6989631  | 0.5589953  |
| H | -2.1671579 | 0.1018666  | -1.7429830 |
| H | 3.1766478  | 5.1660799  | 0.6236765  |
| H | 3.0893496  | -1.8538407 | -1.1116145 |
| C | -1.5588988 | 1.2570752  | -0.0756899 |
| H | 3.1700734  | 3.5752401  | -0.1785922 |

|    |            |            |            |
|----|------------|------------|------------|
| O  | 0.5604883  | 3.0061578  | 0.5616892  |
| C  | -3.8148340 | 1.4737923  | -1.2931592 |
| H  | 1.4598060  | -2.6350615 | -1.1588616 |
| H  | 2.0452449  | 4.8580335  | -0.7220769 |
| C  | 2.0580627  | -1.7782886 | -1.4974878 |
| H  | -3.0767315 | 2.1558084  | 1.1413532  |
| H  | -2.0566644 | 3.3271513  | 0.2935709  |
| H  | -1.4276533 | 2.4965224  | 1.7275006  |
| H  | -3.9327639 | 0.7008242  | -3.3084020 |
| C  | -5.8696398 | 1.5367675  | -2.8213476 |
| H  | -4.8380428 | -0.2382285 | -2.1217454 |
| H  | -5.6510341 | 2.5671325  | -3.1501371 |
| H  | -6.5743386 | 1.6049504  | -1.9748982 |
| H  | -6.3924998 | 1.0286913  | -3.6474980 |
| C  | 6.5186203  | -1.3697413 | -0.9589192 |
| H  | 6.0172089  | -0.5957299 | 2.3989089  |
| H  | 6.5663973  | 0.4825562  | 1.0895961  |
| C  | 6.5384482  | -0.5673027 | 1.4270102  |
| H  | 5.1931505  | -2.9490097 | 1.8486160  |
| H  | 6.7486225  | -3.3173738 | 1.0418106  |
| H  | 5.2053006  | -3.5280850 | 0.1643165  |
| H  | 7.5776108  | -0.9082011 | 1.5825138  |
| C  | 5.7673119  | -1.4271388 | 0.3946628  |
| Li | 3.1129464  | -0.0330698 | 0.4762278  |
| H  | 6.5267658  | -0.3323746 | -1.3332431 |
| O  | 4.4832213  | -0.9558999 | 0.2412657  |
| H  | 5.9962966  | -1.9911221 | -1.7061878 |
| H  | 7.5624848  | -1.7229631 | -0.8867083 |
| C  | 5.7394435  | -2.8939974 | 0.8922760  |
| C  | -4.2923769 | -3.1127402 | 1.8639719  |
| H  | -4.5114283 | 0.3631359  | 1.8960764  |
| H  | -3.3594407 | -0.6668102 | 2.7890275  |
| C  | -4.3574851 | -0.6412153 | 2.3229863  |
| H  | -5.9791757 | -0.6439596 | 0.0761873  |

|    |            |            |            |
|----|------------|------------|------------|
| H  | -6.6654423 | -1.7956917 | 1.2512284  |
| H  | -5.9147073 | -2.3936944 | -0.2555227 |
| H  | -5.1122600 | -0.7881462 | 3.1124708  |
| C  | -4.4662764 | -1.7203619 | 1.2297113  |
| Li | -2.0342291 | -2.1771586 | -0.5177336 |
| H  | -3.3102355 | -3.1879472 | 2.3592700  |
| O  | -3.4357118 | -1.5487585 | 0.2778921  |
| H  | -4.3530961 | -3.8965043 | 1.0902304  |
| H  | -5.0709378 | -3.3198090 | 2.6162960  |
| C  | -5.8396474 | -1.6338231 | 0.5389844  |

**P<sub>1f-A</sub>**

-----

|   |            |            |            |
|---|------------|------------|------------|
| H | -3.5314932 | 2.4932814  | -1.6180822 |
| O | 1.9362369  | 1.3123982  | 1.0022335  |
| H | 2.5937118  | -0.7338082 | -3.3207023 |
| C | 1.4976954  | 3.9250668  | 1.1619980  |
| C | 0.2399935  | -0.4160958 | -0.6380951 |
| C | 2.0090203  | -1.6115582 | -3.0037066 |
| C | -0.1908190 | 0.8441825  | -0.0374239 |
| H | -4.4967561 | 1.6179196  | -0.4355928 |
| O | -0.5222234 | -1.3352635 | -0.9836498 |
| C | -2.5742427 | 0.6615409  | -0.8891632 |
| O | 1.5621281  | -0.5760693 | -0.8187660 |
| H | -3.1377007 | -0.5584938 | -0.0970281 |
| H | 2.4563935  | -2.5007343 | -3.4772152 |
| H | 1.9771857  | 3.4387398  | 2.0235727  |
| C | 2.5305910  | 4.4050940  | 0.1566862  |
| H | 0.9777256  | -1.5084632 | -3.3762235 |
| C | -2.0435988 | 2.3654532  | 0.8320631  |
| H | 0.8731027  | 4.7576750  | 1.5188608  |
| C | -4.5927745 | 0.7940608  | -2.4264145 |
| C | 0.8557689  | 1.6989631  | 0.5589953  |
| H | -2.1671579 | 0.1018666  | -1.7429830 |



|    |            |            |            |
|----|------------|------------|------------|
| H  | 3.1766478  | 5.1660799  | 0.6236765  |
| H  | 3.0893496  | -1.8538407 | -1.1116145 |
| C  | -1.5588988 | 1.2570752  | -0.0756899 |
| H  | 3.1700734  | 3.5752401  | -0.1785922 |
| O  | 0.5604883  | 3.0061578  | 0.5616892  |
| C  | -3.8148340 | 1.4737923  | -1.2931592 |
| H  | 1.4598060  | -2.6350615 | -1.1588616 |
| H  | 2.0452449  | 4.8580335  | -0.7220769 |
| C  | 2.0580627  | -1.7782886 | -1.4974878 |
| H  | -3.0767315 | 2.1558084  | 1.1413532  |
| H  | -2.0566644 | 3.3271513  | 0.2935709  |
| H  | -1.4276533 | 2.4965224  | 1.7275006  |
| H  | -3.9327639 | 0.7008242  | -3.3084020 |
| C  | -5.8696398 | 1.5367675  | -2.8213476 |
| H  | -4.8380428 | -0.2382285 | -2.1217454 |
| H  | -5.6510341 | 2.5671325  | -3.1501371 |
| H  | -6.5743386 | 1.6049504  | -1.9748982 |
| H  | -6.3924998 | 1.0286913  | -3.6474980 |
| C  | 6.8120433  | -0.7020603 | -0.4023497 |
| H  | 6.1279678  | 0.0704669  | 2.9234250  |
| H  | 6.6220970  | 1.1756130  | 1.6145714  |
| C  | 6.6775206  | 0.1324174  | 1.9688356  |
| H  | 5.5391433  | -2.3554572 | 2.3867765  |
| H  | 7.1482664  | -2.5923497 | 1.6379585  |
| H  | 5.6612707  | -2.9547214 | 0.7139608  |
| H  | 7.7372789  | -0.1104568 | 2.1642276  |
| C  | 6.0230288  | -0.8083750 | 0.9265969  |
| Li | 3.1129464  | -0.0330698 | 0.4762278  |
| H  | 6.7393021  | 0.3263770  | -0.7939350 |
| O  | 4.7076448  | -0.4579298 | 0.7230261  |
| H  | 6.3738938  | -1.3787882 | -1.1556168 |
| H  | 7.8804498  | -0.9579528 | -0.2898274 |
| C  | 6.1106986  | -2.2645391 | 1.4481026  |
| C  | -4.2923769 | -3.1127402 | 1.8639719  |

|    |            |            |            |
|----|------------|------------|------------|
| H  | -4.5114283 | 0.3631359  | 1.8960764  |
| H  | -3.3594407 | -0.6668102 | 2.7890275  |
| C  | -4.3574851 | -0.6412153 | 2.3229863  |
| H  | -5.9791757 | -0.6439596 | 0.0761873  |
| H  | -6.6654423 | -1.7956917 | 1.2512284  |
| H  | -5.9147073 | -2.3936944 | -0.2555227 |
| H  | -5.1122600 | -0.7881462 | 3.1124708  |
| C  | -4.4662764 | -1.7203619 | 1.2297113  |
| Li | -2.0342291 | -2.1771586 | -0.5177336 |
| H  | -3.3102355 | -3.1879472 | 2.3592700  |
| O  | -3.4357118 | -1.5487585 | 0.2778921  |
| H  | -4.3530961 | -3.8965043 | 1.0902304  |
| H  | -5.0709378 | -3.3198090 | 2.6162960  |
| C  | -5.8396474 | -1.6338231 | 0.5389844  |

## 2f'

-----

|   |           |           |            |
|---|-----------|-----------|------------|
| O | 5.5800600 | 2.8903350 | 5.1857480  |
| H | 7.4856600 | 2.4775480 | -0.6609840 |
| C | 7.0640490 | 5.1117720 | 5.6055740  |
| C | 6.2372500 | 2.5697790 | 2.1029810  |
| C | 6.8604710 | 1.5943690 | -0.8613360 |
| C | 5.1972560 | 3.3944590 | 2.8588630  |
| O | 7.4332690 | 2.6750200 | 2.2344890  |
| C | 4.6777880 | 5.8395810 | 2.6749280  |
| O | 5.6407940 | 1.7128880 | 1.2597940  |
| H | 7.4342620 | 0.9101740 | -1.5074820 |
| H | 6.4368200 | 4.7544660 | 6.4361250  |
| C | 8.4478730 | 4.4857770 | 5.6519330  |
| H | 5.9608660 | 1.9148270 | -1.4099660 |
| C | 4.4054870 | 4.3478660 | 0.6422260  |
| H | 7.1181530 | 6.2098580 | 5.6398220  |
| C | 5.7348080 | 3.6633570 | 4.2716470  |
| H | 8.9671300 | 4.7911810 | 6.5751640  |

|   |           |            |           |
|---|-----------|------------|-----------|
| H | 7.3837530 | 0.6115070  | 1.0057790 |
| C | 4.7580790 | 4.6373550  | 2.0790830 |
| H | 8.3798710 | 3.3879900  | 5.6410080 |
| O | 6.4016530 | 4.8186300  | 4.3598190 |
| C | 4.2315900 | 7.1457040  | 2.0794220 |
| H | 5.8898920 | -0.0134550 | 0.2375840 |
| H | 9.0512640 | 4.8052380  | 4.7883320 |
| C | 6.4870510 | 0.8895120  | 0.4319690 |
| H | 4.3272980 | 2.7379520  | 3.0037190 |
| H | 4.0236130 | 5.2276200  | 0.1077270 |
| H | 3.6349770 | 3.5580680  | 0.5833570 |
| H | 5.2839480 | 3.9681900  | 0.0905700 |
| C | 2.5354080 | 9.0644680  | 2.1875280 |
| C | 2.9572060 | 7.7026910  | 2.7414400 |
| H | 4.9301250 | 5.8902760  | 3.7409490 |
| H | 3.3248880 | 9.8208460  | 2.3365760 |
| H | 1.6222880 | 9.4354390  | 2.6806110 |
| H | 2.3304350 | 9.0125620  | 1.1045660 |
| H | 2.1390940 | 6.9724050  | 2.6113400 |
| H | 3.1197740 | 7.7782610  | 3.8319520 |
| H | 4.0704640 | 7.0603040  | 0.9924020 |
| H | 5.0423290 | 7.8889680  | 2.2084030 |

**R<sub>1f-B</sub>**

-----

|   |            |            |            |
|---|------------|------------|------------|
| H | -2.4925865 | -0.9955323 | 2.2025965  |
| O | 1.8485633  | 0.0410669  | 1.8274544  |
| H | 1.3590237  | -2.3067874 | -2.3734453 |
| C | 0.5843512  | -0.9095092 | 3.9512431  |
| C | 0.4575899  | 0.1052795  | -0.7708405 |
| C | 2.3905798  | -1.9359169 | -2.2673129 |
| C | -0.1559523 | 0.3733320  | 0.5335400  |
| H | -3.7937836 | -0.1916120 | 1.3184206  |
| O | -0.1855565 | -0.0321789 | -1.8250005 |

|   |            |            |            |
|---|------------|------------|------------|
| C | -2.1825058 | 1.1335153  | 1.9224519  |
| O | 1.7864576  | -0.0478336 | -0.8034714 |
| H | -2.8043576 | 2.0415674  | 1.8825021  |
| H | 2.9396897  | -2.1864062 | -3.1896965 |
| H | 1.5396186  | -1.3832386 | 3.6846540  |
| C | 0.7992278  | 0.2692659  | 4.8859351  |
| H | 2.8816634  | -2.4634508 | -1.4353323 |
| C | -2.0734666 | 1.6530413  | -0.4959084 |
| H | -0.0769922 | -1.6628247 | 4.4030976  |
| C | -3.9088286 | 0.0442736  | 3.4692908  |
| C | 0.6256921  | -0.0299811 | 1.7258401  |
| H | -1.5052356 | 1.2476930  | 2.7777220  |
| H | 1.2729893  | -0.0817264 | 5.8169007  |
| H | 1.9750048  | 0.1222140  | -2.8740068 |
| C | -1.4151601 | 1.0320771  | 0.6132723  |
| H | 1.4624199  | 1.0200396  | 4.4309773  |
| O | -0.1003091 | -0.5265316 | 2.7367235  |
| C | -3.1035563 | -0.0795642 | 2.1717633  |
| H | 3.4818768  | -0.1002554 | -1.8741891 |
| H | -0.1560373 | 0.7495675  | 5.1511409  |
| C | 2.4479399  | -0.4356558 | -2.0547453 |
| H | -2.7672299 | 2.4499636  | -0.1998340 |
| H | -2.7444728 | 0.9638367  | -1.0295259 |
| H | -1.4412902 | 1.9523087  | -1.3410457 |
| H | -3.2113986 | 0.1584045  | 4.3197833  |
| C | -4.8336986 | -1.1483218 | 3.7216954  |
| H | -4.5043518 | 0.9755074  | 3.4442895  |
| H | -4.2640884 | -2.0909018 | 3.7867343  |
| H | -5.5688291 | -1.2644328 | 2.9074892  |
| H | -5.3953402 | -1.0327052 | 4.6627982  |
| C | 6.5870979  | 1.6399305  | -0.7394941 |
| H | 6.4322651  | -0.9360065 | 1.5982101  |
| H | 6.4201040  | 0.8225291  | 1.8926921  |
| C | 6.7597549  | 0.0374147  | 1.1955285  |

|    |            |            |            |
|----|------------|------------|------------|
| H  | 6.2728479  | -1.8272001 | -0.7991749 |
| H  | 7.7241936  | -0.8769449 | -1.2419522 |
| H  | 6.2083513  | -0.6860560 | -2.1675741 |
| H  | 7.8640794  | 0.0503415  | 1.1742166  |
| C  | 6.1231689  | 0.2645900  | -0.1983380 |
| Li | 3.2354300  | 0.2931106  | 0.5926655  |
| H  | 6.2411963  | 2.4404527  | -0.0642741 |
| O  | 4.7505160  | 0.2278084  | -0.1102759 |
| H  | 6.1392340  | 1.8221979  | -1.7309672 |
| H  | 7.6848168  | 1.7169146  | -0.8354227 |
| C  | 6.6236034  | -0.8448583 | -1.1573720 |
| C  | -5.1111782 | -0.9061862 | -3.4470872 |
| H  | -5.4381508 | 0.5829580  | -0.3158573 |
| H  | -5.4206995 | -1.1565569 | -0.7081936 |
| C  | -5.6484625 | -0.1549986 | -1.1065580 |
| H  | -4.8419598 | 2.3014811  | -2.1086133 |
| H  | -6.1279248 | 1.6731452  | -3.1701136 |
| H  | -4.4447715 | 1.7607379  | -3.7598742 |
| H  | -6.7259995 | -0.1082814 | -1.3343236 |
| C  | -4.7912508 | 0.1271293  | -2.3534385 |
| Li | -1.8027565 | -0.4065481 | -2.5017025 |
| H  | -4.8902464 | -1.9241950 | -3.0868470 |
| O  | -3.4198401 | -0.0002093 | -2.0289654 |
| H  | -4.5015249 | -0.7168819 | -4.3468417 |
| H  | -6.1721180 | -0.8697418 | -3.7441293 |
| C  | -5.0719947 | 1.5477702  | -2.8788990 |

**TS<sub>1f-B</sub>**

-----

|   |            |            |            |
|---|------------|------------|------------|
| H | -2.4925865 | -0.9955323 | 2.2025965  |
| O | 1.8485633  | 0.0410669  | 1.8274544  |
| H | 1.3590237  | -2.3067874 | -2.3734453 |
| C | 0.5843512  | -0.9095092 | 3.9512431  |
| C | 0.4575899  | 0.1052795  | -0.7708405 |

|   |            |            |            |
|---|------------|------------|------------|
| C | 2.3905798  | -1.9359169 | -2.2673129 |
| C | -0.1559523 | 0.3733320  | 0.5335400  |
| H | -3.7937836 | -0.1916120 | 1.3184206  |
| O | -0.1855565 | -0.0321789 | -1.8250005 |
| C | -2.1825058 | 1.1335153  | 1.9224519  |
| O | 1.7864576  | -0.0478336 | -0.8034714 |
| H | -2.8043576 | 2.0415674  | 1.8825021  |
| H | 2.9396897  | -2.1864062 | -3.1896965 |
| H | 1.5396186  | -1.3832386 | 3.6846540  |
| C | 0.7992278  | 0.2692659  | 4.8859351  |
| H | 2.8816634  | -2.4634508 | -1.4353323 |
| C | -2.0734666 | 1.6530413  | -0.4959084 |
| H | -0.0769922 | -1.6628247 | 4.4030976  |
| C | -3.9088286 | 0.0442736  | 3.4692908  |
| C | 0.6256921  | -0.0299811 | 1.7258401  |
| H | -1.5052356 | 1.2476930  | 2.7777220  |
| H | 1.2729893  | -0.0817264 | 5.8169007  |
| H | 1.9750048  | 0.1222140  | -2.8740068 |
| C | -1.4151601 | 1.0320771  | 0.6132723  |
| H | 1.4624199  | 1.0200396  | 4.4309773  |
| O | -0.1003091 | -0.5265316 | 2.7367235  |
| C | -3.1035563 | -0.0795642 | 2.1717633  |
| H | 3.4818768  | -0.1002554 | -1.8741891 |
| H | -0.1560373 | 0.7495675  | 5.1511409  |
| C | 2.4479399  | -0.4356558 | -2.0547453 |
| H | -2.7672299 | 2.4499636  | -0.1998340 |
| H | -2.8980309 | 0.8061140  | -1.1516429 |
| H | -1.4412902 | 1.9523087  | -1.3410457 |
| H | -3.2113986 | 0.1584045  | 4.3197833  |
| C | -4.8336986 | -1.1483218 | 3.7216954  |
| H | -4.5043518 | 0.9755074  | 3.4442895  |
| H | -4.2640884 | -2.0909018 | 3.7867343  |
| H | -5.5688291 | -1.2644328 | 2.9074892  |
| H | -5.3953402 | -1.0327052 | 4.6627982  |

|    |            |            |            |
|----|------------|------------|------------|
| C  | 6.5870979  | 1.6399305  | -0.7394941 |
| H  | 6.4322651  | -0.9360065 | 1.5982101  |
| H  | 6.4201040  | 0.8225291  | 1.8926921  |
| C  | 6.7597549  | 0.0374147  | 1.1955285  |
| H  | 6.2728479  | -1.8272001 | -0.7991749 |
| H  | 7.7241936  | -0.8769449 | -1.2419522 |
| H  | 6.2083513  | -0.6860560 | -2.1675741 |
| H  | 7.8640794  | 0.0503415  | 1.1742166  |
| C  | 6.1231689  | 0.2645900  | -0.1983380 |
| Li | 3.2354300  | 0.2931106  | 0.5926655  |
| H  | 6.2411963  | 2.4404527  | -0.0642741 |
| O  | 4.7505160  | 0.2278084  | -0.1102759 |
| H  | 6.1392340  | 1.8221979  | -1.7309672 |
| H  | 7.6848168  | 1.7169146  | -0.8354227 |
| C  | 6.6236034  | -0.8448583 | -1.1573720 |
| C  | -5.1111782 | -0.9061862 | -3.4470872 |
| H  | -5.4381508 | 0.5829580  | -0.3158573 |
| H  | -5.4206995 | -1.1565569 | -0.7081936 |
| C  | -5.6484625 | -0.1549986 | -1.1065580 |
| H  | -4.8419598 | 2.3014811  | -2.1086133 |
| H  | -6.1279248 | 1.6731452  | -3.1701136 |
| H  | -4.4447715 | 1.7607379  | -3.7598742 |
| H  | -6.7259995 | -0.1082814 | -1.3343236 |
| C  | -4.7912508 | 0.1271293  | -2.3534385 |
| Li | -1.8027565 | -0.4065481 | -2.5017025 |
| H  | -4.8902464 | -1.9241950 | -3.0868470 |
| O  | -3.4198401 | -0.0002093 | -2.0289654 |
| H  | -4.5015249 | -0.7168819 | -4.3468417 |
| H  | -6.1721180 | -0.8697418 | -3.7441293 |
| C  | -5.0719947 | 1.5477702  | -2.8788990 |

**P<sub>1f-B</sub>**

-----  
H -2.1131709 -1.3444615 1.5737156

|   |            |            |            |
|---|------------|------------|------------|
| O | 1.9964959  | 0.4506585  | 2.3390752  |
| H | 0.1324085  | -2.1509147 | -1.7109091 |
| C | 1.2315042  | 1.4556288  | 4.6751088  |
| C | 0.1014870  | 0.3390967  | 0.0367404  |
| C | 1.2266961  | -2.0448223 | -1.7688424 |
| C | -0.1680894 | 0.8089617  | 1.3500833  |
| H | -3.6016314 | -0.5158116 | 1.0903160  |
| O | -0.7488284 | 0.3222290  | -0.8974023 |
| C | -2.4316058 | 0.5522546  | 2.5810488  |
| O | 1.3404446  | -0.1340111 | -0.2228901 |
| H | -3.2817324 | 1.1763280  | 2.9084220  |
| H | 1.5548211  | -2.3838199 | -2.7654341 |
| H | 1.9025614  | 0.5842337  | 4.6924032  |
| C | 2.0281133  | 2.7504133  | 4.6373588  |
| H | 1.6932614  | -2.7062435 | -1.0217616 |
| C | -2.0048066 | 2.4756948  | 1.0586975  |
| H | 0.5780084  | 1.4206032  | 5.5606080  |
| C | -3.7682286 | -1.6084325 | 2.9480183  |
| C | 0.8192062  | 0.8269386  | 2.3958743  |
| H | -1.8462843 | 0.3111189  | 3.4818272  |
| H | 2.6414387  | 2.8422343  | 5.5488440  |
| H | 1.1956228  | 0.0692720  | -2.2900405 |
| C | -1.5393426 | 1.3456567  | 1.6411737  |
| H | 2.7026723  | 2.7678812  | 3.7683097  |
| O | 0.3365030  | 1.3448876  | 3.5589234  |
| C | -2.9617146 | -0.7544543 | 1.9634611  |
| H | 2.7619754  | -0.5094474 | -1.5814120 |
| H | 1.3577115  | 3.6231735  | 4.5832957  |
| C | 1.6645747  | -0.6062920 | -1.5613144 |
| H | -3.0016879 | 2.8671074  | 1.2946032  |
| H | -4.7640457 | 1.6349813  | -1.2445570 |
| H | -1.3608697 | 3.0920926  | 0.4206946  |
| H | -3.1280546 | -1.8541239 | 3.8143828  |
| C | -4.3150490 | -2.8977798 | 2.3328723  |



|    |            |            |            |
|----|------------|------------|------------|
| H  | -4.6033718 | -1.0077739 | 3.3537257  |
| H  | -3.5008795 | -3.5385884 | 1.9543955  |
| H  | -4.9885394 | -2.6847844 | 1.4845310  |
| H  | -4.8867711 | -3.4862391 | 3.0684314  |
| C  | 6.6809467  | 0.1975236  | -0.3831399 |
| H  | 6.1650138  | -1.7940620 | 2.4276186  |
| H  | 6.6308113  | -0.0754950 | 2.3668555  |
| C  | 6.6751943  | -1.0304326 | 1.8161465  |
| H  | 5.4783957  | -3.0034218 | 0.2765486  |
| H  | 7.0600173  | -2.5846998 | -0.4528946 |
| H  | 5.5386116  | -2.1451660 | -1.2831126 |
| H  | 7.7362741  | -1.3210484 | 1.7120620  |
| C  | 5.9467653  | -0.8804892 | 0.4555521  |
| Li | 3.0314192  | -0.0750190 | 0.8820333  |
| H  | 6.6366749  | 1.1664792  | 0.1419804  |
| O  | 4.6374666  | -0.5187478 | 0.6470872  |
| H  | 6.1726064  | 0.3210718  | -1.3543367 |
| H  | 7.7413503  | -0.0479190 | -0.5743113 |
| C  | 6.0238699  | -2.2347305 | -0.2960273 |
| C  | -3.4235241 | -0.6013783 | -3.1652168 |
| H  | -6.5842054 | 0.1420770  | -1.8794507 |
| H  | -5.4870052 | -1.1941353 | -1.4246790 |
| C  | -5.7761106 | -0.5160557 | -2.2420763 |
| H  | -5.7587906 | 1.9774963  | -3.4721769 |
| H  | -5.3504716 | 0.7635692  | -4.7043228 |
| H  | -4.0978246 | 1.8962016  | -4.1272443 |
| H  | -6.1875433 | -1.1213588 | -3.0643541 |
| C  | -4.5734551 | 0.3008958  | -2.7214141 |
| Li | -2.3564511 | 1.0603007  | -0.7743211 |
| H  | -3.1248362 | -1.2883755 | -2.3586395 |
| O  | -4.0583237 | 1.0635126  | -1.5806358 |
| H  | -2.5421990 | -0.0091941 | -3.4583453 |
| H  | -3.7297162 | -1.2060564 | -4.0318484 |
| C  | -4.9656531 | 1.2933948  | -3.8191681 |

2f

---

|   |           |           |            |
|---|-----------|-----------|------------|
| O | 6.7767700 | 2.2136100 | 4.5564100  |
| H | 8.0677000 | 2.9409000 | -0.8785000 |
| C | 6.0529800 | 3.9650900 | 6.5156100  |
| C | 6.6985300 | 3.0100200 | 1.7964300  |
| C | 7.3269400 | 2.2011300 | -1.1950100 |
| C | 5.6554900 | 3.5100200 | 2.8144800  |
| O | 7.8992800 | 3.1656600 | 1.8362000  |
| C | 4.7481500 | 5.3654300 | 1.1472800  |
| O | 6.0255500 | 2.2774900 | 0.8508100  |
| H | 7.7930900 | 1.5254100 | -1.9176900 |
| H | 5.8458000 | 2.9047400 | 6.6937800  |
| C | 7.3800300 | 4.3873500 | 7.1013500  |
| H | 6.5173100 | 2.7466000 | -1.6899200 |
| C | 4.3849442 | 5.4404725 | 3.4757966  |
| H | 5.2445000 | 4.5292800 | 6.9976700  |
| C | 6.2514400 | 3.2778300 | 4.2269800  |
| H | 7.3897300 | 4.2351700 | 8.1842300  |
| H | 7.5896300 | 0.9102400 | 0.5408600  |
| C | 4.9795500 | 4.8459500 | 2.5495200  |
| H | 8.1956800 | 3.8119900 | 6.6550500  |
| O | 6.0129800 | 4.2794900 | 5.1157100  |
| H | 6.0971300 | 0.6598100 | -0.3621400 |
| H | 7.5747500 | 5.4442500 | 6.8916300  |
| C | 6.7946500 | 1.4275100 | -0.0090700 |
| H | 4.8222200 | 2.8041600 | 2.7621000  |
| C | 4.7022000 | 6.8649600 | 1.2396200  |
| C | 5.3560500 | 7.4839700 | 0.0594000  |
| H | 5.2984000 | 7.2092300 | 2.0949400  |
| H | 3.6762400 | 7.2437300 | 1.3761700  |
| H | 4.2859142 | 6.5215225 | 3.5208866  |
| H | 4.0585342 | 4.9321825 | 4.3672566  |
| H | 3.7685300 | 5.0267400 | 0.7730500  |

|   |           |           |            |
|---|-----------|-----------|------------|
| H | 5.4763100 | 5.0350400 | 0.3979600  |
| H | 6.3613700 | 7.0633700 | -0.0561900 |
| C | 5.4376100 | 8.9308100 | 0.4425600  |
| H | 4.7595900 | 7.3181700 | -0.8395600 |
| H | 5.9997200 | 9.0338100 | 1.3823300  |
| H | 4.4234000 | 9.3085700 | 0.6166000  |
| H | 5.9399500 | 9.4636500 | -0.3526700 |

**Figure 2 (b)**

**1g**

-----

|   |           |           |            |
|---|-----------|-----------|------------|
| O | 7.8730150 | 3.3466650 | 4.1955010  |
| H | 6.8626130 | 2.0707950 | -1.1646670 |
| C | 6.1086030 | 2.8604780 | 6.1546570  |
| C | 7.0199440 | 3.5761870 | 1.5335910  |
| C | 7.0888810 | 1.1581750 | -0.5931100 |
| C | 6.2422050 | 4.1826370 | 2.6723340  |
| O | 7.6130850 | 4.1863100 | 0.6746380  |
| C | 4.1869470 | 5.4785520 | 3.5074330  |
| O | 6.9926970 | 2.2342090 | 1.6073910  |
| H | 4.6037810 | 5.2138730 | 4.4956630  |
| H | 7.7171560 | 0.5079470 | -1.2236020 |
| H | 6.8800860 | 2.0950890 | 5.9834910  |
| C | 6.6032490 | 3.9145130 | 7.1324340  |
| H | 6.1459240 | 0.6279770 | -0.3853820 |
| C | 5.2946340 | 6.0842350 | 1.3239930  |
| H | 5.1928140 | 2.3738000 | 6.5213280  |
| C | 6.7146630 | 3.6263150 | 3.9848300  |
| C | 2.9054870 | 4.6419710 | 3.3553580  |
| H | 6.8252480 | 3.4455980 | 8.1050570  |
| H | 8.7356070 | 2.0690360 | 0.4933670  |
| C | 5.3201770 | 5.1679230 | 2.5233970  |
| H | 7.5261430 | 4.3862090 | 6.7637240  |
| O | 5.7314030 | 3.4283370 | 4.8850290  |

|   |           |           |           |
|---|-----------|-----------|-----------|
| C | 3.8858840 | 6.9919020 | 3.5486710 |
| H | 8.0916580 | 0.5770370 | 1.2473610 |
| H | 5.8430260 | 4.6948270 | 7.2966340 |
| C | 7.8222600 | 1.4900910 | 0.6958650 |
| H | 4.2522320 | 6.2138190 | 0.9874490 |
| H | 5.9001650 | 5.7385400 | 0.4809620 |
| H | 5.6581660 | 7.0873050 | 1.6103790 |
| H | 2.2887600 | 4.7527740 | 4.2623100 |
| H | 3.1342290 | 3.5708660 | 3.2344650 |
| H | 2.2918540 | 4.9663780 | 2.5047290 |
| H | 3.1725420 | 7.2138240 | 4.3593900 |
| H | 3.4522930 | 7.3202490 | 2.5935730 |
| H | 4.7985470 | 7.5808370 | 3.7360120 |

**R<sub>1g-A</sub>**

-----

|   |            |           |           |
|---|------------|-----------|-----------|
| O | 7.5386401  | 3.3620219 | 5.5172279 |
| H | 8.8652752  | 2.2886139 | 0.8389591 |
| C | 5.1192436  | 2.2073939 | 5.7491081 |
| C | 7.9550890  | 4.4781010 | 2.7131623 |
| C | 9.6966885  | 2.0989273 | 1.5350023 |
| C | 6.8675841  | 4.7850854 | 3.6910110 |
| O | 7.9390147  | 4.8432418 | 1.5465053 |
| C | 6.3683571  | 7.0511043 | 2.6253977 |
| O | 8.9460014  | 3.7451934 | 3.2134533 |
| H | 5.8134509  | 6.8675523 | 1.8139859 |
| H | 10.5746321 | 1.7951626 | 0.9422144 |
| H | 5.9991382  | 1.5592003 | 5.8654493 |
| C | 4.6842943  | 2.7964996 | 7.0790164 |
| H | 9.4376201  | 1.2585588 | 2.1969366 |
| C | 5.0928668  | 6.2534734 | 4.6873249 |
| H | 4.3086137  | 1.6375660 | 5.2743299 |
| C | 6.6606889  | 3.7437900 | 4.7580942 |
| C | 7.8234643  | 7.1611114 | 2.1382270 |

|    |            |            |            |
|----|------------|------------|------------|
| H  | 4.4090096  | 1.9801629  | 7.7656930  |
| H  | 10.3430742 | 4.1827981  | 1.7243626  |
| C  | 6.1490881  | 5.9508528  | 3.6574104  |
| H  | 5.4988309  | 3.3691349  | 7.5474337  |
| O  | 5.4333312  | 3.2411298  | 4.7757373  |
| C  | 5.8760854  | 8.3999641  | 3.1967884  |
| H  | 10.8403744 | 3.0902850  | 3.0964444  |
| H  | 3.8056548  | 3.4498325  | 6.9603988  |
| C  | 10.0652695 | 3.3223450  | 2.3485551  |
| H  | 5.2583515  | 7.2620897  | 5.1005580  |
| H  | 5.0564894  | 5.5382032  | 5.5130908  |
| H  | 4.1007712  | 6.2784059  | 4.2083378  |
| H  | 7.8609075  | 7.8759665  | 1.3024267  |
| H  | 8.2042760  | 6.1974324  | 1.7626255  |
| H  | 8.5113282  | 7.5258029  | 2.9173741  |
| H  | 5.9640734  | 9.1713979  | 2.4170549  |
| H  | 6.4692694  | 8.7186445  | 4.0701962  |
| H  | 4.8201698  | 8.3432825  | 3.5017408  |
| C  | 12.7491821 | 2.6744275  | 7.0949581  |
| H  | 9.9160060  | 0.7183767  | 7.6162809  |
| H  | 10.3437162 | 2.2688047  | 8.3881014  |
| C  | 10.7597891 | 1.3654838  | 7.9105527  |
| H  | 11.3192618 | -0.1650108 | 5.6727210  |
| H  | 12.7861397 | -0.1011899 | 6.6960154  |
| H  | 12.7522857 | 0.7410504  | 5.1217491  |
| H  | 11.3616533 | 0.8257015  | 8.6627504  |
| C  | 11.5762444 | 1.7647731  | 6.6571119  |
| Li | 9.4128896  | 3.1961363  | 5.1868489  |
| H  | 12.3544235 | 3.5966248  | 7.5528556  |
| O  | 10.7733949 | 2.4302591  | 5.7544035  |
| H  | 13.3476694 | 2.9670371  | 6.2159831  |
| H  | 13.4210954 | 2.1860579  | 7.8224573  |
| C  | 12.1483112 | 0.4807065  | 6.0077726  |
| C  | 3.1468134  | 6.8314131  | -0.1678758 |

|    |           |           |            |
|----|-----------|-----------|------------|
| H  | 6.0265931 | 7.5271456 | -2.0012524 |
| H  | 5.3190872 | 8.4692084 | -0.6649401 |
| C  | 5.0835496 | 7.7663407 | -1.4820595 |
| H  | 5.0660671 | 5.2404009 | -2.5982148 |
| H  | 3.4327135 | 5.9416297 | -2.7990276 |
| H  | 3.6950812 | 4.5789098 | -1.6701724 |
| H  | 4.4147708 | 8.2790240 | -2.1952358 |
| C  | 4.4622581 | 6.4722624 | -0.9011843 |
| Li | 6.5441970 | 4.8522859 | 0.3307100  |
| H  | 3.3573810 | 7.5260139 | 0.6636253  |
| O  | 5.3438784 | 5.8774478 | -0.0275041 |
| H  | 2.6993652 | 5.9193472 | 0.2607104  |
| H  | 2.4026525 | 7.3059991 | -0.8310728 |
| C  | 4.1370163 | 5.5078212 | -2.0676060 |

**TS<sub>1g-A</sub>**

-----

|   |            |            |            |
|---|------------|------------|------------|
| O | -2.2150897 | 0.0579255  | -1.7882790 |
| H | 1.8000777  | 2.5425416  | -1.1875953 |
| C | -4.2036851 | 1.5672176  | -0.8961983 |
| C | 0.2714591  | 0.1337303  | -0.1963428 |
| C | 1.8021970  | 2.0808188  | -2.1872472 |
| C | -1.0782038 | -0.0955977 | 0.3214902  |
| O | 1.2533879  | 0.3972845  | 0.5174524  |
| C | -0.4008314 | -1.5579195 | 2.2952341  |
| O | 0.4161059  | 0.1527818  | -1.5294926 |
| H | 0.2214775  | -0.6591735 | 3.0897744  |
| H | 2.7496313  | 2.3477322  | -2.6836054 |
| H | -3.8136716 | 1.8062119  | -1.8955372 |
| C | -5.3089287 | 0.5274897  | -0.9709868 |
| H | 0.9818776  | 2.5070268  | -2.7851760 |
| C | -2.6810661 | -0.5372495 | 2.2447764  |
| H | -4.5548567 | 2.4919115  | -0.4165669 |
| C | -2.1669169 | 0.3464954  | -0.5957643 |

|    |            |            |            |
|----|------------|------------|------------|
| C  | 0.7109311  | -2.2692380 | 1.5066781  |
| H  | -6.1469931 | 0.9248389  | -1.5662989 |
| H  | 2.5003577  | 0.1128803  | -1.5437598 |
| C  | -1.3310275 | -0.7072285 | 1.5807340  |
| H  | -4.9539430 | -0.3926145 | -1.4583027 |
| O  | -3.1039482 | 1.1371455  | -0.0585147 |
| C  | -1.0053229 | -2.5047552 | 3.3482546  |
| H  | 1.6151113  | 0.1336976  | -3.1336766 |
| H  | -5.6918913 | 0.2767849  | 0.0308724  |
| C  | 1.6879128  | 0.5696549  | -2.1249438 |
| H  | -3.2374963 | -1.4896511 | 2.2465110  |
| H  | -3.2970895 | 0.2376299  | 1.7900231  |
| H  | -2.5248735 | -0.2704103 | 3.3012383  |
| H  | 0.8700541  | -3.2807629 | 1.9099751  |
| H  | 1.6888248  | -1.7628985 | 1.5389761  |
| H  | 0.4538384  | -2.3838267 | 0.4393559  |
| H  | -0.1950963 | -3.0100816 | 3.8958268  |
| H  | -1.6252588 | -3.2963363 | 2.8865505  |
| H  | -1.6276598 | -2.0009990 | 4.1006806  |
| C  | -0.9115903 | -1.4916781 | -6.4751032 |
| H  | 0.7144929  | 1.5545868  | -6.0188755 |
| H  | -1.0262072 | 1.2590928  | -6.2535072 |
| C  | -0.0189250 | 0.8633789  | -6.4678654 |
| H  | 2.3158028  | -0.4080328 | -5.7370442 |
| H  | 1.7387489  | -1.1814358 | -7.2406141 |
| H  | 1.6831137  | -2.0732216 | -5.6892903 |
| H  | 0.1289655  | 0.8646916  | -7.5625395 |
| C  | 0.1341933  | -0.5435420 | -5.8365165 |
| Li | -0.8596617 | -0.4244003 | -3.0154682 |
| H  | -1.9289350 | -1.1227641 | -6.2598198 |
| O  | -0.0495195 | -0.4721956 | -4.4752239 |
| H  | -0.8178922 | -2.4982265 | -6.0340214 |
| H  | -0.8019451 | -1.5813220 | -7.5705794 |
| C  | 1.5506931  | -1.0832358 | -6.1568646 |

|    |            |            |           |
|----|------------|------------|-----------|
| C  | -0.3319338 | 0.5644786  | 5.6849523 |
| H  | 2.7063280  | -1.0971331 | 5.2576220 |
| H  | 1.0884814  | -1.8140967 | 5.4690651 |
| C  | 1.7065666  | -0.9304213 | 5.6908206 |
| H  | 2.9714775  | 1.4172337  | 4.9956668 |
| H  | 2.0639818  | 1.7171684  | 6.4984230 |
| H  | 1.5252259  | 2.4717153  | 4.9745457 |
| H  | 1.8134856  | -0.8574882 | 6.7856203 |
| C  | 1.0724446  | 0.3395432  | 5.0948703 |
| Li | 1.7231820  | 0.7362291  | 2.2032417 |
| H  | -0.9815684 | -0.3029206 | 5.4884825 |
| O  | 0.9918900  | 0.2275237  | 3.6871744 |
| H  | -0.7970674 | 1.4520582  | 5.2268217 |
| H  | -0.2950648 | 0.7155719  | 6.7761250 |
| C  | 1.9595271  | 1.5579071  | 5.4126577 |

**P<sub>1g-A</sub>**

-----

|   |            |            |            |
|---|------------|------------|------------|
| O | -2.2150897 | 0.0579255  | -1.7882790 |
| H | 1.8000777  | 2.5425416  | -1.1875953 |
| C | -4.2036851 | 1.5672176  | -0.8961983 |
| C | 0.2714591  | 0.1337303  | -0.1963428 |
| C | 1.8021970  | 2.0808188  | -2.1872472 |
| C | -1.0782038 | -0.0955977 | 0.3214902  |
| O | 1.2533879  | 0.3972845  | 0.5174524  |
| C | -0.4008314 | -1.5579195 | 2.2952341  |
| O | 0.4161059  | 0.1527818  | -1.5294926 |
| H | 0.2823381  | -0.5511813 | 3.3707018  |
| H | 2.7496313  | 2.3477322  | -2.6836054 |
| H | -3.8136716 | 1.8062119  | -1.8955372 |
| C | -5.3089287 | 0.5274897  | -0.9709868 |
| H | 0.9818776  | 2.5070268  | -2.7851760 |
| C | -2.6810661 | -0.5372495 | 2.2447764  |
| H | -4.5548567 | 2.4919115  | -0.4165669 |



|    |            |            |            |
|----|------------|------------|------------|
| C  | -2.1669169 | 0.3464954  | -0.5957643 |
| C  | 0.7109311  | -2.2692380 | 1.5066781  |
| H  | -6.1469931 | 0.9248389  | -1.5662989 |
| H  | 2.5003577  | 0.1128803  | -1.5437598 |
| C  | -1.3310275 | -0.7072285 | 1.5807340  |
| H  | -4.9539430 | -0.3926145 | -1.4583027 |
| O  | -3.1039482 | 1.1371455  | -0.0585147 |
| C  | -1.0053229 | -2.5047552 | 3.3482546  |
| H  | 1.6151113  | 0.1336976  | -3.1336766 |
| H  | -5.6918913 | 0.2767849  | 0.0308724  |
| C  | 1.6879128  | 0.5696549  | -2.1249438 |
| H  | -3.2374963 | -1.4896511 | 2.2465110  |
| H  | -3.2970895 | 0.2376299  | 1.7900231  |
| H  | -2.5248735 | -0.2704103 | 3.3012383  |
| H  | 0.8700541  | -3.2807629 | 1.9099751  |
| H  | 1.6888248  | -1.7628985 | 1.5389761  |
| H  | 0.4538384  | -2.3838267 | 0.4393559  |
| H  | -0.1950963 | -3.0100816 | 3.8958268  |
| H  | -1.6252588 | -3.2963363 | 2.8865505  |
| H  | -1.6276598 | -2.0009990 | 4.1006806  |
| C  | -0.9115903 | -1.4916781 | -6.4751032 |
| H  | 0.7144929  | 1.5545868  | -6.0188755 |
| H  | -1.0262072 | 1.2590928  | -6.2535072 |
| C  | -0.0189250 | 0.8633789  | -6.4678654 |
| H  | 2.3158028  | -0.4080328 | -5.7370442 |
| H  | 1.7387489  | -1.1814358 | -7.2406141 |
| H  | 1.6831137  | -2.0732216 | -5.6892903 |
| H  | 0.1289655  | 0.8646916  | -7.5625395 |
| C  | 0.1341933  | -0.5435420 | -5.8365165 |
| Li | -0.8596617 | -0.4244003 | -3.0154682 |
| H  | -1.9289350 | -1.1227641 | -6.2598198 |
| O  | -0.0495195 | -0.4721956 | -4.4752239 |
| H  | -0.8178922 | -2.4982265 | -6.0340214 |
| H  | -0.8019451 | -1.5813220 | -7.5705794 |

|    |            |            |            |
|----|------------|------------|------------|
| C  | 1.5506931  | -1.0832358 | -6.1568646 |
| C  | -0.3319338 | 0.5644786  | 5.6849523  |
| H  | 2.7063280  | -1.0971331 | 5.2576220  |
| H  | 1.0884814  | -1.8140967 | 5.4690651  |
| C  | 1.7065666  | -0.9304213 | 5.6908206  |
| H  | 2.9714775  | 1.4172337  | 4.9956668  |
| H  | 2.0639818  | 1.7171684  | 6.4984230  |
| H  | 1.5252259  | 2.4717153  | 4.9745457  |
| H  | 1.8134856  | -0.8574882 | 6.7856203  |
| C  | 1.0724446  | 0.3395432  | 5.0948703  |
| Li | 1.7231820  | 0.7362291  | 2.2032417  |
| H  | -0.9815684 | -0.3029206 | 5.4884825  |
| O  | 0.9918900  | 0.2275237  | 3.6871744  |
| H  | -0.7970674 | 1.4520582  | 5.2268217  |
| H  | -0.2950648 | 0.7155719  | 6.7761250  |
| C  | 1.9595271  | 1.5579071  | 5.4126577  |

## 2g

-----

|   |           |            |            |
|---|-----------|------------|------------|
| O | 7.0634960 | 2.5428040  | 4.0062660  |
| H | 7.0732760 | -0.0837380 | -0.1176870 |
| C | 6.2034220 | 4.1266450  | 6.0221090  |
| C | 7.0149310 | 3.3861670  | 1.3287710  |
| C | 7.9725070 | -0.0022120 | 0.5112090  |
| C | 5.9594730 | 3.8994430  | 2.3140480  |
| O | 7.5286240 | 4.0233730  | 0.4448390  |
| C | 4.6014700 | 5.9217680  | 1.6703320  |
| O | 7.2809590 | 2.0917910  | 1.5803050  |
| H | 8.8087850 | -0.4805740 | -0.0243960 |
| H | 7.0553560 | 4.7703610  | 6.2876230  |
| C | 5.0182320 | 4.3862590  | 6.9370380  |
| H | 7.8033750 | -0.5560810 | 1.4482920  |
| C | 6.8573290 | 6.2382390  | 2.7847390  |
| H | 6.5199190 | 3.0741010  | 6.0657540  |

|   |           |           |            |
|---|-----------|-----------|------------|
| C | 6.3681130 | 3.4897310 | 3.7325360  |
| H | 5.2835340 | 4.1290030 | 7.9754150  |
| H | 8.4324990 | 2.0174320 | -0.1448440 |
| C | 5.7271270 | 5.4059680 | 2.2177440  |
| H | 4.7295340 | 5.4480340 | 6.9127850  |
| O | 5.8667080 | 4.3473440 | 4.6376610  |
| C | 4.3262290 | 7.4063510 | 1.5878590  |
| H | 9.2196320 | 1.5477800 | 1.3946550  |
| H | 4.1509780 | 3.7752060 | 6.6412530  |
| C | 8.3044450 | 1.4543080 | 0.7914660  |
| H | 5.0356580 | 3.3493060 | 2.1004800  |
| H | 6.8595600 | 7.2678970 | 2.4070540  |
| H | 7.8266020 | 5.7886630 | 2.5268680  |
| H | 6.8087520 | 6.2881840 | 3.8878890  |
| C | 3.4782540 | 5.1091420 | 1.0663200  |
| H | 3.2722470 | 5.4569930 | 0.0383340  |
| H | 2.5419870 | 5.2575580 | 1.6343610  |
| H | 3.6670600 | 4.0297970 | 1.0125910  |
| H | 5.0711870 | 8.0294010 | 2.0963970  |
| H | 3.3409770 | 7.6344940 | 2.0327910  |
| H | 4.2697400 | 7.7338410 | 0.5336980  |

**R<sub>1g-B</sub>**

-----

|   |            |            |            |
|---|------------|------------|------------|
| O | -0.7656275 | -1.7955429 | -1.5145818 |
| H | 3.1927305  | -1.1724042 | 1.5354294  |
| C | -1.3609037 | -1.2506187 | -4.0397929 |
| C | 0.6352267  | -0.1000995 | 0.2749155  |
| C | 2.6949591  | -2.1535771 | 1.5845045  |
| C | 0.1872735  | 0.3704864  | -1.0642463 |
| O | 0.9553720  | 0.6321244  | 1.2072329  |
| C | -0.2745257 | 2.1986427  | -2.7650126 |
| O | 0.6645153  | -1.4279849 | 0.4033071  |
| H | -0.9851511 | 1.4504264  | -3.1370904 |

|   |            |            |            |
|---|------------|------------|------------|
| H | 3.0441777  | -2.6651721 | 2.4960328  |
| H | -2.3445420 | -1.5098833 | -3.6170407 |
| C | -1.4695662 | -0.6223157 | -5.4118790 |
| H | 3.0058583  | -2.7599781 | 0.7197125  |
| C | 1.1627689  | 2.6817178  | -0.7234932 |
| H | -0.7541953 | -2.1691397 | -4.0483910 |
| C | -0.4854338 | -0.6704659 | -1.9064407 |
| C | 0.7706230  | 2.4214876  | -3.8760761 |
| H | -1.9433029 | -1.3348846 | -6.1049025 |
| H | 0.8554242  | -1.4020452 | 2.4841850  |
| C | 0.3690470  | 1.6713648  | -1.4858950 |
| H | -2.0824841 | 0.2920667  | -5.3880372 |
| O | -0.7221026 | -0.2927162 | -3.1566021 |
| C | -1.0859693 | 3.4801983  | -2.4852667 |
| H | 0.6710098  | -3.0032568 | 1.6594097  |
| H | -0.4755650 | -0.3661016 | -5.8098325 |
| C | 1.1861375  | -2.0274689 | 1.6437821  |
| H | 2.0245956  | 2.2364172  | -0.2097620 |
| H | 0.5449911  | 3.1913192  | 0.0618882  |
| H | 1.5225547  | 3.4726418  | -1.3956697 |
| H | 0.2672223  | 2.7663552  | -4.7935748 |
| H | 1.3073453  | 1.4902422  | -4.1094175 |
| H | 1.5091249  | 3.1894427  | -3.5972944 |
| H | -1.6366539 | 3.7659565  | -3.3957566 |
| H | -0.4478916 | 4.3308564  | -2.2027829 |
| H | -1.8195625 | 3.3271024  | -1.6789589 |
| C | -1.0931075 | -6.3153461 | 1.7834717  |
| H | -2.3332006 | -6.3626908 | -1.4696428 |
| H | -3.1854867 | -5.9073449 | 0.0291084  |
| C | -2.3660090 | -6.5228268 | -0.3786831 |
| H | 0.1901118  | -6.7947924 | -1.4193874 |
| H | -0.0528285 | -8.0469338 | -0.1634613 |
| H | 1.0780518  | -6.6943230 | 0.1220813  |
| H | -2.6064109 | -7.5844326 | -0.1925457 |

|    |            |            |            |
|----|------------|------------|------------|
| C  | -1.0211968 | -6.0897552 | 0.2538282  |
| Li | -0.4743669 | -3.1665113 | -0.3425976 |
| H  | -1.8903682 | -5.6873711 | 2.2143828  |
| O  | -0.7725630 | -4.7606079 | -0.0173564 |
| H  | -0.1408689 | -6.0173241 | 2.2539893  |
| H  | -1.2949430 | -7.3671462 | 2.0521974  |
| C  | 0.1108798  | -6.9684321 | -0.3330353 |
| C  | -0.6780442 | 5.2407684  | 3.6973366  |
| H  | -0.2284835 | 5.7666176  | 0.2825421  |
| H  | 0.8986923  | 6.1397726  | 1.6113628  |
| C  | -0.1668924 | 6.0196062  | 1.3539613  |
| H  | -2.3819879 | 4.4816576  | 0.7581352  |
| H  | -2.8546602 | 5.6721259  | 2.0046979  |
| H  | -2.7459053 | 3.9355726  | 2.4164247  |
| H  | -0.6686623 | 6.9901078  | 1.5111461  |
| C  | -0.7896780 | 4.8817958  | 2.1968141  |
| Li | 0.5692207  | 2.2136328  | 2.0924748  |
| H  | 0.3806738  | 5.3662166  | 3.9810132  |
| O  | -0.1292209 | 3.6935440  | 1.9447124  |
| H  | -1.0957345 | 4.4233749  | 4.3079592  |
| H  | -1.2122785 | 6.1726236  | 3.9511052  |
| C  | -2.2846553 | 4.7440423  | 1.8248849  |

**TS<sub>1g-B</sub>**

-----

|   |            |            |            |
|---|------------|------------|------------|
| O | -0.8345754 | -1.7547639 | -1.7348277 |
| H | 3.2582827  | -1.1939842 | 1.5495478  |
| C | -0.2561802 | -1.4634478 | -4.2766343 |
| C | 0.6867166  | -0.1853758 | 0.2550587  |
| C | 2.7839102  | -2.1865316 | 1.6040687  |
| C | 0.2442745  | 0.2960454  | -1.0485520 |
| O | 0.9931742  | 0.5345179  | 1.2192111  |
| C | -0.5399532 | 2.1763631  | -2.5911920 |
| O | 0.7476143  | -1.5227411 | 0.3986391  |

|   |            |            |            |
|---|------------|------------|------------|
| H | -1.1399898 | 1.3447714  | -2.9801142 |
| H | 3.1370398  | -2.6834478 | 2.5225119  |
| H | -1.3580630 | -1.4880813 | -4.2985030 |
| C | 0.3331844  | -1.0468849 | -5.6078920 |
| H | 3.1193648  | -2.7905271 | 0.7464527  |
| C | 0.9336960  | 2.6922304  | -0.6295493 |
| H | 0.0831587  | -2.4649502 | -3.9705015 |
| C | -0.2081141 | -0.7363460 | -2.0138180 |
| C | 0.3733783  | 2.6543272  | -3.7348210 |
| H | 0.0340012  | -1.7672348 | -6.3854317 |
| H | 0.9187696  | -1.4758161 | 2.4798455  |
| C | 0.2660727  | 1.6781972  | -1.3830082 |
| H | -0.0204332 | -0.0489369 | -5.9095659 |
| O | 0.1667686  | -0.5090409 | -3.2782422 |
| C | -1.5407541 | 3.2741470  | -2.1825372 |
| H | 0.7782757  | -3.0813062 | 1.6696992  |
| H | 1.4332227  | -1.0262027 | -5.5635929 |
| C | 1.2707909  | -2.0942310 | 1.6429978  |
| H | 1.8338851  | 2.3646437  | -0.0952322 |
| H | 0.2356404  | 3.1677067  | 0.4097817  |
| H | 1.1058118  | 3.6173908  | -1.1938342 |
| H | -0.2358480 | 2.9364428  | -4.6093634 |
| H | 1.0687107  | 1.8609879  | -4.0433183 |
| H | 0.9635690  | 3.5371899  | -3.4418839 |
| H | -2.1776912 | 3.5297544  | -3.0448586 |
| H | -1.0378803 | 4.1974247  | -1.8566293 |
| H | -2.1969064 | 2.9377782  | -1.3649177 |
| C | -1.7809691 | -5.3173240 | 2.5660189  |
| H | -1.5780752 | -6.3371209 | -0.7571135 |
| H | -2.9562168 | -5.5780172 | 0.0809167  |
| C | -2.0595574 | -6.2036992 | 0.2264223  |
| H | 0.6910374  | -6.5032474 | 0.4191411  |
| H | -0.0794171 | -7.3992754 | 1.7642472  |
| H | 0.8690717  | -5.9211145 | 2.0933830  |

|    |            |            |            |
|----|------------|------------|------------|
| H  | -2.3849181 | -7.1945481 | 0.5899850  |
| C  | -1.0809192 | -5.4951627 | 1.1953811  |
| Li | -0.6727967 | -2.9172428 | -0.2792090 |
| H  | -2.6687140 | -4.6732725 | 2.4491948  |
| O  | -0.7097477 | -4.2693335 | 0.6908289  |
| H  | -1.0977833 | -4.8201589 | 3.2755223  |
| H  | -2.1033904 | -6.2751176 | 3.0116906  |
| C  | 0.1678712  | -6.3923795 | 1.3834711  |
| C  | 0.1063408  | 5.8433583  | 1.2149375  |
| H  | -2.7280431 | 3.9894946  | 2.0414986  |
| H  | -2.2737974 | 4.6435965  | 0.4484568  |
| C  | -2.1685512 | 4.7916811  | 1.5342066  |
| H  | -1.1120036 | 4.1523446  | 4.0038279  |
| H  | -0.9780259 | 5.9162320  | 3.7861149  |
| H  | 0.4936487  | 4.9079316  | 3.7759369  |
| H  | -2.6342785 | 5.7568424  | 1.7940170  |
| C  | -0.6857597 | 4.7436074  | 1.9459690  |
| Li | 0.5487794  | 1.9842072  | 2.1615926  |
| H  | 0.0216626  | 5.7264812  | 0.1225790  |
| O  | -0.1469387 | 3.4744005  | 1.6335983  |
| H  | 1.1739084  | 5.7873446  | 1.4822449  |
| H  | -0.2631020 | 6.8484189  | 1.4755790  |
| C  | -0.5643864 | 4.9453609  | 3.4673063  |

**P<sub>1g-B</sub>**

-----

|   |            |            |            |
|---|------------|------------|------------|
| O | -0.8345754 | -1.7547639 | -1.7348277 |
| H | 3.2582827  | -1.1939842 | 1.5495478  |
| C | -0.2561802 | -1.4634478 | -4.2766343 |
| C | 0.6867166  | -0.1853758 | 0.2550587  |
| C | 2.7839102  | -2.1865316 | 1.6040687  |
| C | 0.2442745  | 0.2960454  | -1.0485520 |
| O | 0.9931742  | 0.5345179  | 1.2192111  |
| C | -0.5399532 | 2.1763631  | -2.5911920 |

|   |            |            |            |
|---|------------|------------|------------|
| O | 0.7476143  | -1.5227411 | 0.3986391  |
| H | -1.1399898 | 1.3447714  | -2.9801142 |
| H | 3.1370398  | -2.6834478 | 2.5225119  |
| H | -1.3580630 | -1.4880813 | -4.2985030 |
| C | 0.3331844  | -1.0468849 | -5.6078920 |
| H | 3.1193648  | -2.7905271 | 0.7464527  |
| C | 0.9336960  | 2.6922304  | -0.6295493 |
| H | 0.0831587  | -2.4649502 | -3.9705015 |
| C | -0.2081141 | -0.7363460 | -2.0138180 |
| C | 0.3733783  | 2.6543272  | -3.7348210 |
| H | 0.0340012  | -1.7672348 | -6.3854317 |
| H | 0.9187696  | -1.4758161 | 2.4798455  |
| C | 0.2660727  | 1.6781972  | -1.3830082 |
| H | -0.0204332 | -0.0489369 | -5.9095659 |
| O | 0.1667686  | -0.5090409 | -3.2782422 |
| C | -1.5407541 | 3.2741470  | -2.1825372 |
| H | 0.7782757  | -3.0813062 | 1.6696992  |
| H | 1.4332227  | -1.0262027 | -5.5635929 |
| C | 1.2707909  | -2.0942310 | 1.6429978  |
| H | 1.8338851  | 2.3646437  | -0.0952322 |
| H | 0.1722663  | 3.2185104  | 0.6125064  |
| H | 1.1058118  | 3.6173908  | -1.1938342 |
| H | -0.2358480 | 2.9364428  | -4.6093634 |
| H | 1.0687107  | 1.8609879  | -4.0433183 |
| H | 0.9635690  | 3.5371899  | -3.4418839 |
| H | -2.1776912 | 3.5297544  | -3.0448586 |
| H | -1.0378803 | 4.1974247  | -1.8566293 |
| H | -2.1969064 | 2.9377782  | -1.3649177 |
| C | -1.7809691 | -5.3173240 | 2.5660189  |
| H | -1.5780752 | -6.3371209 | -0.7571135 |
| H | -2.9562168 | -5.5780172 | 0.0809167  |
| C | -2.0595574 | -6.2036992 | 0.2264223  |
| H | 0.6910374  | -6.5032474 | 0.4191411  |
| H | -0.0794171 | -7.3992754 | 1.7642472  |



|    |            |            |            |
|----|------------|------------|------------|
| H  | 0.8690717  | -5.9211145 | 2.0933830  |
| H  | -2.3849181 | -7.1945481 | 0.5899850  |
| C  | -1.0809192 | -5.4951627 | 1.1953811  |
| Li | -0.6727967 | -2.9172428 | -0.2792090 |
| H  | -2.6687140 | -4.6732725 | 2.4491948  |
| O  | -0.7097477 | -4.2693335 | 0.6908289  |
| H  | -1.0977833 | -4.8201589 | 3.2755223  |
| H  | -2.1033904 | -6.2751176 | 3.0116906  |
| C  | 0.1678712  | -6.3923795 | 1.3834711  |
| C  | 0.1063408  | 5.8433583  | 1.2149375  |
| H  | -2.7280431 | 3.9894946  | 2.0414986  |
| H  | -2.2737974 | 4.6435965  | 0.4484568  |
| C  | -2.1685512 | 4.7916811  | 1.5342066  |
| H  | -1.1120036 | 4.1523446  | 4.0038279  |
| H  | -0.9780259 | 5.9162320  | 3.7861149  |
| H  | 0.4936487  | 4.9079316  | 3.7759369  |
| H  | -2.6342785 | 5.7568424  | 1.7940170  |
| C  | -0.6857597 | 4.7436074  | 1.9459690  |
| Li | 0.5487794  | 1.9842072  | 2.1615926  |
| H  | 0.0216626  | 5.7264812  | 0.1225790  |
| O  | -0.1469387 | 3.4744005  | 1.6335983  |
| H  | 1.1739084  | 5.7873446  | 1.4822449  |
| H  | -0.2631020 | 6.8484189  | 1.4755790  |
| C  | -0.5643864 | 4.9453609  | 3.4673063  |

## 2g'

---

|   |           |           |            |
|---|-----------|-----------|------------|
| O | 4.3293240 | 3.3002110 | 3.9698650  |
| H | 8.7940990 | 2.7194230 | -0.5372370 |
| C | 6.2984940 | 3.5821810 | 5.8134650  |
| C | 7.1551890 | 3.7953030 | 1.7816850  |
| C | 8.8031230 | 1.7465130 | -0.0235480 |
| C | 5.7130640 | 4.1336210 | 2.1677710  |
| O | 8.0373460 | 4.5675290 | 1.5109920  |

|   |           |           |            |
|---|-----------|-----------|------------|
| C | 6.4372780 | 6.5817650 | 1.9030500  |
| O | 7.3003360 | 2.4544650 | 1.7770600  |
| H | 9.7757890 | 1.2658090 | -0.2182200 |
| H | 5.2851380 | 3.8794090 | 6.1215680  |
| C | 6.5487030 | 2.1115560 | 6.1026230  |
| H | 8.0133310 | 1.1101460 | -0.4532460 |
| C | 3.9884090 | 5.9220300 | 1.8965130  |
| H | 7.0329130 | 4.2228190 | 6.3230540  |
| C | 5.4059170 | 3.7020830 | 3.6052760  |
| H | 6.4949270 | 1.9299150 | 7.1884150  |
| H | 9.3683600 | 2.5938560 | 1.8954220  |
| C | 5.2820780 | 5.5918620 | 2.0003880  |
| H | 5.7912050 | 1.4821900 | 5.6121020  |
| O | 6.4634640 | 3.8845570 | 4.4130090  |
| C | 6.3117710 | 7.6830930 | 2.9755600  |
| H | 8.6421240 | 0.9581700 | 1.9981120  |
| H | 7.5465000 | 1.8053580 | 5.7511510  |
| C | 8.6045180 | 1.9239590 | 1.4728430  |
| H | 5.0734820 | 3.4869430 | 1.5508080  |
| C | 6.6161640 | 7.2022180 | 0.5144840  |
| H | 7.5170700 | 7.8359600 | 0.4936810  |
| H | 5.7603790 | 7.8421470 | 0.2418380  |
| H | 6.7259700 | 6.4313020 | -0.2644250 |
| H | 6.2160540 | 7.2701800 | 3.9928210  |
| H | 5.4245270 | 8.3093560 | 2.7854200  |
| H | 7.1995700 | 8.3363140 | 2.9699550  |
| H | 3.6744120 | 6.9570210 | 1.7444430  |
| H | 3.2005850 | 5.1722100 | 1.9817850  |
| H | 7.3531450 | 6.0021260 | 2.1280470  |

**Figure 2 (c)**

**1h**

---

|   |           |           |           |
|---|-----------|-----------|-----------|
| O | 7.9199630 | 3.9902890 | 3.7116400 |
|---|-----------|-----------|-----------|

|   |           |           |            |
|---|-----------|-----------|------------|
| H | 5.8438150 | 1.3789020 | -0.9216100 |
| C | 6.3814260 | 3.1330230 | 5.7485180  |
| C | 6.5726770 | 3.5829280 | 1.0641200  |
| C | 6.4828620 | 0.7057200 | -0.3305700 |
| C | 6.0605670 | 4.3465840 | 2.2457410  |
| O | 6.6494610 | 3.9860590 | -0.0770140 |
| C | 3.9672340 | 5.4865240 | 3.1263150  |
| O | 6.9460690 | 2.3435710 | 1.4310510  |
| H | 6.9713540 | 0.0016910 | -1.0238040 |
| H | 7.3178380 | 2.5834750 | 5.5700370  |
| C | 6.6122950 | 4.3008400 | 6.6945560  |
| H | 5.8476780 | 0.1256890 | 0.3575500  |
| C | 5.1763080 | 6.3965380 | 1.0938220  |
| H | 5.6270550 | 2.4389570 | 6.1477380  |
| C | 6.7251730 | 3.9590620 | 3.5421600  |
| H | 6.9617310 | 3.9264550 | 7.6705660  |
| H | 8.1401790 | 2.1085470 | -0.2491420 |
| C | 5.1299660 | 5.3310570 | 2.1582090  |
| H | 7.3803500 | 4.9809470 | 6.2967180  |
| O | 5.8450250 | 3.5599120 | 4.4805260  |
| H | 8.2028800 | 0.8233210 | 0.9984910  |
| H | 5.6829330 | 4.8687560 | 6.8602930  |
| C | 7.5368260 | 1.4912300 | 0.4327960  |
| H | 4.1681260 | 6.5494460 | 0.6765190  |
| H | 5.8676600 | 6.1741750 | 0.2737980  |
| H | 5.4850650 | 7.3572430 | 1.5431000  |
| C | 2.6153380 | 5.1631980 | 2.5031750  |
| H | 3.9580810 | 6.5407930 | 3.4527090  |
| H | 4.1153150 | 4.8578610 | 4.0116570  |
| C | 2.2658210 | 3.8310120 | 2.2221120  |
| C | 1.6947050 | 6.1774790 | 2.1984990  |
| C | 0.4551390 | 5.8741190 | 1.6241430  |
| C | 1.0289690 | 3.5273520 | 1.6479220  |
| C | 0.1194440 | 4.5469870 | 1.3450020  |

|   |            |           |           |
|---|------------|-----------|-----------|
| H | 1.9458440  | 7.2194300 | 2.4206560 |
| H | -0.2499620 | 6.6787900 | 1.3976030 |
| H | -0.8484740 | 4.3067630 | 0.8966990 |
| H | 2.9709980  | 3.0353580 | 2.4734350 |
| H | 0.7715860  | 2.4851120 | 1.4391310 |

**R<sub>1h-A</sub>**

-----

|   |            |           |            |
|---|------------|-----------|------------|
| O | 6.4813000  | 2.7197000 | 4.6146000  |
| H | 10.1922000 | 2.2124000 | 1.2010000  |
| C | 4.0164000  | 3.0337000 | 5.6353000  |
| C | 6.6383000  | 2.4473000 | 1.6589000  |
| C | 9.5255000  | 1.5055000 | 0.6832000  |
| C | 5.8529000  | 3.4711000 | 2.4178000  |
| O | 6.3139000  | 2.0447000 | 0.5447000  |
| C | 5.6833000  | 4.9327000 | 0.3554000  |
| O | 7.7080000  | 1.9744000 | 2.2822000  |
| H | 10.1509000 | 0.6902000 | 0.2849000  |
| H | 3.1624000  | 3.6953000 | 5.8376000  |
| C | 3.6462000  | 1.5734000 | 5.8197000  |
| H | 9.0460000  | 2.0121000 | -0.1686000 |
| C | 4.5447000  | 5.6336000 | 2.5115000  |
| H | 4.8609000  | 3.3208000 | 6.2777000  |
| C | 5.6158000  | 3.1450000 | 3.8602000  |
| H | 3.3075000  | 1.4106000 | 6.8554000  |
| H | 8.9979000  | 0.4506000 | 2.5251000  |
| C | 5.3936000  | 4.6121000 | 1.8087000  |
| H | 2.8285000  | 1.2845000 | 5.1414000  |
| O | 4.3622000  | 3.3205000 | 4.2532000  |
| H | 7.8214000  | 0.2225000 | 1.1501000  |
| H | 4.5110000  | 0.9175000 | 5.6396000  |
| C | 8.5181000  | 0.9125000 | 1.6453000  |
| H | 4.9151000  | 6.6466000 | 2.3017000  |
| H | 4.4622000  | 5.4882000 | 3.5913000  |

|    |            |            |            |
|----|------------|------------|------------|
| H  | 3.5278000  | 5.5772000  | 2.0820000  |
| C  | 5.9741000  | 6.3893000  | 0.0415000  |
| H  | 4.7841000  | 4.5861000  | -0.2093000 |
| H  | 6.5182000  | 4.3227000  | -0.0162000 |
| C  | 7.1808000  | 6.9799000  | 0.4547000  |
| C  | 5.0642000  | 7.1675000  | -0.6897000 |
| C  | 5.3475000  | 8.5038000  | -0.9931000 |
| C  | 7.4656000  | 8.3145000  | 0.1555000  |
| C  | 6.5473000  | 9.0819000  | -0.5698000 |
| H  | 4.1271000  | 6.7188000  | -1.0304000 |
| H  | 4.6268000  | 9.0934000  | -1.5661000 |
| H  | 6.7699000  | 10.1255000 | -0.8074000 |
| H  | 7.9089000  | 6.3857000  | 1.0164000  |
| H  | 8.4101000  | 8.7560000  | 0.4851000  |
| C  | 11.5829000 | -0.0656000 | 4.6357000  |
| H  | 9.3440000  | 0.5005000  | 7.2414000  |
| H  | 10.7371000 | 1.4992000  | 6.7473000  |
| C  | 10.3325000 | 0.4730000  | 6.7523000  |
| H  | 8.6126000  | -1.4692000 | 5.7934000  |
| H  | 10.2521000 | -2.1776000 | 5.9007000  |
| H  | 9.5086000  | -1.8663000 | 4.3055000  |
| H  | 11.0014000 | -0.1582000 | 7.3636000  |
| C  | 10.1840000 | -0.0380000 | 5.2985000  |
| Li | 8.1834000  | 1.9520000  | 4.3267000  |
| H  | 11.9908000 | 0.9578000  | 4.5876000  |
| O  | 9.3389000  | 0.7856000  | 4.5840000  |
| H  | 11.5041000 | -0.4457000 | 3.6030000  |
| H  | 12.3023000 | -0.7017000 | 5.1805000  |
| C  | 9.6144000  | -1.4776000 | 5.3326000  |
| C  | 2.5885981  | 4.0700074  | -2.9328111 |
| H  | 2.5253933  | 0.7599331  | -1.8466564 |
| H  | 3.6024626  | 1.4887627  | -3.0602792 |
| C  | 2.6095074  | 1.5721834  | -2.5871343 |
| H  | 0.9753516  | 2.2280034  | -0.4592267 |

|    |           |           |            |
|----|-----------|-----------|------------|
| H  | 0.2509828 | 2.9220636 | -1.9378258 |
| H  | 0.9685763 | 3.9954524 | -0.7005931 |
| H  | 1.8416443 | 1.4158119 | -3.3644515 |
| C  | 2.4728455 | 2.9406336 | -1.8794825 |
| Li | 4.8195000 | 2.2257000 | -0.5689000 |
| H  | 3.5630226 | 4.0113759 | -3.4476612 |
| O  | 3.4609995 | 3.0806999 | -0.9249997 |
| H  | 2.5253361 | 5.0517554 | -2.4338042 |
| H  | 1.7977083 | 4.0198267 | -3.7010121 |
| C  | 1.0782461 | 3.0255828 | -1.2140610 |

**TS<sub>1h-A</sub>**

-----

|   |            |            |            |
|---|------------|------------|------------|
| O | -0.6267925 | 2.1052197  | -2.0042953 |
| H | 2.5249666  | 2.9911620  | 1.7406271  |
| C | -2.1806607 | 0.8526559  | -3.7634289 |
| C | 0.0292685  | 0.7366024  | 0.5182286  |
| C | 1.7358687  | 2.6345735  | 2.4205979  |
| C | -0.0903923 | 0.0820218  | -0.7959557 |
| O | -0.1134191 | 0.1543589  | 1.6049137  |
| C | 0.8768997  | -2.0994288 | 0.0331733  |
| O | 0.2953366  | 2.0438367  | 0.5091004  |
| H | 1.7708870  | 3.2597990  | 3.3275693  |
| H | -2.3085150 | 0.0724379  | -4.5281582 |
| C | -3.5188584 | 1.4296307  | -3.3351036 |
| H | 1.9499569  | 1.5949716  | 2.7122670  |
| C | 0.3543820  | -1.8075331 | -2.4173676 |
| H | -1.5165566 | 1.6370658  | -4.1543011 |
| C | -0.7294743 | 0.8890930  | -1.8602650 |
| H | -4.0333196 | 1.8604163  | -4.2092956 |
| H | 0.1838904  | 3.8183359  | 1.4470946  |
| C | 0.3655294  | -1.2391646 | -1.0162526 |
| H | -4.1658396 | 0.6483336  | -2.9060914 |
| O | -1.5208478 | 0.1758495  | -2.6701151 |

|    |            |            |            |
|----|------------|------------|------------|
| H  | -0.4365039 | 2.4171687  | 2.4300842  |
| H  | -3.3830193 | 2.2290235  | -2.5916687 |
| C  | 0.3703075  | 2.7832046  | 1.7803561  |
| H  | 1.1912568  | -2.5037819 | -2.5515567 |
| H  | 0.4126756  | -1.0345854 | -3.1902413 |
| H  | -0.5782649 | -2.3691323 | -2.5932411 |
| C  | 1.8404930  | -3.2253735 | -0.2270051 |
| H  | -0.2140479 | -2.6179432 | 0.5793686  |
| H  | 1.2111087  | -1.5265225 | 0.9083849  |
| C  | 3.1374105  | -3.1605635 | 0.3194796  |
| C  | 1.4955395  | -4.3923143 | -0.9367560 |
| C  | 2.4114107  | -5.4343028 | -1.1126646 |
| C  | 4.0542480  | -4.2012130 | 0.1505565  |
| C  | 3.6968991  | -5.3441280 | -0.5714611 |
| H  | 0.4896872  | -4.4965761 | -1.3496306 |
| H  | 2.1121784  | -6.3271319 | -1.6686790 |
| H  | 4.4116184  | -6.1602923 | -0.7056027 |
| H  | 3.4328986  | -2.2716198 | 0.8850349  |
| H  | 5.0546581  | -4.1167558 | 0.5842688  |
| C  | 1.3750858  | 6.9558374  | 0.4019414  |
| H  | -0.9546735 | 6.6031278  | -2.1620240 |
| H  | 0.8212976  | 6.6950778  | -2.2932144 |
| C  | -0.0438567 | 6.9940250  | -1.6773320 |
| H  | -2.0543902 | 6.4083423  | 0.1375447  |
| H  | -1.2469388 | 7.9214438  | 0.6501525  |
| H  | -1.0505014 | 6.4263482  | 1.6091271  |
| H  | -0.1005140 | 8.0970299  | -1.6745649 |
| C  | 0.0917208  | 6.3921591  | -0.2566871 |
| Li | 0.1126916  | 3.4822996  | -0.9758180 |
| H  | 2.2576543  | 6.6466125  | -0.1824070 |
| O  | 0.1578873  | 5.0183868  | -0.3214279 |
| H  | 1.4864451  | 6.5451443  | 1.4198194  |
| H  | 1.3731930  | 8.0578446  | 0.4737869  |
| C  | -1.1358060 | 6.8246301  | 0.5837357  |

|    |            |            |            |
|----|------------|------------|------------|
| C  | -1.2337544 | -5.2507467 | 1.7195038  |
| H  | -3.8155585 | -2.9338667 | 2.0353639  |
| H  | -2.8673725 | -3.7222178 | 3.3326444  |
| C  | -3.2308095 | -3.8316815 | 2.2969315  |
| H  | -3.1231494 | -3.2232508 | -0.4003604 |
| H  | -3.2580630 | -4.9964396 | -0.2160696 |
| H  | -1.7480112 | -4.2764058 | -0.8223547 |
| H  | -3.9094580 | -4.6999643 | 2.2684183  |
| C  | -2.0450409 | -4.0019528 | 1.3290693  |
| Li | -0.9414965 | -1.3416042 | 2.2079009  |
| H  | -0.8540491 | -5.1489619 | 2.7491085  |
| O  | -1.2333551 | -2.8509642 | 1.4318887  |
| H  | -0.3667224 | -5.3744825 | 1.0525005  |
| H  | -1.8442377 | -6.1675331 | 1.6655152  |
| C  | -2.5774099 | -4.1357968 | -0.1107120 |

**P<sub>1h-A</sub>**

-----

|   |            |            |            |
|---|------------|------------|------------|
| O | 0.1146832  | 2.5106798  | -2.2166149 |
| H | 2.3080360  | 3.0210363  | 1.8809766  |
| C | 0.1864796  | 1.5087826  | -4.6682997 |
| C | 0.1176151  | 0.7244637  | 0.1699563  |
| C | 1.5839741  | 2.4210809  | 2.4547494  |
| C | 0.0587142  | 0.3272468  | -1.1980835 |
| O | 0.0524122  | -0.0712167 | 1.1460229  |
| C | 0.9157757  | -1.9937472 | -1.0900522 |
| O | 0.2216558  | 2.0438042  | 0.4397459  |
| H | 1.5396464  | 2.8382619  | 3.4744933  |
| H | 0.6660483  | 0.8832826  | -5.4366841 |
| C | -1.1971417 | 1.9567757  | -5.1144685 |
| H | 1.9497381  | 1.3847313  | 2.5229859  |
| C | -1.2990912 | -1.5739431 | -2.2505884 |
| H | 0.8294023  | 2.3777402  | -4.4649015 |
| C | 0.0941480  | 1.2761749  | -2.2837499 |



|    |            |            |            |
|----|------------|------------|------------|
| H  | -1.1194808 | 2.5410875  | -6.0461317 |
| H  | -0.1431443 | 3.5358446  | 1.7255782  |
| C  | -0.0580238 | -1.1276697 | -1.5082941 |
| H  | -1.8525920 | 1.0922769  | -5.3082134 |
| O  | 0.1407633  | 0.6733085  | -3.5017229 |
| H  | -0.5258971 | 1.8868754  | 2.3777263  |
| H  | -1.6662583 | 2.5951762  | -4.3510115 |
| C  | 0.2042237  | 2.4947228  | 1.8263823  |
| H  | -1.1175759 | -2.4429505 | -2.9000524 |
| H  | -1.6868314 | -0.7548718 | -2.8665438 |
| H  | -2.0990344 | -1.8414250 | -1.5356498 |
| C  | 1.0202565  | -3.4626518 | -1.1802640 |
| H  | -0.4585308 | -4.1618585 | 1.2171653  |
| H  | 1.8191880  | -1.5176798 | -0.6853090 |
| C  | 2.3108594  | -4.0392189 | -1.1056379 |
| C  | -0.0762841 | -4.3545461 | -1.2758706 |
| C  | 0.1179168  | -5.7398736 | -1.3157189 |
| C  | 2.5026485  | -5.4197068 | -1.1518871 |
| C  | 1.4057380  | -6.2826700 | -1.2593646 |
| H  | -1.0946932 | -3.9684482 | -1.3080935 |
| H  | -0.7505058 | -6.3999199 | -1.3959054 |
| H  | 1.5529545  | -7.3649597 | -1.2971757 |
| H  | 3.1783170  | -3.3783909 | -1.0199655 |
| H  | 3.5165823  | -5.8260788 | -1.1034239 |
| C  | 0.0851654  | 6.9780101  | 1.4241897  |
| H  | -1.4900068 | 6.6861232  | -1.6674620 |
| H  | 0.1861828  | 7.1866430  | -1.3271888 |
| C  | -0.8355250 | 7.1539880  | -0.9124674 |
| H  | -2.9585271 | 5.7857130  | 0.2216215  |
| H  | -2.6875996 | 7.2834899  | 1.1659704  |
| H  | -2.3151749 | 5.6848422  | 1.8786414  |
| H  | -1.1784621 | 8.1922895  | -0.7526654 |
| C  | -0.8446500 | 6.3024775  | 0.3832898  |
| Li | -0.0067727 | 3.6536532  | -0.7566644 |

|    |            |            |           |
|----|------------|------------|-----------|
| H  | 1.1201268  | 6.9857343  | 1.0433266 |
| O  | -0.4166874 | 5.0244947  | 0.1235092 |
| H  | 0.0781793  | 6.4002401  | 2.3641933 |
| H  | -0.2091254 | 8.0172882  | 1.6571454 |
| C  | -2.2888283 | 6.2763016  | 0.9478328 |
| C  | -0.4894605 | -5.5901459 | 3.0658266 |
| H  | 1.9711177  | -3.1454407 | 3.4637112 |
| H  | 2.1124821  | -4.7403094 | 2.6665002 |
| C  | 1.5701462  | -4.1712316 | 3.4383831 |
| H  | -0.3043749 | -2.3010188 | 4.2221952 |
| H  | -0.5880285 | -3.7665651 | 5.2003562 |
| H  | -1.7677265 | -3.2913923 | 3.9566338 |
| H  | 1.7769774  | -4.6399916 | 4.4120179 |
| C  | 0.0678180  | -4.1666429 | 3.1590291 |
| Li | 0.1670705  | -1.8284306 | 1.1295492 |
| H  | 0.0439509  | -6.1670922 | 2.2946558 |
| O  | -0.0858986 | -3.5294517 | 1.8558876 |
| H  | -1.5614133 | -5.5775912 | 2.8076733 |
| H  | -0.3824989 | -6.1158447 | 4.0275197 |
| C  | -0.6914655 | -3.3313272 | 4.1942639 |

## 2h

-----

|   |           |           |            |
|---|-----------|-----------|------------|
| O | 5.4791240 | 2.7794290 | 5.2097930  |
| H | 7.4562090 | 2.9508460 | -0.6524210 |
| C | 7.0120420 | 4.9014370 | 5.8990140  |
| C | 6.2074660 | 2.7890990 | 2.1176110  |
| C | 6.8325890 | 2.0874460 | -0.9293240 |
| C | 5.1671820 | 3.5452050 | 2.9430820  |
| O | 7.4029360 | 2.8736470 | 2.2683030  |
| C | 5.4737350 | 6.0000340 | 2.5621470  |
| O | 5.6116670 | 2.0216280 | 1.1932720  |
| H | 7.4083860 | 1.4625440 | -1.6312810 |
| H | 6.3488950 | 4.4866800 | 6.6730700  |

|   |           |            |            |
|---|-----------|------------|------------|
| C | 8.3717260 | 4.2232660  | 5.9175600  |
| H | 5.9339270 | 2.4537210  | -1.4499020 |
| C | 3.5135230 | 4.7939320  | 1.4757330  |
| H | 7.1017450 | 5.9879410  | 6.0442760  |
| C | 5.6784270 | 3.6414000  | 4.3889640  |
| H | 8.8744310 | 4.4177130  | 6.8791800  |
| H | 7.3534070 | 0.9438470  | 0.8451100  |
| C | 4.7670220 | 4.8786500  | 2.3079160  |
| H | 8.2666070 | 3.1350780  | 5.7970180  |
| O | 6.3754610 | 4.7587810  | 4.6133170  |
| C | 5.2637410 | 7.3708490  | 2.0576580  |
| H | 5.8593530 | 0.3904880  | 0.0237780  |
| H | 9.0102690 | 4.6035170  | 5.1054180  |
| C | 6.4580260 | 1.2719100  | 0.2965390  |
| H | 4.2800350 | 2.8981740  | 2.9938940  |
| H | 3.0679720 | 5.7782880  | 1.2811100  |
| H | 2.7592420 | 4.1737580  | 1.9905640  |
| H | 3.7067100 | 4.3044920  | 0.5037340  |
| C | 5.3883230 | 9.7747150  | 2.4921940  |
| C | 5.5582110 | 8.4548490  | 2.9114000  |
| H | 5.9169260 | 8.2493020  | 3.9241000  |
| C | 4.8316210 | 7.6661620  | 0.7483070  |
| C | 4.6672290 | 8.9879260  | 0.3259020  |
| H | 4.6531700 | 6.8546910  | 0.0405340  |
| C | 4.9365760 | 10.0482420 | 1.1965110  |
| H | 4.3363910 | 9.1903690  | -0.6965890 |
| H | 5.6142040 | 10.5952520 | 3.1788250  |
| H | 4.8077820 | 11.0816310 | 0.8636990  |
| H | 6.2933210 | 5.9121040  | 3.2834360  |

**R<sub>1h-B</sub>**

-----

|   |            |            |            |
|---|------------|------------|------------|
| O | 0.6318657  | -0.4667067 | 1.9418828  |
| H | -4.1693922 | 0.7740931  | -2.6129510 |

|   |            |            |            |
|---|------------|------------|------------|
| C | 1.5638248  | -2.8893056 | 1.1418707  |
| C | -1.1809572 | -0.5462636 | -1.1487517 |
| C | -3.9103615 | -0.2875757 | -2.7484175 |
| C | -0.2323554 | 0.1332489  | -0.2246135 |
| O | -1.5851321 | -1.6916707 | -0.9715972 |
| C | -0.6737736 | 2.5378194  | -1.0033192 |
| O | -1.5467272 | 0.1529281  | -2.2180020 |
| H | -4.5657088 | -0.7011341 | -3.5317612 |
| H | 1.2583329  | -3.8724261 | 0.7442313  |
| C | 3.0474707  | -2.6218721 | 0.9953120  |
| H | -4.1166547 | -0.8293219 | -1.8135396 |
| C | 1.1133294  | 2.0727879  | 0.6785894  |
| H | 1.2187926  | -2.7659560 | 2.1769657  |
| C | 0.4263287  | -0.7768823 | 0.7732190  |
| H | 3.6027229  | -3.3728070 | 1.5802349  |
| H | -2.2498324 | 0.0828337  | -4.1069369 |
| C | 0.0617106  | 1.4811679  | -0.2023335 |
| H | 3.3628697  | -2.7135860 | -0.0554746 |
| O | 0.7903548  | -1.9607310 | 0.2943325  |
| H | -2.1933169 | -1.5102544 | -3.2890037 |
| H | 3.3304853  | -1.6252625 | 1.3699925  |
| C | -2.4614904 | -0.4511316 | -3.1701887 |
| H | 1.5278859  | 2.9744460  | 0.2050370  |
| H | 1.9348255  | 1.3850805  | 0.9171139  |
| H | 0.6517199  | 2.3958868  | 1.6494911  |
| C | 0.1555247  | 3.1672565  | -2.1169522 |
| H | -0.9284408 | 3.3265940  | -0.2755105 |
| H | -1.6137309 | 2.1548355  | -1.4119964 |
| C | 0.7620283  | 2.3773676  | -3.1081765 |
| C | 0.3074027  | 4.5607815  | -2.1861988 |
| C | 1.0384635  | 5.1529727  | -3.2212429 |
| C | 1.4970999  | 2.9668795  | -4.1402040 |
| C | 1.6367288  | 4.3573061  | -4.2017952 |
| H | -0.1544276 | 5.1923187  | -1.4214600 |

|    |            |            |            |
|----|------------|------------|------------|
| H  | 1.1428274  | 6.2406911  | -3.2570725 |
| H  | 2.2117672  | 4.8176439  | -5.0095478 |
| H  | 0.6541882  | 1.2909078  | -3.0733550 |
| H  | 1.9641534  | 2.3356279  | -4.9012308 |
| C  | 1.3800016  | -6.4526928 | -1.5113537 |
| H  | -0.9310979 | -6.8118861 | 1.0707607  |
| H  | 0.8387995  | -6.6471968 | 1.1906248  |
| C  | 0.0180961  | -6.9944720 | 0.5400405  |
| H  | -2.0859258 | -6.5680163 | -1.1976871 |
| H  | -1.0241128 | -7.8142617 | -1.9169999 |
| H  | -1.1216232 | -6.1856771 | -2.6487801 |
| H  | 0.1327695  | -8.0829793 | 0.3961006  |
| C  | 0.0293210  | -6.2091212 | -0.7940705 |
| Li | -0.7021604 | -3.3102558 | -0.5960081 |
| H  | 2.2125188  | -6.0962374 | -0.8810480 |
| O  | -0.1376113 | -4.8623111 | -0.5512131 |
| H  | 1.4062575  | -5.8830176 | -2.4550740 |
| H  | 1.5573260  | -7.5179460 | -1.7420763 |
| C  | -1.1149354 | -6.7367433 | -1.6931102 |
| C  | -1.4901446 | 4.2844579  | 3.0581645  |
| H  | -0.6620720 | 2.8350506  | 6.1123609  |
| H  | -2.1862537 | 2.6858624  | 5.1992697  |
| C  | -1.3178965 | 3.3401010  | 5.3837557  |
| H  | 1.3507541  | 3.9894985  | 5.0537977  |
| H  | 0.3799292  | 5.4643507  | 4.7674372  |
| H  | 1.2298069  | 4.6682318  | 3.4118117  |
| H  | -1.6815191 | 4.2779529  | 5.8383793  |
| C  | -0.5490713 | 3.5765599  | 4.0630689  |
| Li | 0.2509189  | 0.7956807  | 3.2565045  |
| H  | -2.3436739 | 3.6274772  | 2.8220116  |
| O  | -0.1262531 | 2.3681103  | 3.5432233  |
| H  | -0.9523825 | 4.4964508  | 2.1175724  |
| H  | -1.8832588 | 5.2404593  | 3.4443552  |
| C  | 0.6691783  | 4.4868065  | 4.3441218  |

**TS<sub>1h-B</sub>**

-----

|   |            |            |            |
|---|------------|------------|------------|
| O | 1.0048846  | -0.2970783 | 2.0552573  |
| H | -3.1369456 | 0.5817399  | -3.4246500 |
| C | 1.5747710  | -2.8780002 | 1.6712561  |
| C | -0.6270267 | -0.6955501 | -1.1990486 |
| C | -2.8713867 | -0.4871430 | -3.4343008 |
| C | 0.0517813  | 0.0502744  | -0.1191482 |
| O | -1.0732849 | -1.8374835 | -1.1057286 |
| C | -0.7973339 | 2.3372782  | -0.9362027 |
| O | -0.6994752 | -0.0413989 | -2.3658086 |
| H | -3.3264630 | -0.9421038 | -4.3289197 |
| H | 1.2030371  | -3.8877193 | 1.4254341  |
| C | 3.0770549  | -2.7528201 | 1.5126653  |
| H | -3.3064264 | -0.9738798 | -2.5486876 |
| C | 0.9798413  | 2.2340054  | 0.7671736  |
| H | 1.2398180  | -2.5785037 | 2.6733901  |
| C | 0.6686710  | -0.7453171 | 0.9480183  |
| H | 3.5694129  | -3.4423208 | 2.2177392  |
| H | -0.9259735 | -0.1930643 | -4.3619126 |
| C | 0.1360654  | 1.4705572  | -0.0947423 |
| H | 3.3890425  | -3.0354863 | 0.4952959  |
| O | 0.8724192  | -2.0446348 | 0.6866426  |
| H | -1.0998385 | -1.7460572 | -3.4854021 |
| H | 3.4341035  | -1.7333355 | 1.7276193  |
| C | -1.3646688 | -0.6791639 | -3.4789512 |
| H | 1.1549403  | 3.2558692  | 0.4050327  |
| H | 1.8991933  | 1.7498188  | 1.1176513  |
| H | 0.3592716  | 2.4742861  | 1.9202428  |
| C | -0.1292823 | 3.1713986  | -2.0199524 |
| H | -1.2750482 | 3.0288774  | -0.2219497 |
| H | -1.6080001 | 1.7463434  | -1.3776961 |
| C | 0.8995393  | 2.6553174  | -2.8251111 |
| C | -0.5626077 | 4.4860477  | -2.2558841 |

|    |            |            |            |
|----|------------|------------|------------|
| C  | 0.0053411  | 5.2618002  | -3.2713713 |
| C  | 1.4732773  | 3.4304979  | -3.8366015 |
| C  | 1.0272593  | 4.7359892  | -4.0664358 |
| H  | -1.3578884 | 4.9104292  | -1.6351625 |
| H  | -0.3490794 | 6.2829823  | -3.4367136 |
| H  | 1.4771809  | 5.3407762  | -4.8583209 |
| H  | 1.2513331  | 1.6351880  | -2.6595588 |
| H  | 2.2756393  | 3.0103406  | -4.4496201 |
| C  | -1.1384707 | -6.8627385 | -0.9026221 |
| H  | 1.9211070  | -6.5715158 | 0.7395107  |
| H  | 1.6139294  | -6.5637427 | -1.0154934 |
| C  | 1.2274112  | -6.9185793 | -0.0456102 |
| H  | -0.0273704 | -6.4502981 | 2.3734479  |
| H  | -0.7666124 | -7.9088408 | 1.6511860  |
| H  | -1.7005890 | -6.3863061 | 1.7661717  |
| H  | 1.2388044  | -8.0229677 | -0.0481819 |
| C  | -0.1852012 | -6.3297162 | 0.1953347  |
| Li | -0.4535023 | -3.3748074 | -0.2566493 |
| H  | -0.7914688 | -6.5225280 | -1.8928962 |
| O  | -0.1346223 | -4.9546536 | 0.1603208  |
| H  | -2.1528849 | -6.4592379 | -0.7433934 |
| H  | -1.2042554 | -7.9650959 | -0.9186206 |
| C  | -0.6998418 | -6.8090037 | 1.5757907  |
| C  | -1.6470233 | 4.2688983  | 2.7705442  |
| H  | -0.3451560 | 3.0389815  | 5.7573657  |
| H  | -1.9378899 | 2.6977733  | 5.0214380  |
| C  | -1.1251099 | 3.4392739  | 5.0881095  |
| H  | 1.4122435  | 4.3320413  | 4.4441662  |
| H  | 0.2760350  | 5.6922713  | 4.2212035  |
| H  | 1.0477124  | 4.9311859  | 2.8055861  |
| H  | -1.5311645 | 4.3541533  | 5.5500565  |
| C  | -0.5419467 | 3.7180384  | 3.6917045  |
| Li | 0.5634973  | 0.8959401  | 3.3221608  |
| H  | -2.4527139 | 3.5258878  | 2.6582175  |

|   |            |           |           |
|---|------------|-----------|-----------|
| O | -0.0571724 | 2.4969047 | 3.1733722 |
| H | -1.2432282 | 4.4926333 | 1.7693400 |
| H | -2.0837727 | 5.1984116 | 3.1703781 |
| C | 0.6132901  | 4.7315553 | 3.7985500 |

**P<sub>1h-B</sub>**

---

|   |            |            |            |
|---|------------|------------|------------|
| O | 0.7031883  | 0.0530765  | 1.0390991  |
| H | -2.2988964 | -0.4519128 | -5.0259917 |
| C | 0.6026173  | -2.5648082 | 1.5756543  |
| C | 0.1280413  | -1.0506024 | -2.4245925 |
| C | -1.7011804 | -1.3778055 | -5.0199704 |
| C | 0.3723534  | -0.2050948 | -1.2910397 |
| O | 0.0385577  | -2.2842303 | -2.4491502 |
| C | -0.9380243 | 1.9492954  | -1.7711060 |
| O | 0.0035312  | -0.3449912 | -3.5850654 |
| H | -1.8396431 | -1.8800273 | -5.9916462 |
| H | 0.1260730  | -3.5523277 | 1.4712237  |
| C | 2.0516809  | -2.6964322 | 2.0078676  |
| H | -2.0863791 | -2.0441787 | -4.2340459 |
| C | 1.5536730  | 1.9871314  | -1.3401960 |
| H | 0.0321158  | -1.9153147 | 2.2539190  |
| C | 0.5350721  | -0.6923259 | 0.0326894  |
| H | 2.0913833  | -3.1696018 | 3.0031140  |
| H | 0.1700857  | -0.4303882 | -5.5938843 |
| C | 0.4078865  | 1.2836492  | -1.4695990 |
| H | 2.6076032  | -3.3425531 | 1.3103272  |
| O | 0.4916218  | -2.0281090 | 0.2256735  |
| H | 0.3584939  | -2.0094794 | -4.7722008 |
| H | 2.5515100  | -1.7176604 | 2.0710742  |
| C | -0.2265703 | -1.0787547 | -4.7972732 |
| H | 1.5894926  | 3.0744555  | -1.4564922 |
| H | 2.5057495  | 1.4646217  | -1.1947309 |
| H | 1.4548466  | 4.0361190  | 2.0385354  |



|    |            |            |            |
|----|------------|------------|------------|
| C  | -1.0105190 | 3.4541782  | -1.6594908 |
| H  | -1.6883431 | 1.4910186  | -1.1054229 |
| H  | -1.2122349 | 1.6241125  | -2.7884343 |
| C  | -0.4821425 | 4.2914587  | -2.6573391 |
| C  | -1.6129183 | 4.0593657  | -0.5410638 |
| C  | -1.6687771 | 5.4533892  | -0.4130491 |
| C  | -0.5328186 | 5.6833119  | -2.5321446 |
| C  | -1.1208884 | 6.2710441  | -1.4072131 |
| H  | -2.0709759 | 3.4262018  | 0.2257832  |
| H  | -2.1643220 | 5.9019400  | 0.4532809  |
| H  | -1.1683407 | 7.3591920  | -1.3148252 |
| H  | -0.0276756 | 3.8438359  | -3.5458005 |
| H  | -0.1168568 | 6.3140200  | -3.3225864 |
| C  | -0.6614335 | -7.0481203 | -1.3431064 |
| H  | 0.3886103  | -6.3997184 | 1.9151040  |
| H  | 1.3880287  | -6.8565522 | 0.5124784  |
| C  | 0.3768385  | -6.9290754 | 0.9469903  |
| H  | -2.0632443 | -5.7947791 | 1.5892998  |
| H  | -2.3821187 | -7.3824415 | 0.8264261  |
| H  | -2.7917345 | -5.8653878 | -0.0333798 |
| H  | 0.1562255  | -7.9944058 | 1.1406362  |
| C  | -0.6458187 | -6.2597814 | -0.0077946 |
| Li | 0.0285744  | -3.5240496 | -1.0528518 |
| H  | 0.3351960  | -6.9999407 | -1.8138513 |
| O  | -0.3040584 | -4.9488706 | -0.2248991 |
| H  | -1.3837564 | -6.5861093 | -2.0373533 |
| H  | -0.9344707 | -8.1114014 | -1.2165958 |
| C  | -2.0552486 | -6.3447204 | 0.6331457  |
| C  | -0.0220778 | 4.5517524  | 4.1395160  |
| H  | 2.0504403  | 1.8049423  | 4.7199404  |
| H  | 0.2689364  | 1.8229594  | 4.5275847  |
| C  | 1.1429776  | 2.4197831  | 4.8354743  |
| H  | 3.4049457  | 3.8956176  | 4.2551044  |
| H  | 2.4528893  | 4.8402072  | 5.4338743  |

|    |            |           |           |
|----|------------|-----------|-----------|
| H  | 2.5940051  | 5.4053234 | 3.7528570 |
| H  | 1.0303739  | 2.6550528 | 5.9042084 |
| C  | 1.2482983  | 3.7050693 | 4.0140781 |
| Li | 1.0328297  | 1.6169931 | 1.8126464 |
| H  | -0.9085557 | 3.9741051 | 3.8350523 |
| O  | 1.3805348  | 3.2666128 | 2.6285816 |
| H  | 0.0401277  | 5.4528556 | 3.5071979 |
| H  | -0.1678143 | 4.8842455 | 5.1790423 |
| C  | 2.4988429  | 4.5068248 | 4.3854603 |

## 2h'

-----

|   |           |           |            |
|---|-----------|-----------|------------|
| O | 4.2943420 | 1.3354070 | 3.0648430  |
| H | 8.1733330 | 4.6702380 | 6.3932660  |
| C | 2.5533700 | 1.5714470 | 1.0081540  |
| C | 5.0196160 | 3.7471070 | 4.4217090  |
| C | 7.2618890 | 4.2210980 | 6.8155060  |
| C | 5.0473220 | 3.6207420 | 2.8957010  |
| O | 4.3378940 | 3.0776520 | 5.1586590  |
| C | 5.7550860 | 5.5649590 | 1.3287640  |
| O | 5.8854990 | 4.6855240 | 4.8357760  |
| H | 7.2950650 | 4.3492110 | 7.9097630  |
| H | 1.6031990 | 1.6749680 | 1.5525450  |
| C | 2.3331970 | 1.5976340 | -0.4949470 |
| H | 7.2616860 | 3.1412400 | 6.5981200  |
| C | 3.4208410 | 5.3873150 | 2.2806970  |
| H | 3.0524250 | 0.6445710 | 1.3268210  |
| C | 4.2288450 | 2.3915080 | 2.4883820  |
| H | 1.7110480 | 0.7390620 | -0.7962780 |
| H | 6.0309770 | 5.9736390 | 6.4577660  |
| C | 4.6639350 | 4.9046550 | 2.1580960  |
| H | 1.8182010 | 2.5210130 | -0.7983610 |
| O | 3.4445970 | 2.6268990 | 1.4255730  |
| C | 5.4355510 | 6.9382990 | 0.7827130  |

|   |           |            |            |
|---|-----------|------------|------------|
| H | 5.1026570 | 4.4571980  | 6.6859520  |
| H | 3.2916260 | 1.5410910  | -1.0334880 |
| C | 6.0177900 | 4.8918350  | 6.2580220  |
| H | 5.9932310 | 4.8875390  | 0.4891370  |
| H | 6.6663140 | 5.6111610  | 1.9455340  |
| C | 5.6731620 | 8.0871050  | 1.5555360  |
| C | 4.8891390 | 7.1006850  | -0.5000920 |
| C | 4.5893360 | 8.3724300  | -0.9992400 |
| C | 5.3754030 | 9.3598390  | 1.0612640  |
| C | 4.8320380 | 9.5070110  | -0.2194630 |
| H | 4.6977340 | 6.2176450  | -1.1175300 |
| H | 4.1674040 | 8.4766350  | -2.0027710 |
| H | 4.6016670 | 10.5024130 | -0.6087010 |
| H | 6.0980380 | 7.9785210  | 2.5579610  |
| H | 5.5712070 | 10.2417710 | 1.6775710  |
| H | 3.1191730 | 6.3191700  | 1.7970500  |
| H | 2.6652640 | 4.8645000  | 2.8741450  |
| H | 6.0856240 | 3.3695760  | 2.6328980  |

## References

- 1 C. F. H. Allen and F. W. Spangler, Ethyl benzalmalonate, *Org. Syn.*, 1945, **25**, 42.
- 2 A. Miersch, K. Harms and G. Hilt, Zinc-mediated addition of diethyl bromomalonate to alkynes for the cascade reaction towards polysubstituted pyranones and tetracarbonyl derivatives, *Chem. Commun.*, 2014, **50**, 542.
- 3 G. de la Herrán, A. G. ScDate, R. Singh and S. K. Ghosh, 1,6-Conjugate Addition of Boronic Acids to 2-Allylidenemalonates, *Synlett*, 2009, 585.
- 4 S. M. Date, R. Singh and S. K. Ghosh, The unprecedented reaction of dimethylsulfonium methylide with Michael acceptors: synthesis of 1-substituted vinyl silanes and styrenes, *Org. Biomol. Chem.*, 2005, **3**, 3369.
- 5 L. Simóm, J. M. Goodman, How reliable are DFT transition structures? Comparison of GGA, hybrid-meta-GGA and meta-GGA functionals, *Org. Biomol. Chem.*, 2011, **9**, 689.
- 6 J. L. Borioni, M. Puiatti, D. M. A. Verab, A. B. Pierini, In search of the best DFT functional for dealing with organic anionic species, *Phys. Chem. Chem. Phys.*, 2017, **19**, 9189.
- 7 J. Tirado-Rivers, W. L. Jorgensen, *J. Chem. Theory Comput*, Performance of B3LYP Density Functional Methods for a Large Set of Organic Molecules, 2008, **4**, 297.
- 8 TURBOMOLE V7.0 2015, a development of University of Karlsruhe and Forschungszentrum Karlsruhe GmbH, 1989-2007.
- 9 Auxiliary Basis Sets to Approximate Coulomb Potentials. K. Eichkorn, O. Treutler, H. Öhm, M. Häser and R. Ahlrichs, Auxiliary basis sets to approximate Coulomb potentials, *Chem. Phys. Lett.*, **1995**, 242, 652.
- 10 Electronic Structure Calculations on Workstation Computers: The Program System TURBOMOLE. R. Ahlrichs, M. Bär, M. Häser, H. Horn and C. Kölmel; *Chem. Phys. Letters*, **1989**, 162, 165.
- 11 A., Klamt; G., Schüürmann. "COSMO: a new approach to dielectric screening in solvents with explicit expressions for the screening energy and its gradient". *J. Chem. Soc. Perkin Trans.2.*, **1993**, 2, 799.

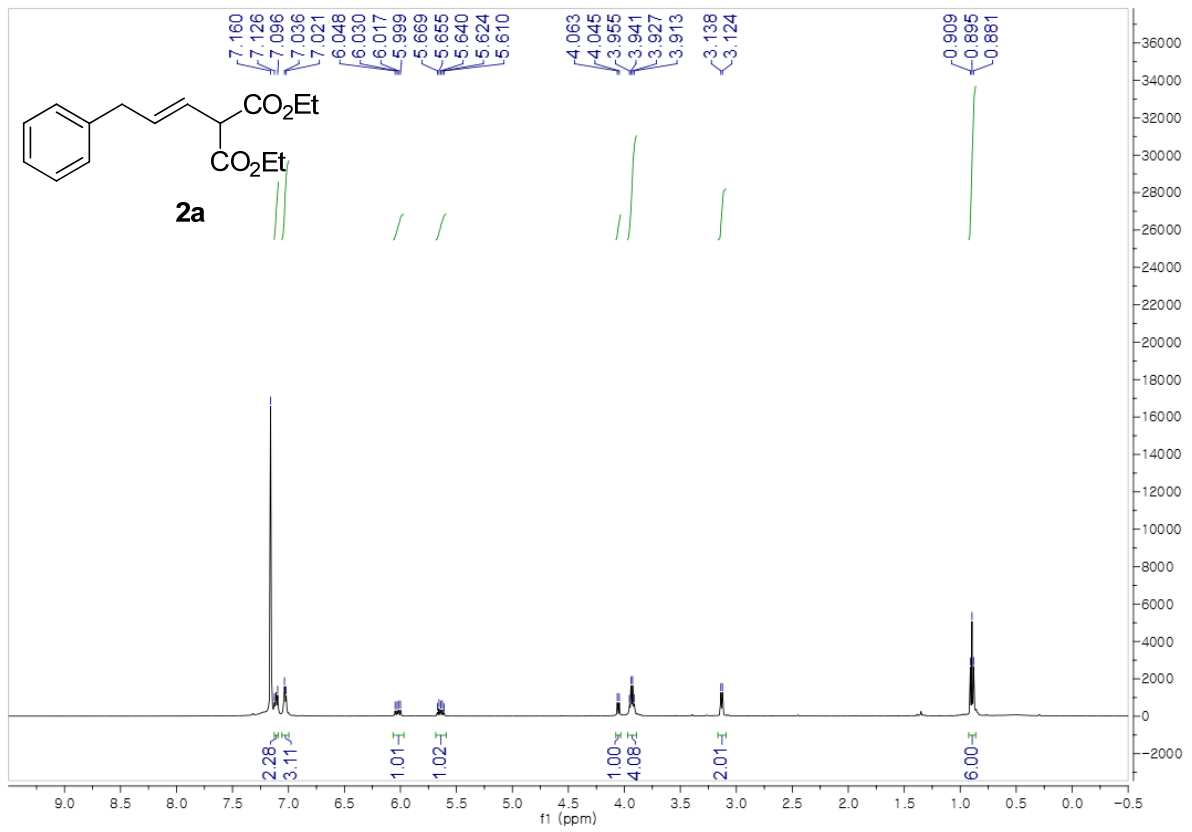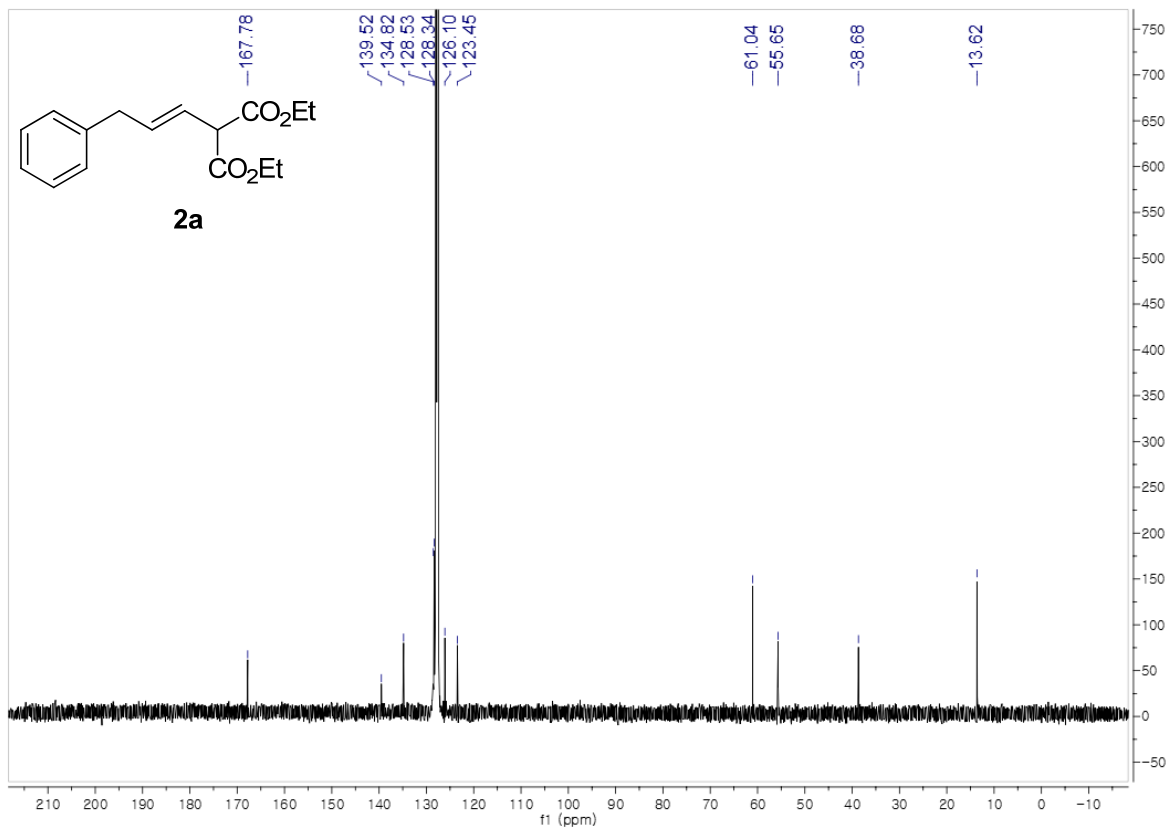

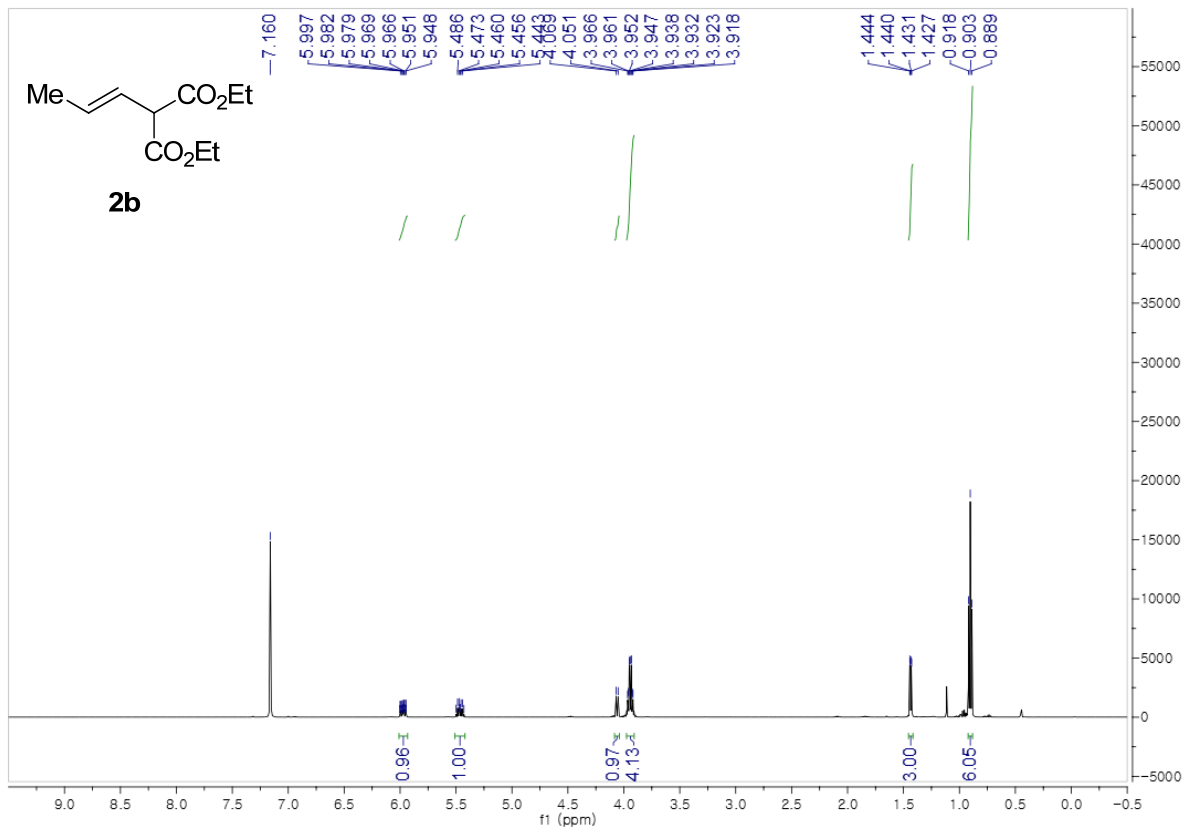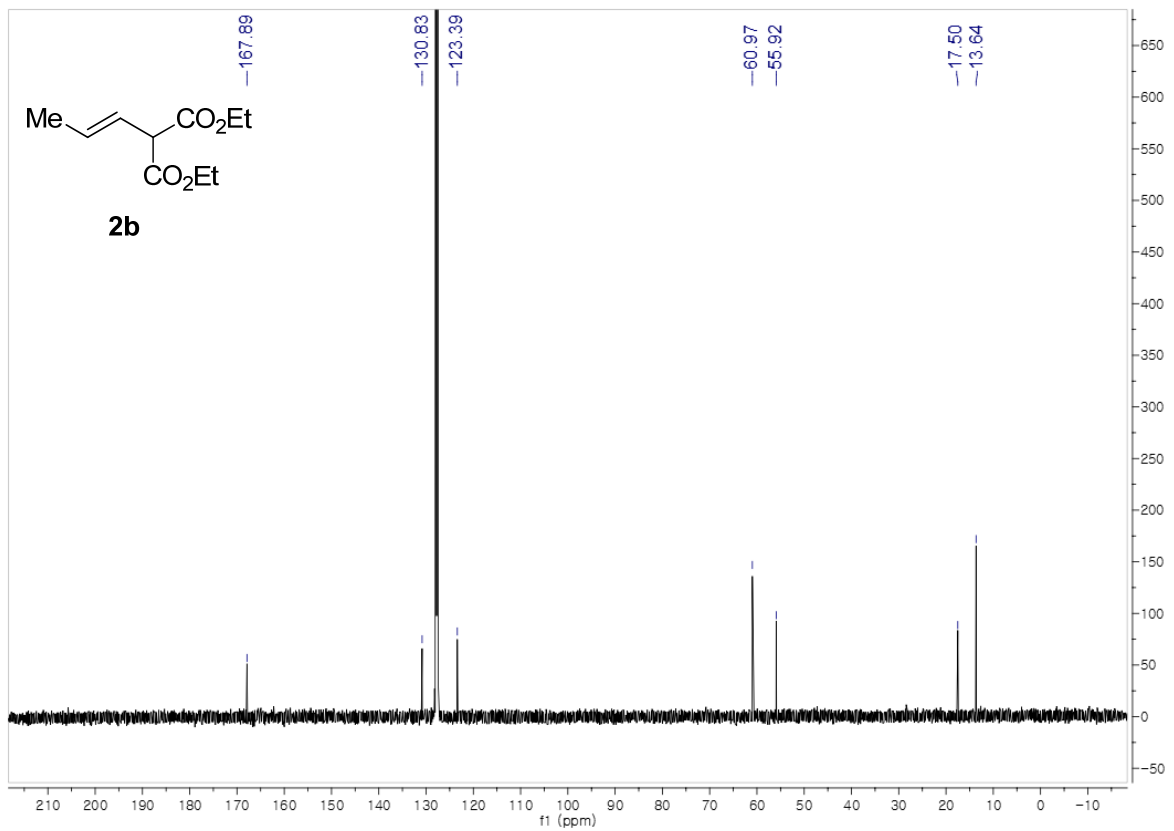

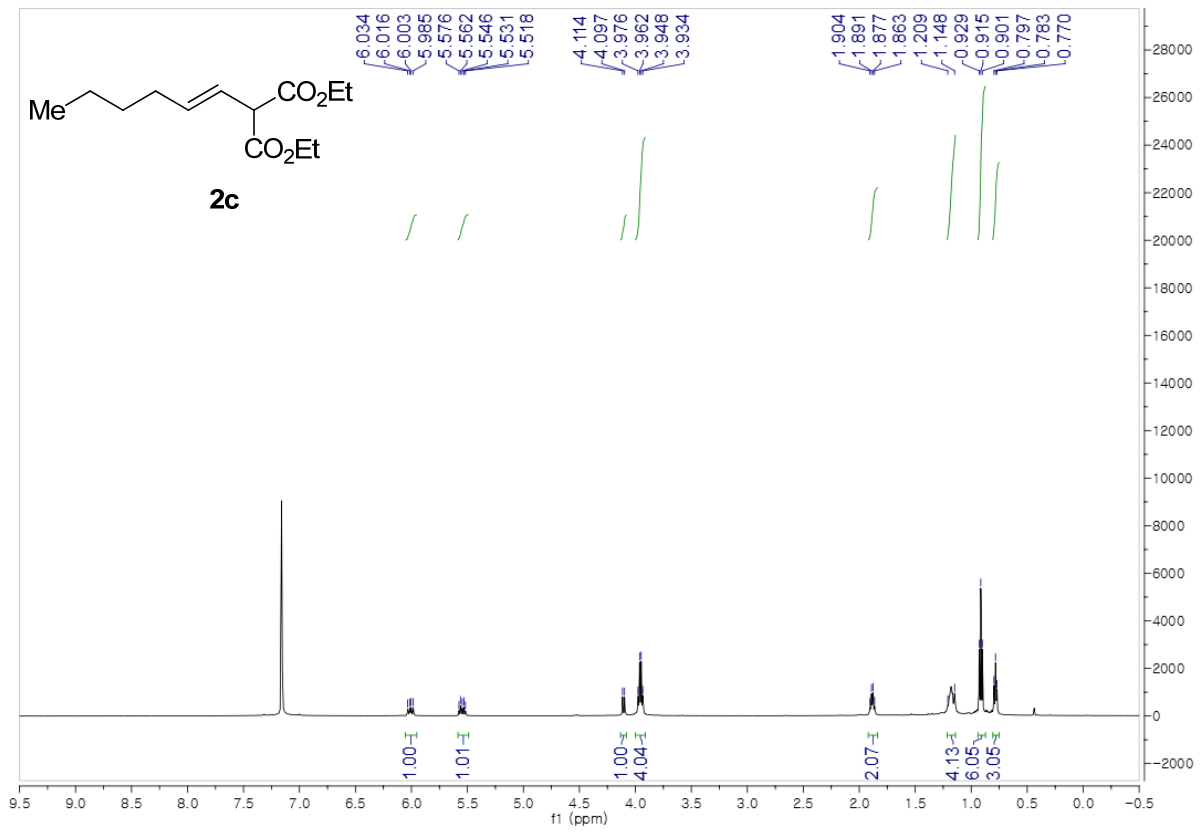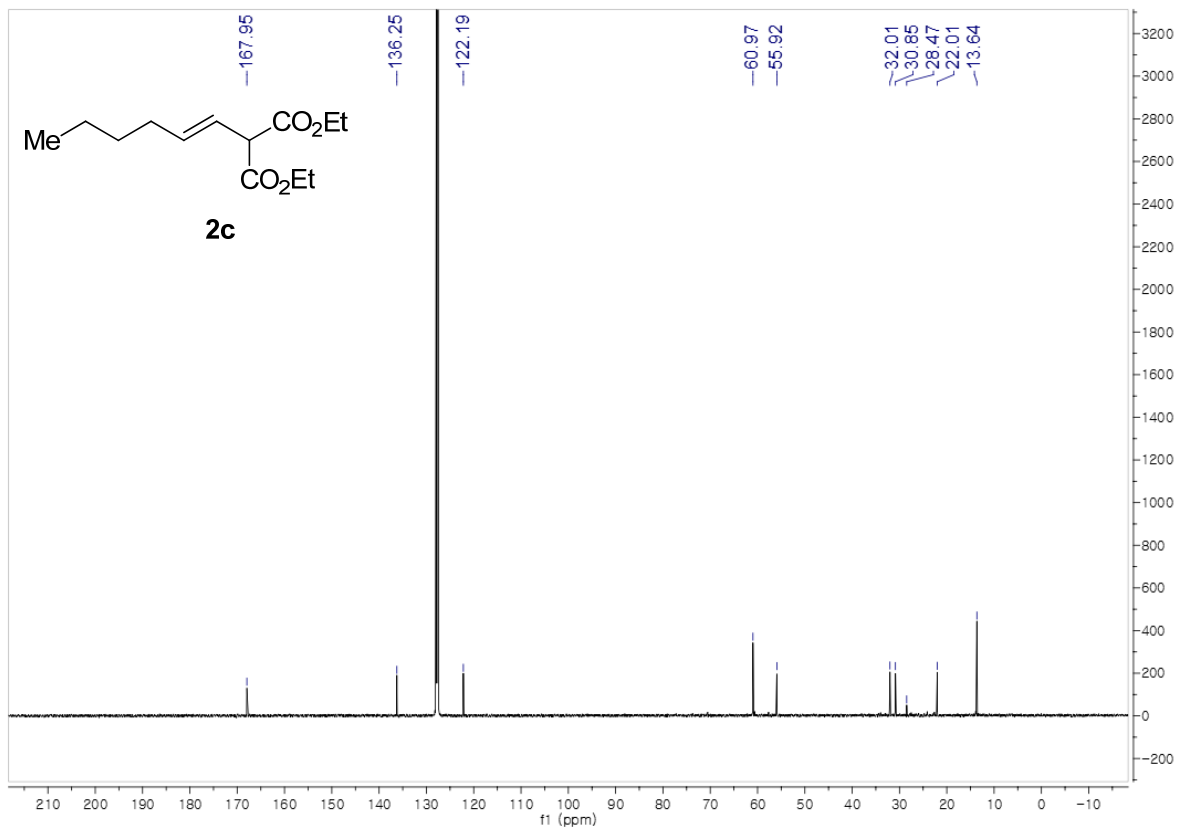

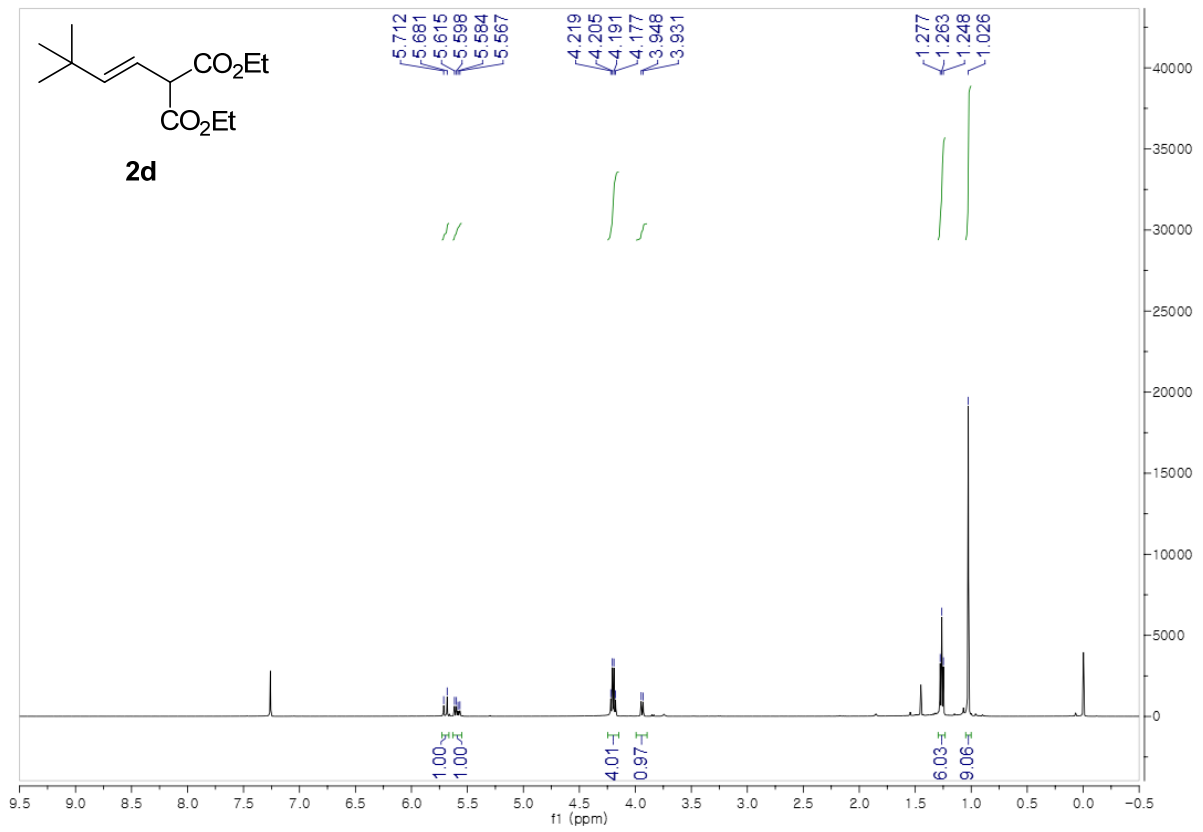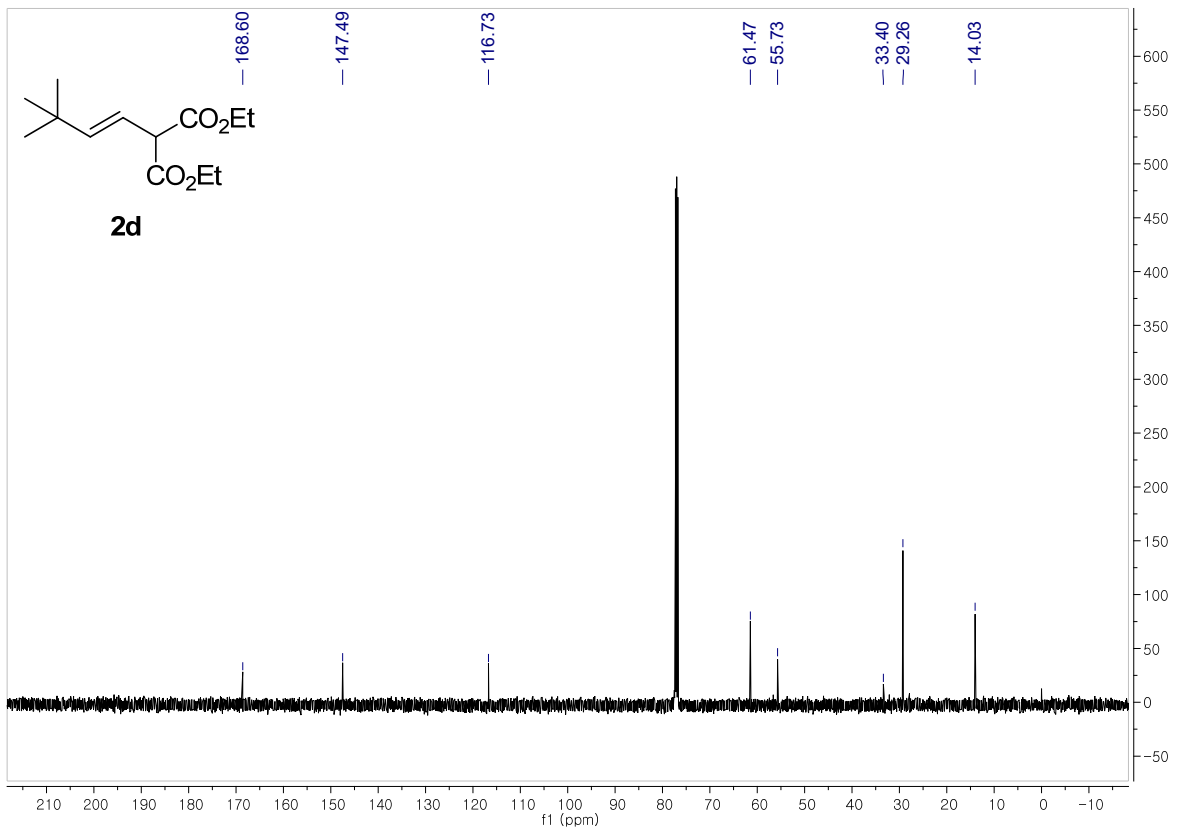



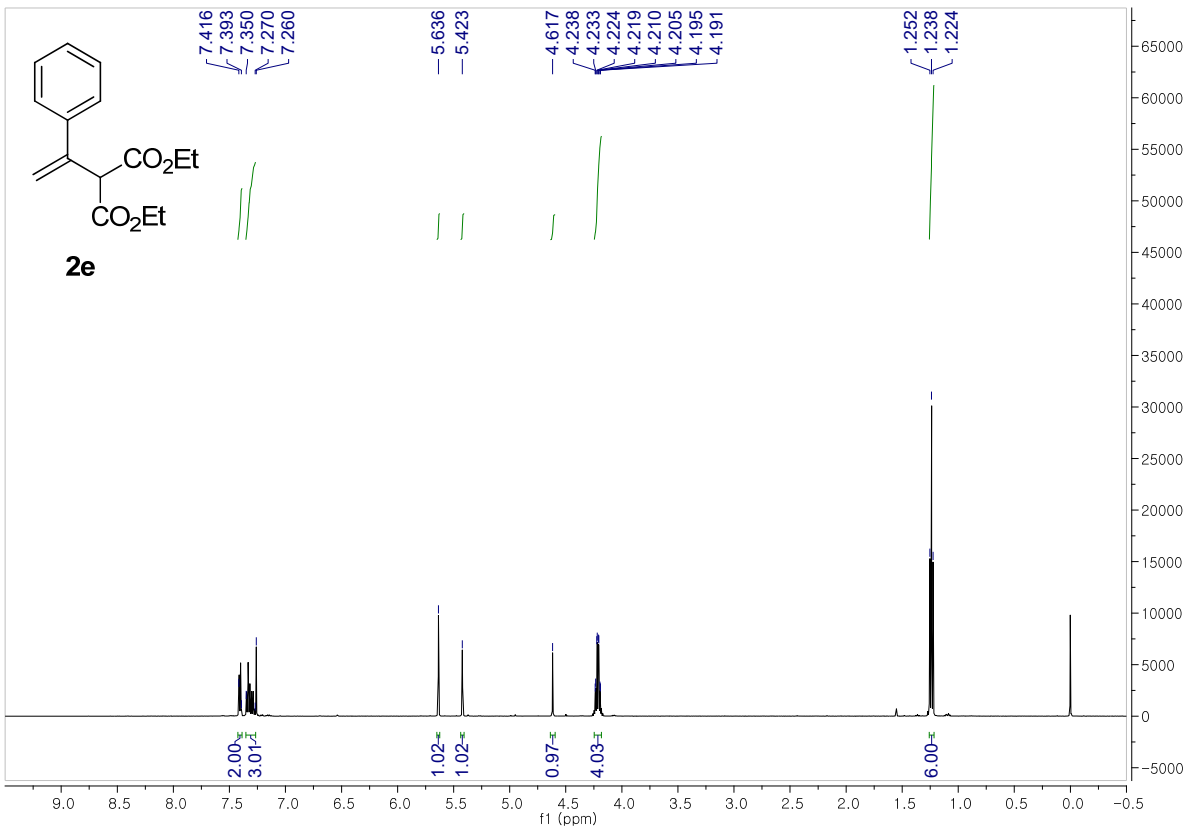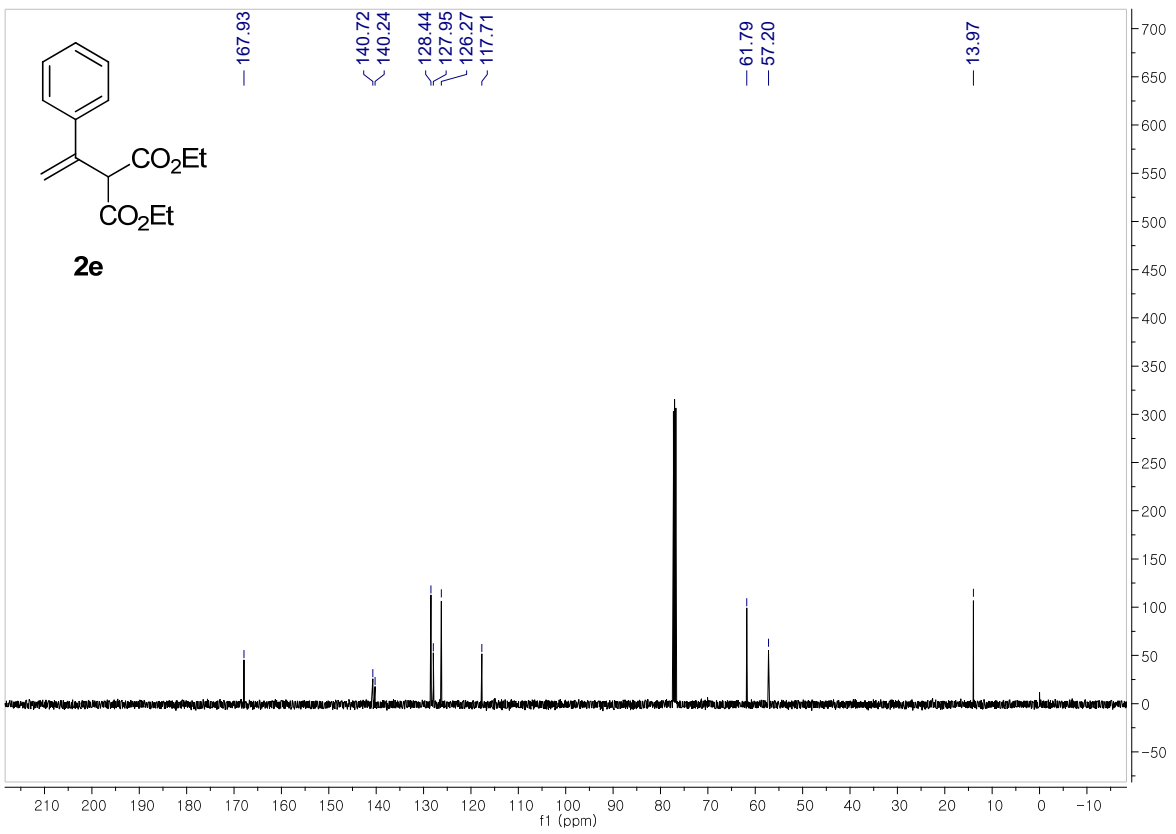

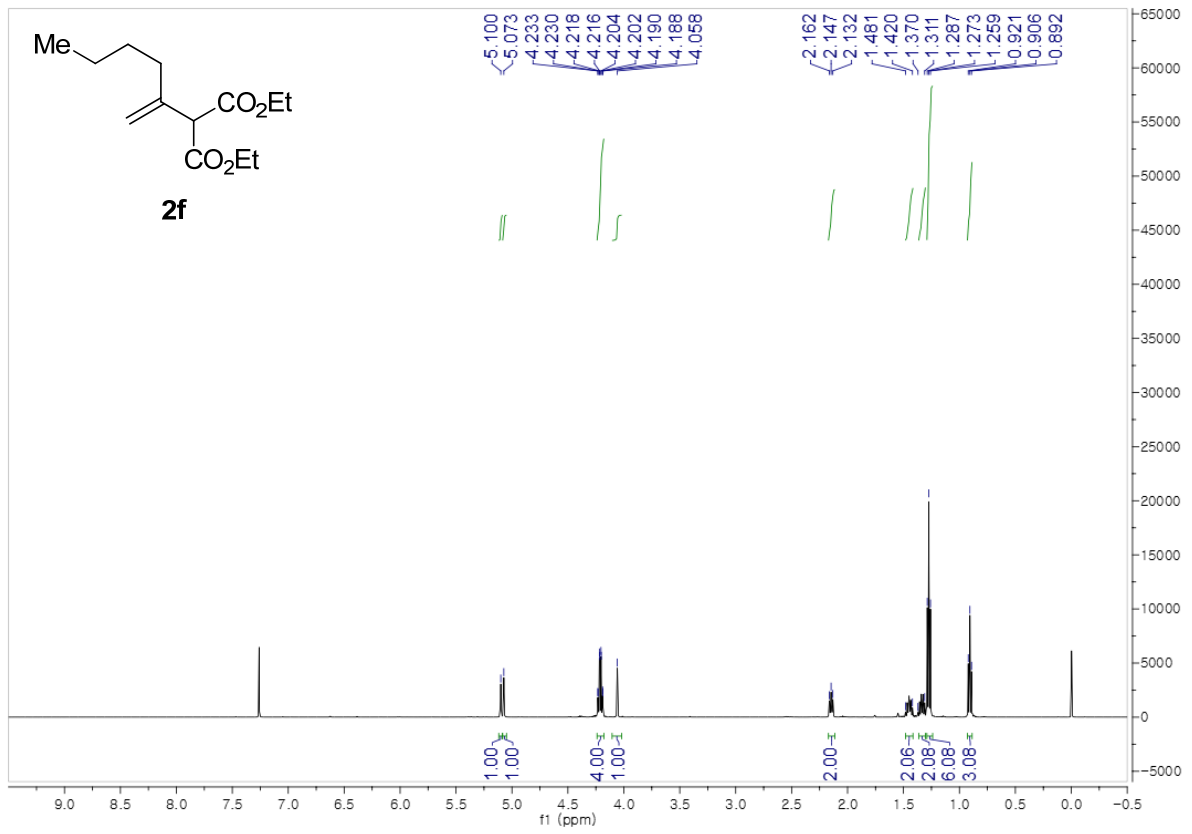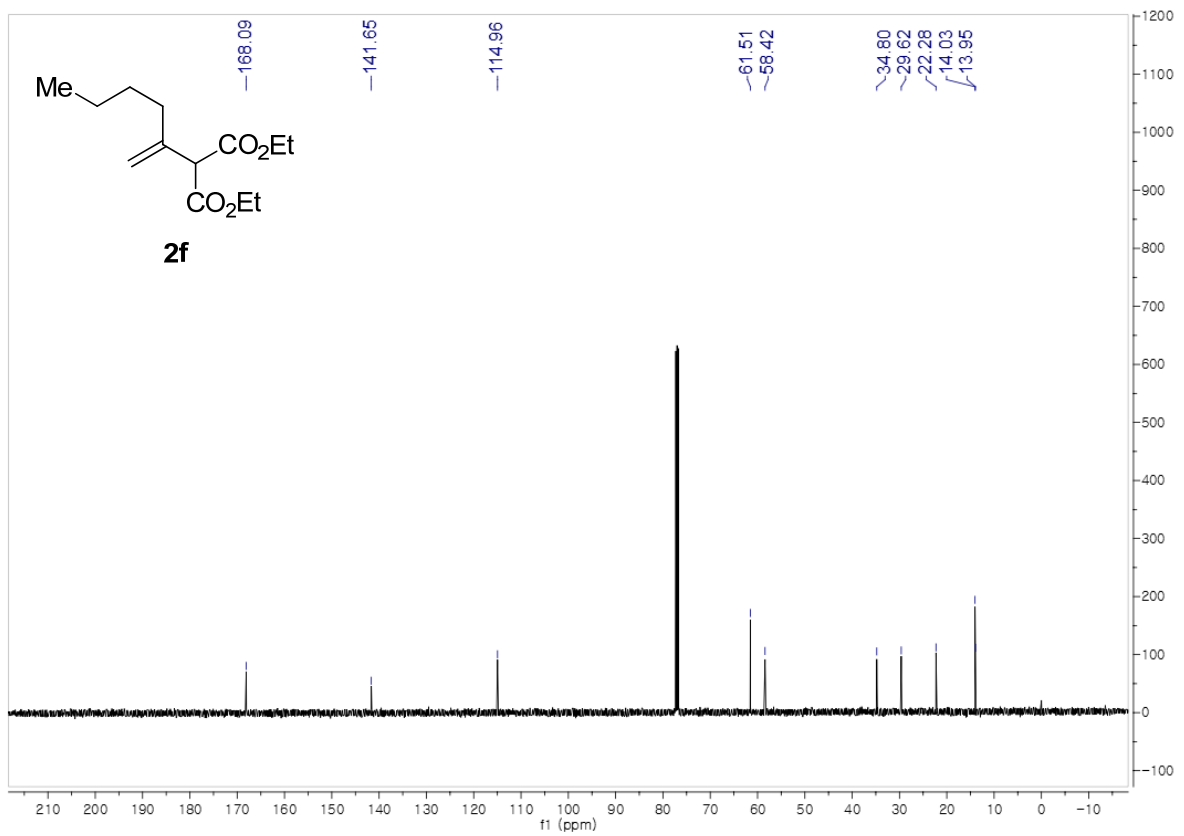

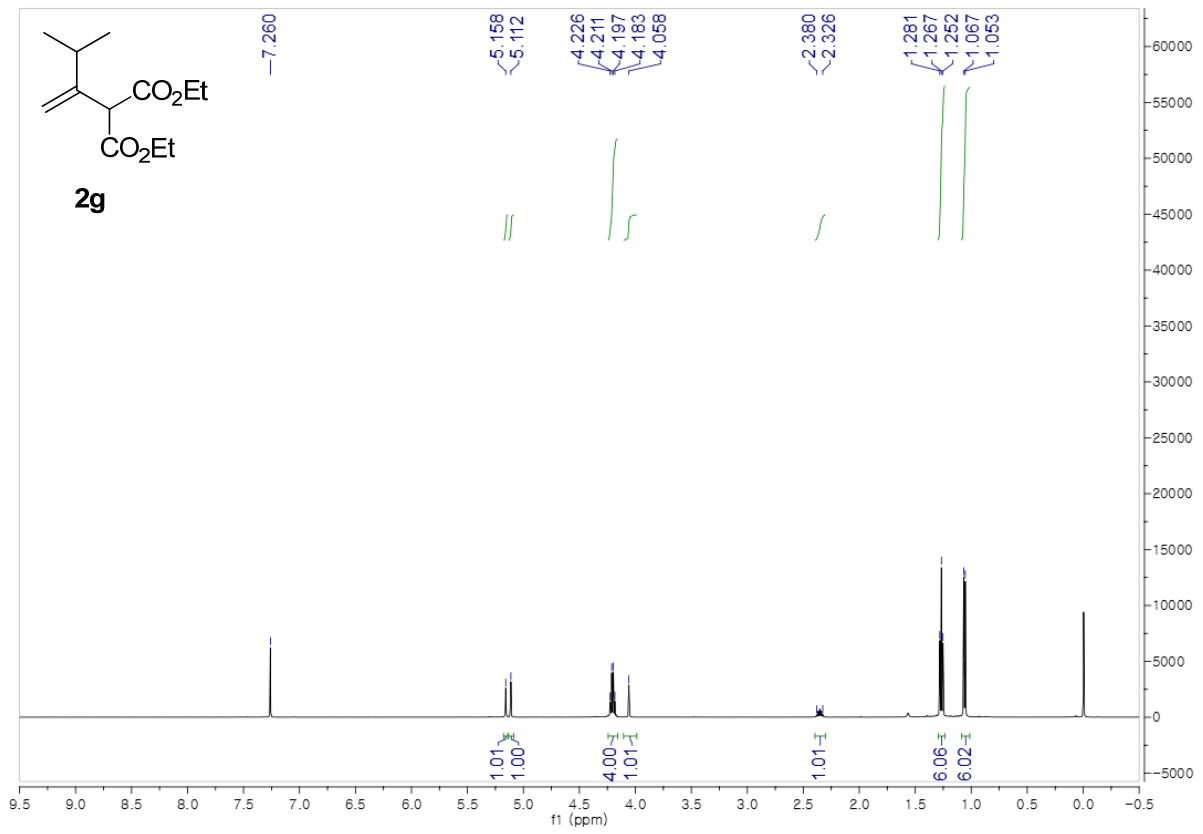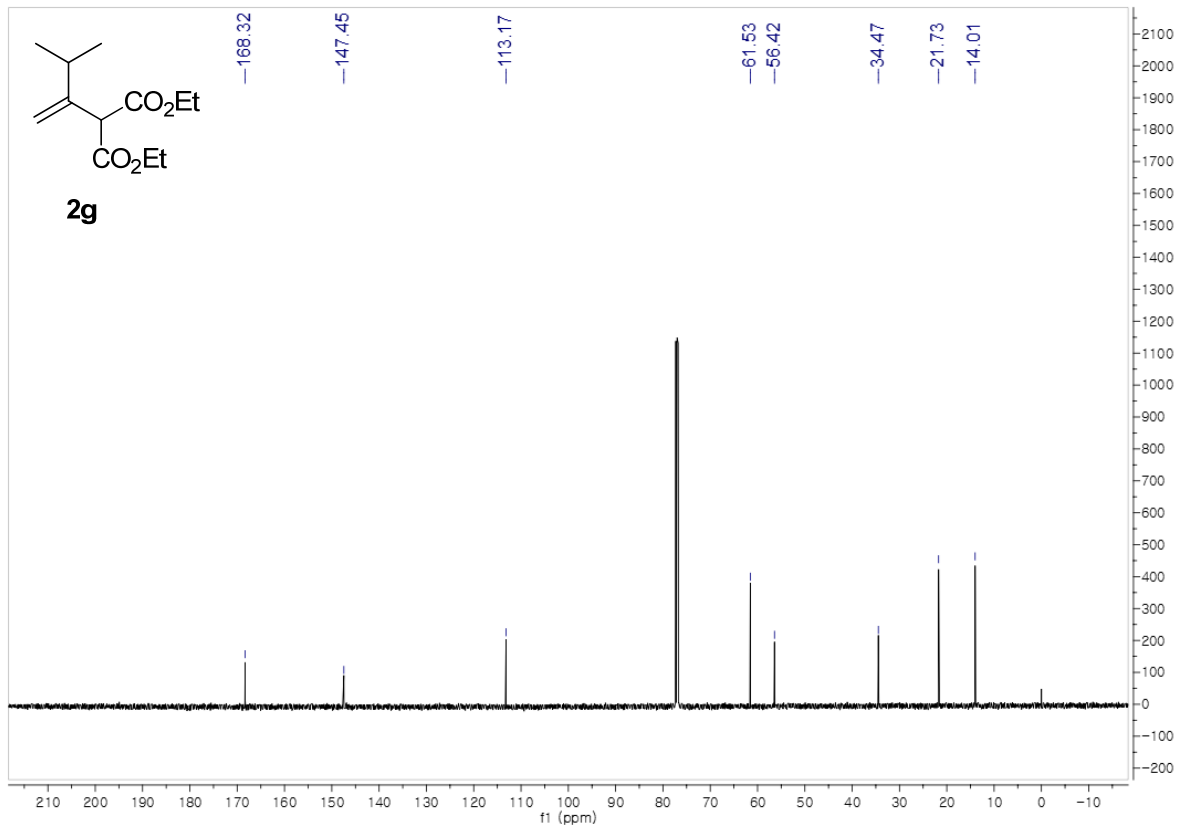

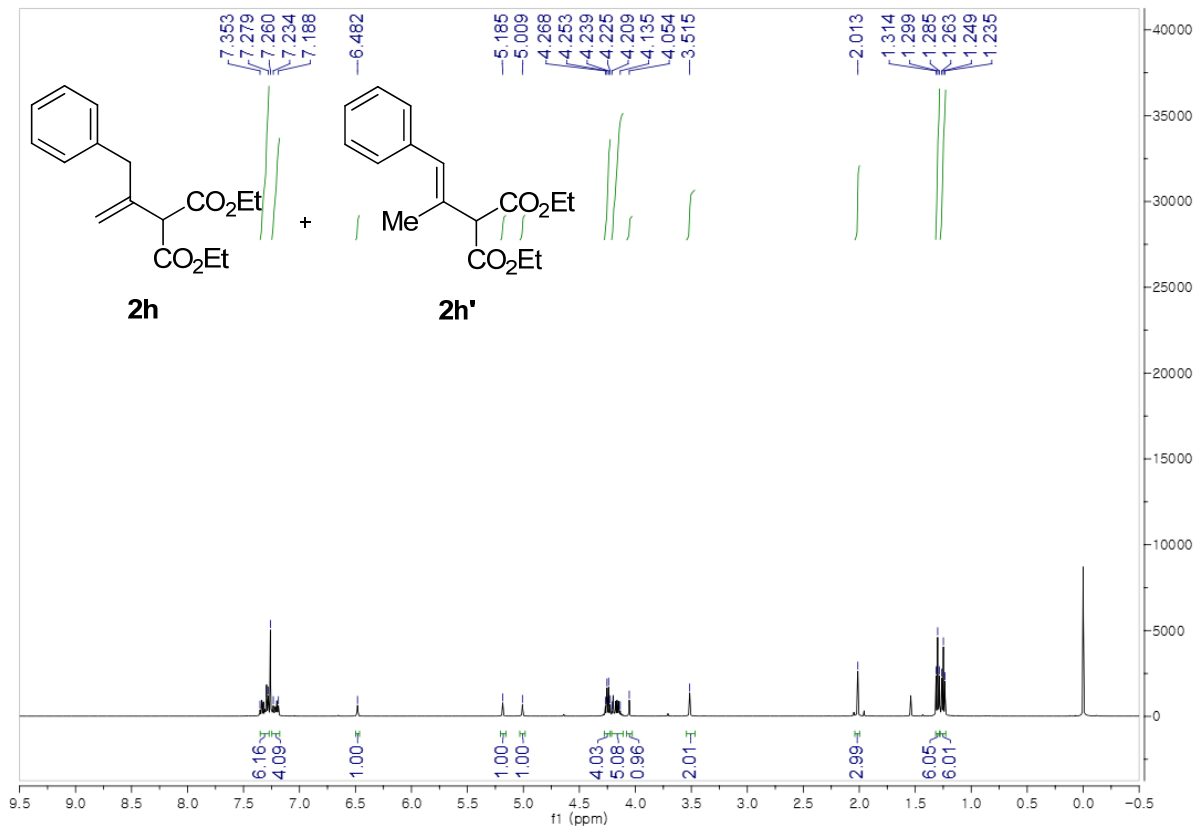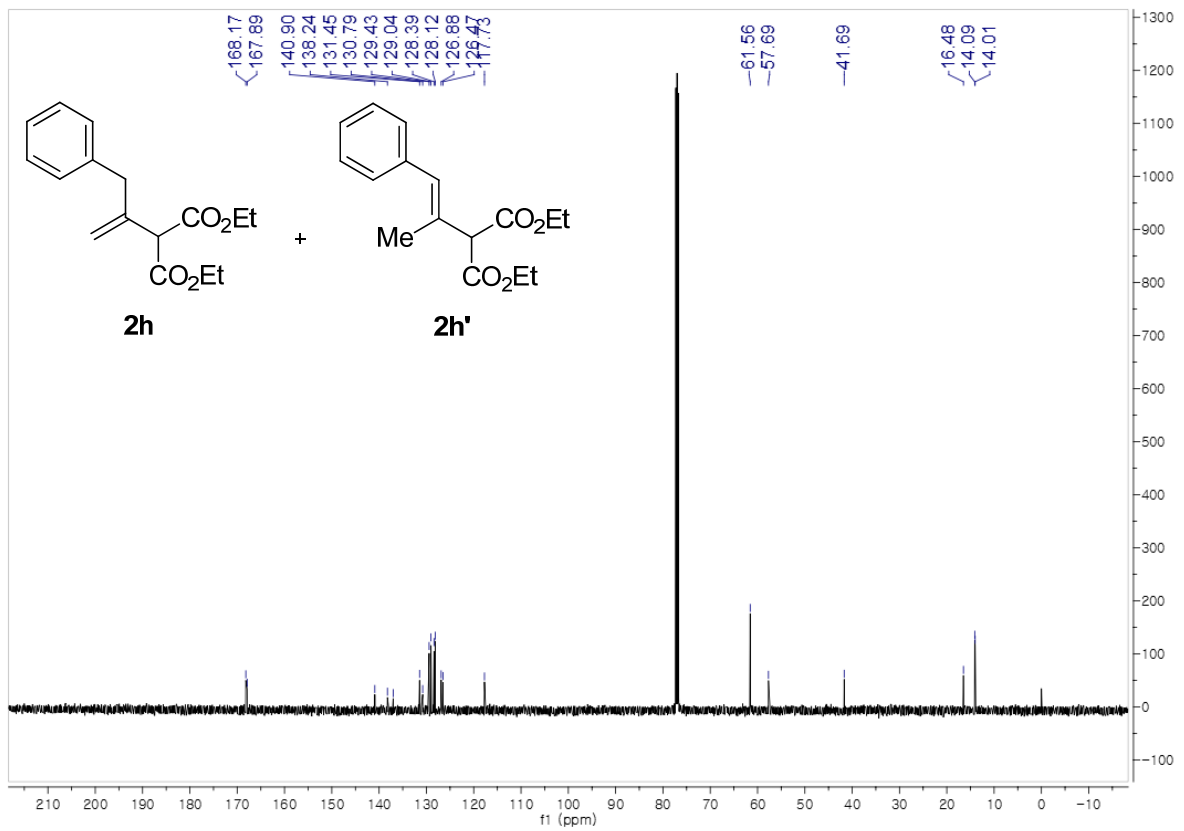

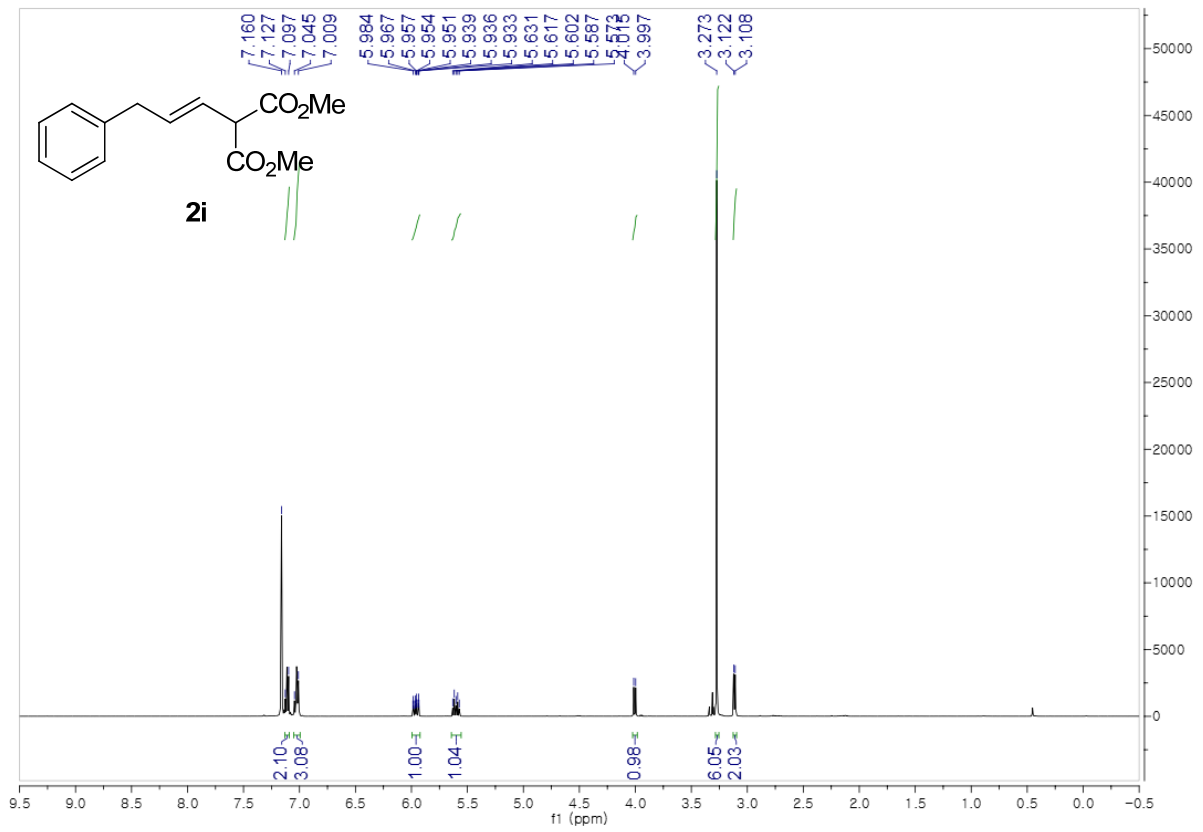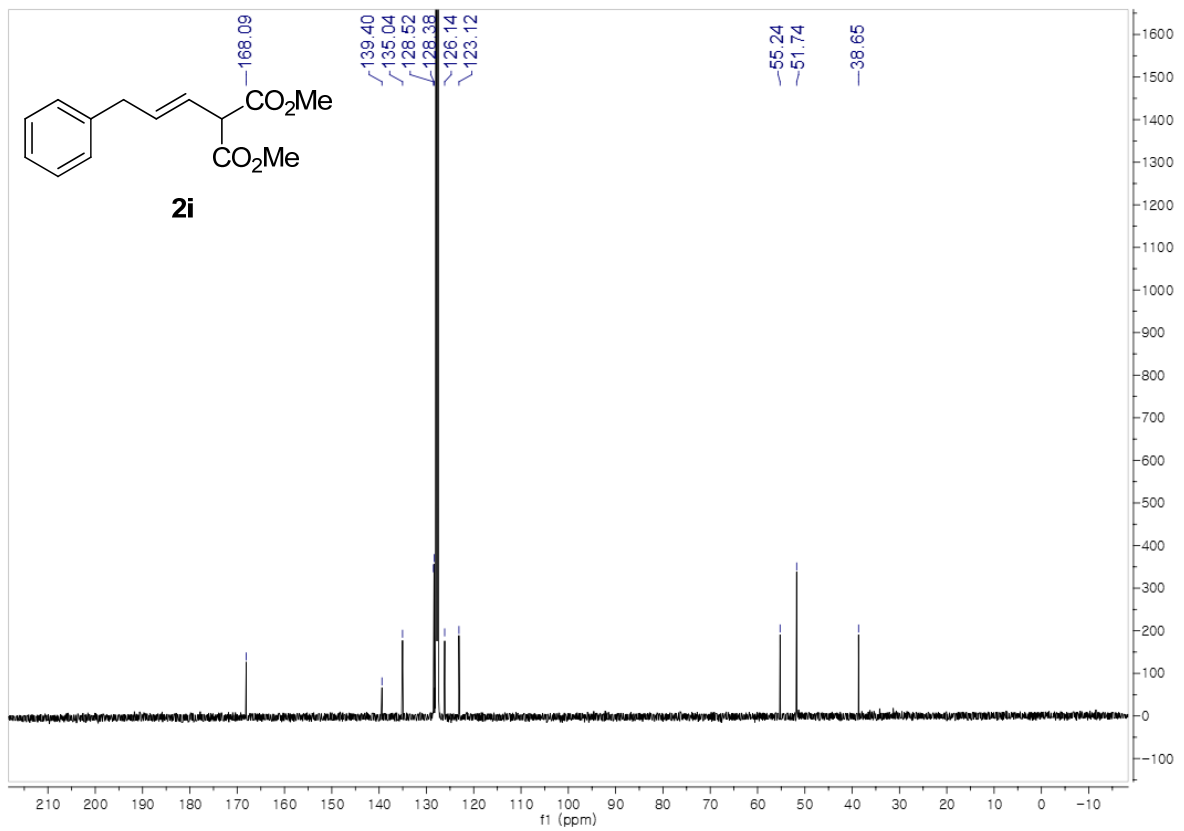

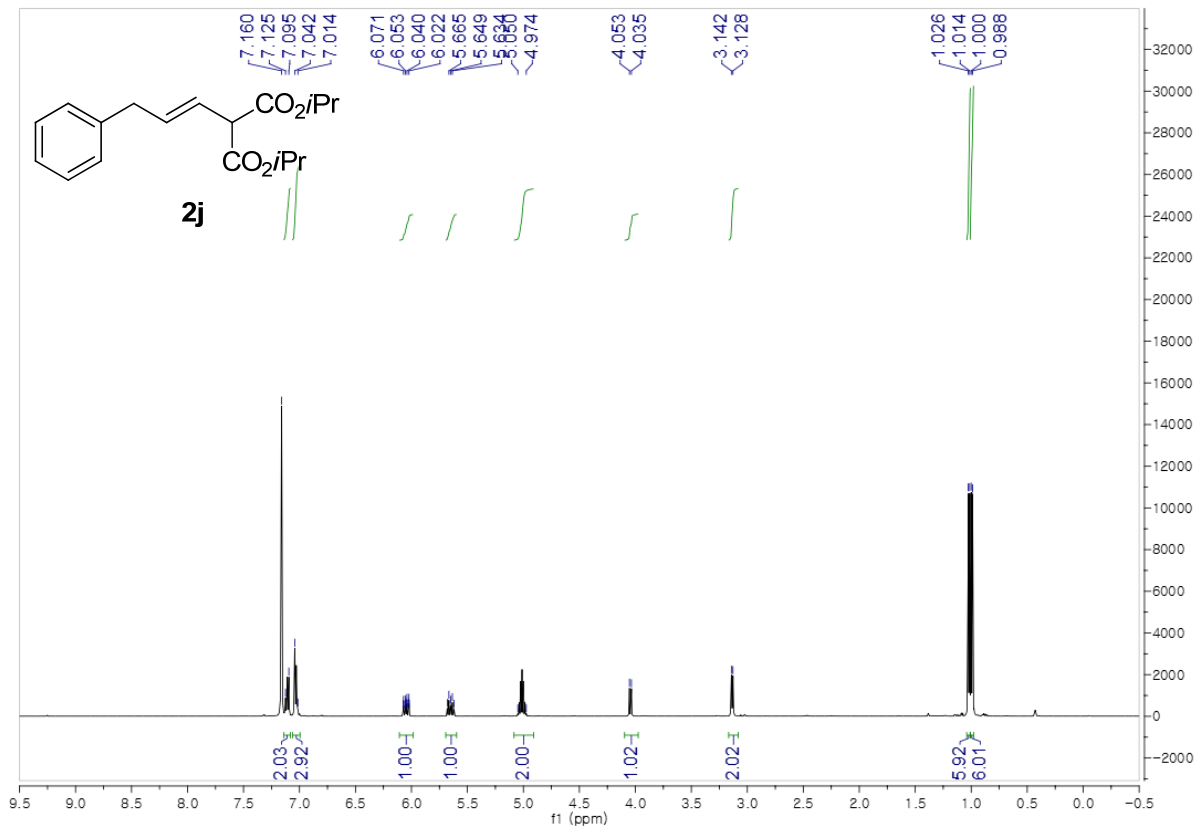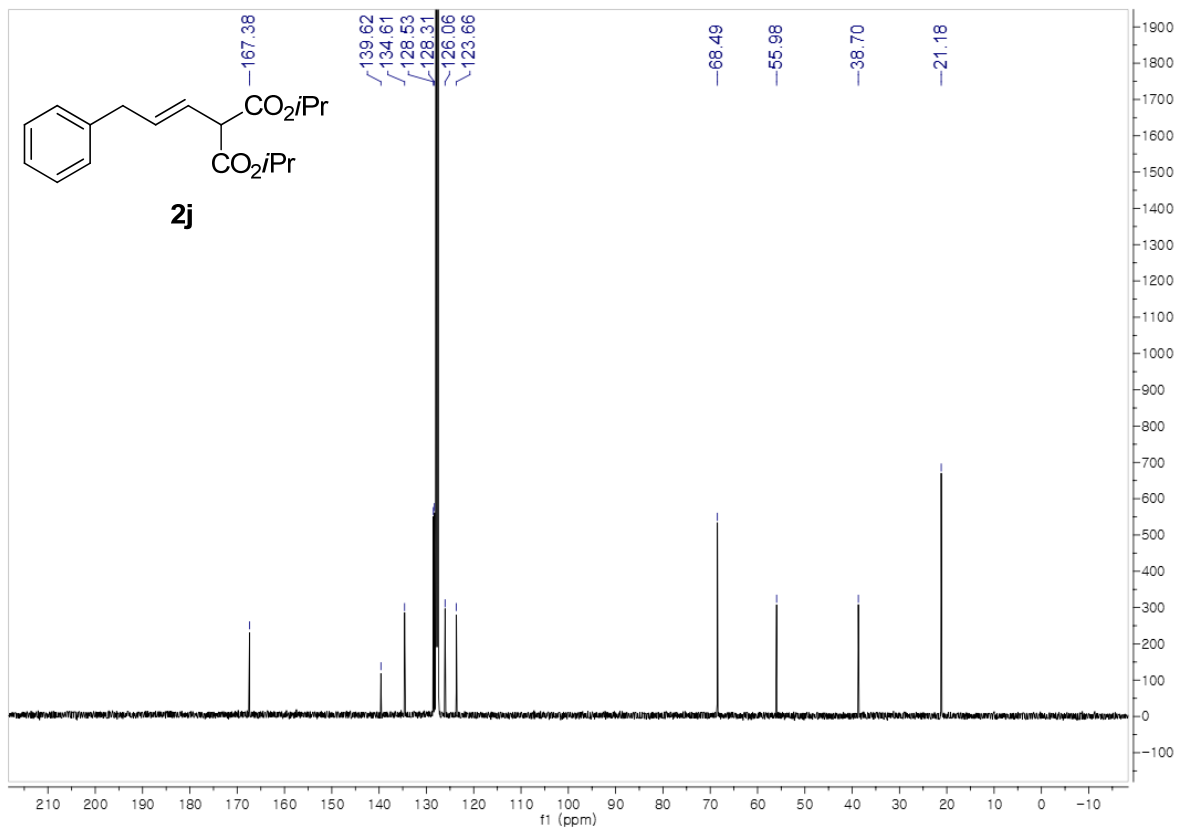

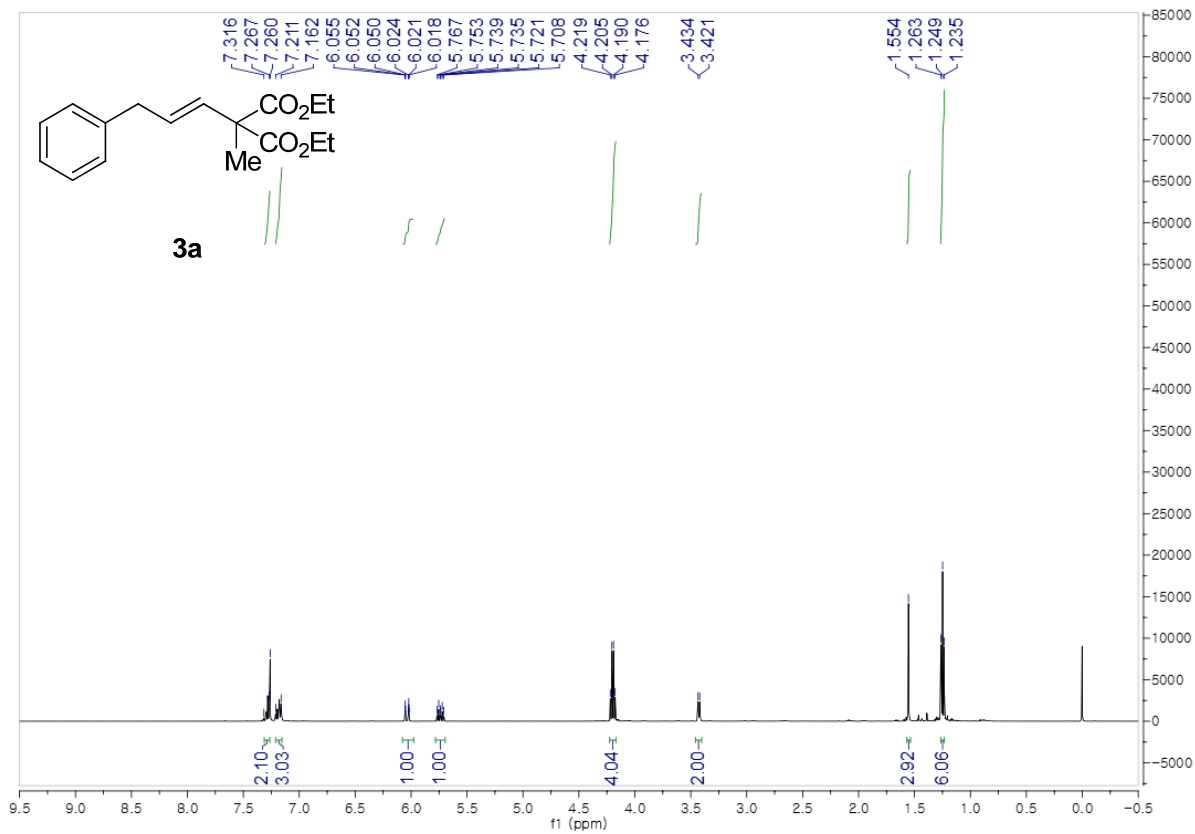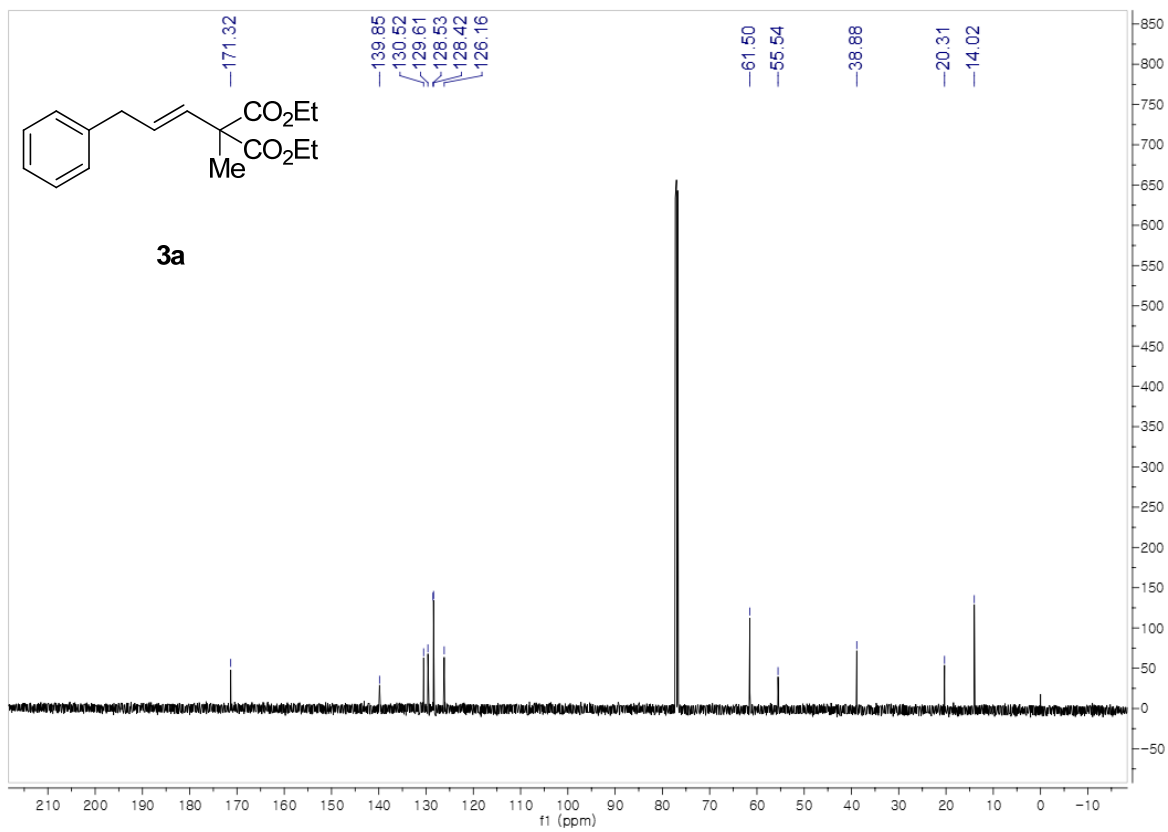

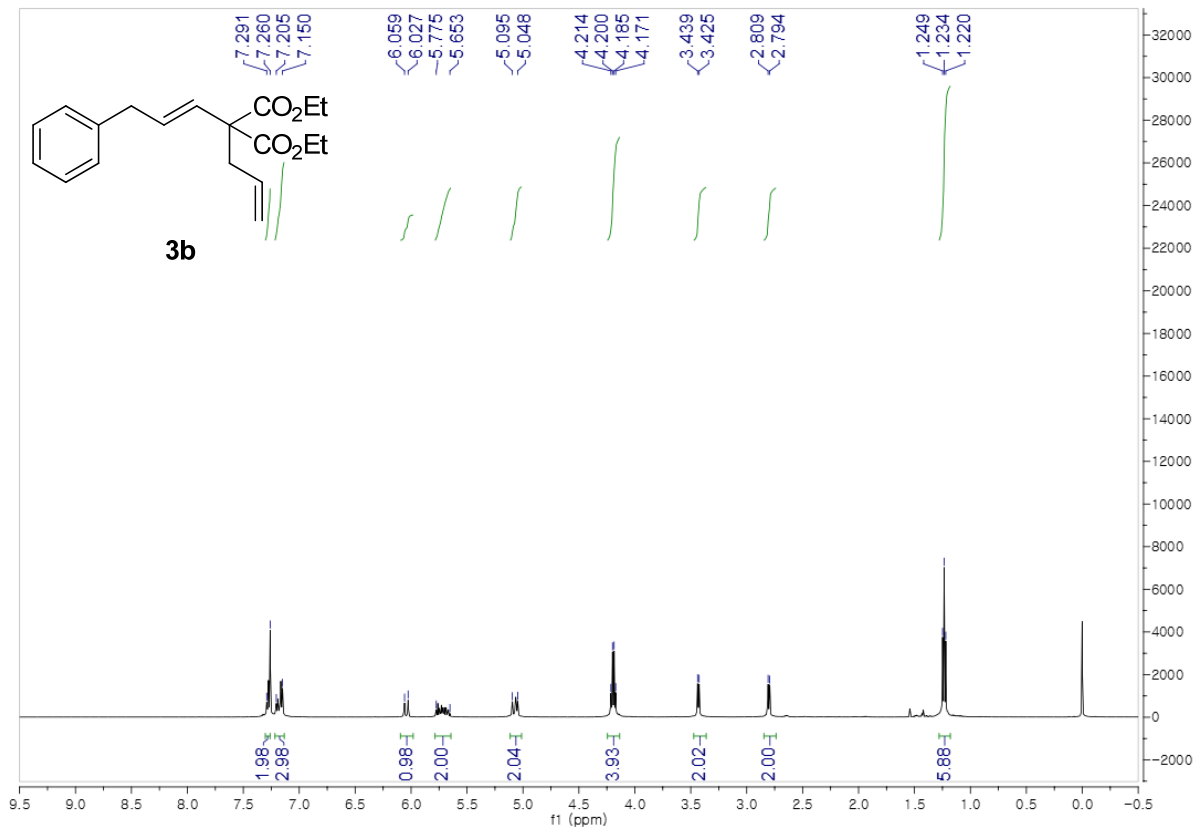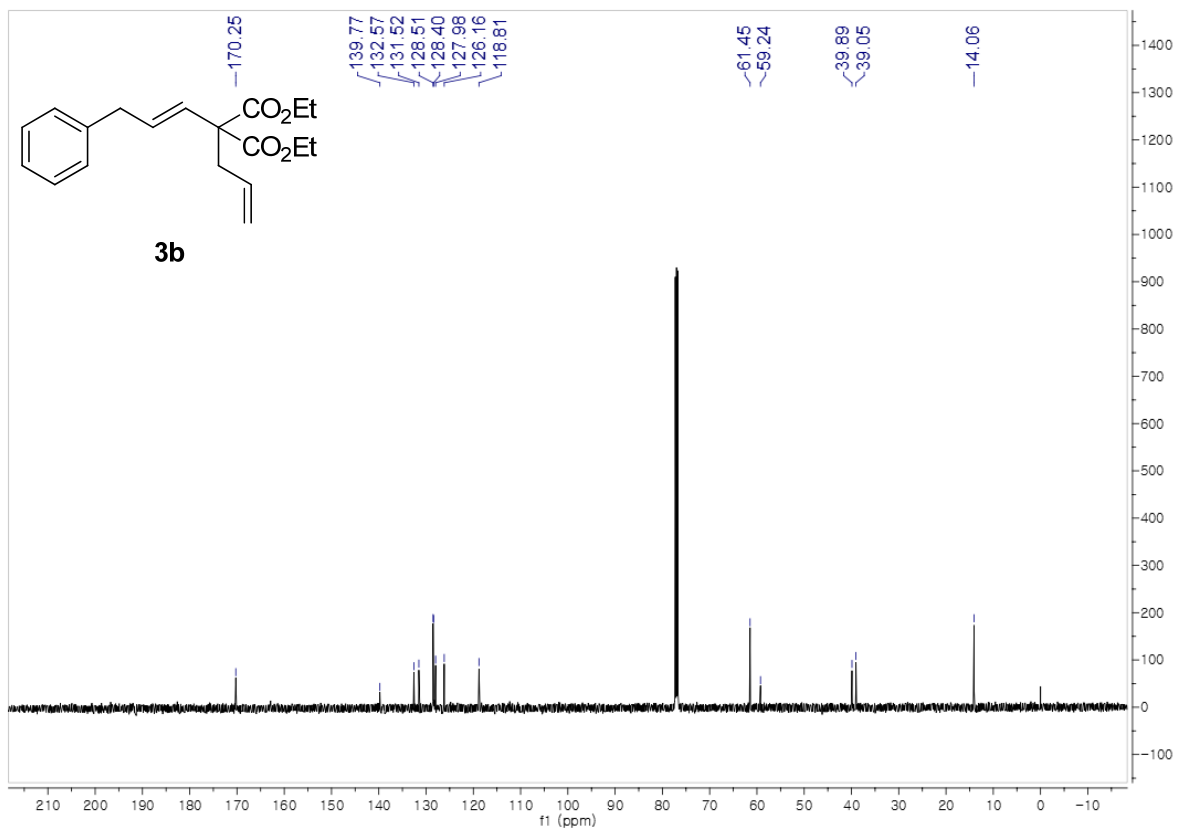



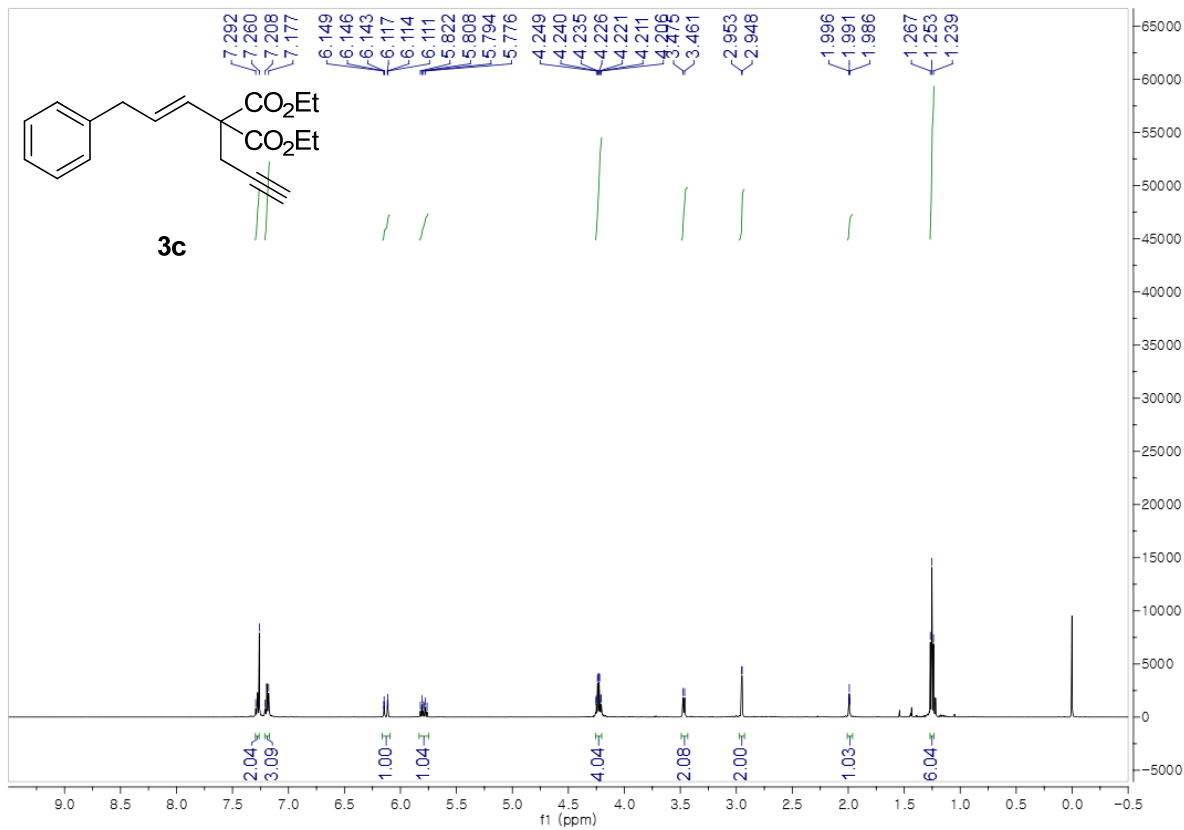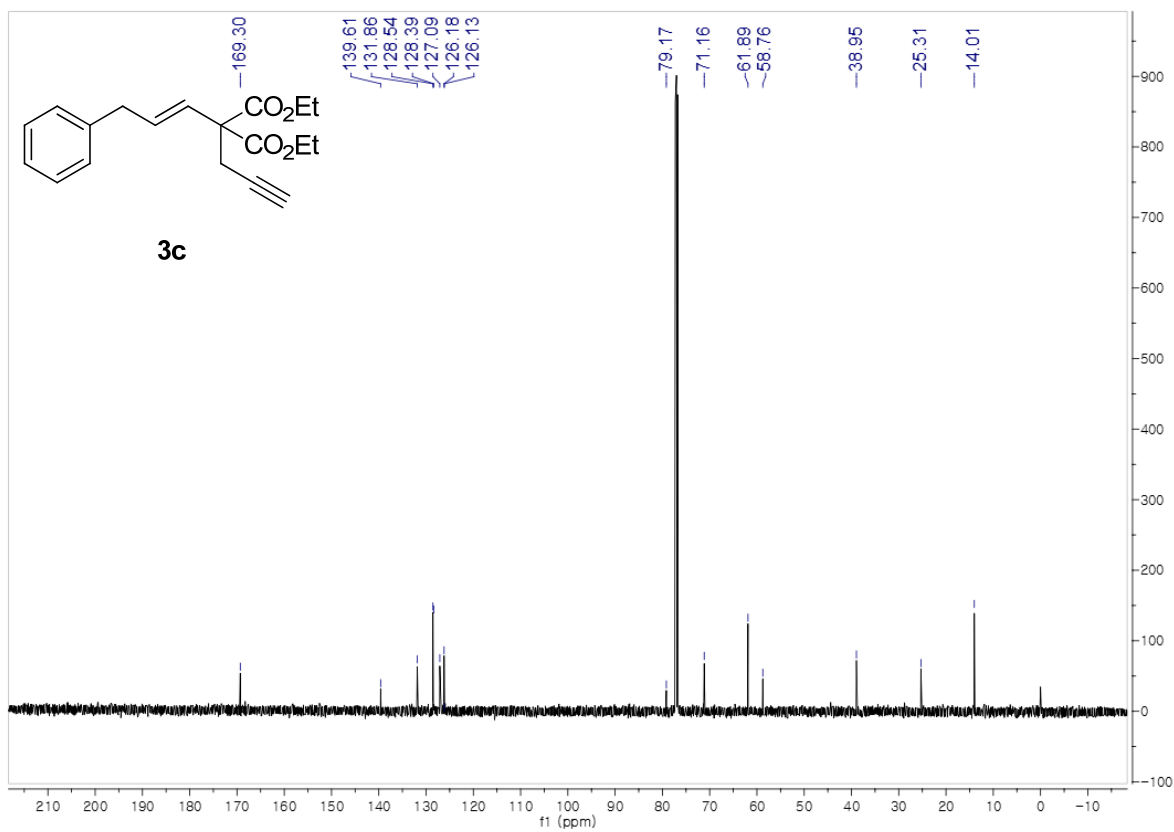

Supplement: d0qo01091j1.pdf [file d0qo01091j1.pdf]
